# Supplementary material for: LTD at amygdalocortical synapses as a novel mechanism for hedonic learning
Source: eLife. 2020 Nov 10;9:e55175. doi: 10.7554/eLife.55175 (PMC7655100; doi:10.7554/eLife.55175)
Supplement: Figure 1—source data 1. — Excel worksheet tabs are labeled to indicate the specific figure. Each data table is labeled to indicate the specific figure panel. The statistics worksheet indicates specific tests and values applied to each data set in the figure and supplements. [file elife-55175-fig1-data1.xlsx]

## Sheet: Fig.1 Values
	1B - Control										1B - CTA										1D			1F			1F
	CONSUMPTION (ml)										CONSUMPTION (ml)										AVERSION INDEX			cFos+ cells/0.1 sq mm			EGR1+ cells/0.1 sq mm
	HABITUATION - H2O				CONDITIONING			TEST DAY			HABITUATION - H2O				CONDITIONING			TEST DAY			(H2O - sucrose)/(H2O + sucrose)
	DAY 1	DAY 2	DAY3	DAY 4	SUCROSE #1	DAY 6 - H2O	SUCROSE #2	SUCROSE	H2O		DAY 1	DAY 2	DAY3	DAY 4	SUCROSE #1	DAY 6 - H2O	SUCROSE #2	SUCROSE	H2O		Control	CTA		Control	CTA		Control	CTA
	4.44	4.3	5.66	4.35	6.58	6.3	6.84	5.25	2.48		2.97	3.05	3.31	3.89	7.74	3.57	4.09	0.55	4.16		-0.358344	0.766454		91.0452	69.205		121.059	147.179
	3.36	5.75	4.24	4.02	7.28	5.73	6.43	5.65	1.35		4.27	3.81	4.79	4.14	7.22	5.2	6.9	2.61	3.42		-0.614286	0.134328		119.923	29.4989		153.147	94.3187
	2.91	4.11	4.7	4.21	8.55	5.93	7.85	10.87	0.72		3.71	3.92	4.29	5.39	6.99	4.19	4.24	0.16	5.11		-0.875755	0.939279		133.771	95.357		161.011	166.014
	3.94	5.22	6.24	6.96	7.83	6.06	6.06	7.92	1.38		3.73	3.69	4.29	5.72	8.32	6.15	6.56	2.03	4.6		-0.703226	0.387632		121.978	99.0486		228.869	117.343
	5.66	5.78	7.41	6.02	7.2	8.76	11.06	7.28	2.34		4.44	4.09	4.41	4.91	6.96	4.78	5.12	0.3	4.66		-0.513514	0.879032		158.798	93.6088		198.326	137.82
	3.18	2.85	0.73	4.77	4.46	4.6	5.43	6.77	1.47		3.13	4.35	3.36	3.42	6.53	5.06	6.64	0.71	5.44		-0.643204	0.769106		143.292	106.517		192.982	135.523
	3.78	4.51	4.56	6.01	7.8	5.15	6.05	8.79	6.05		3.66	4	3.44	4.94	5.49	5.23	4.36	0.54	4.78		-0.184636	0.796992
	4.23	4.37	4.89	3.88	5.37	5.87	8.22	8.38	0.83		4	4.84	5.16	4.84	8.57	4.4	6.43	0.21	4.62		-0.819761	0.913043
	3.33	3.62	4.01	3.71	1.8	4.92	1.41	5.05	2.27		2.41	3.68	3.73	4.64	6.23	4.02	7.14	0.21	4.62		-0.379781	0.913043
	4.57	5.14	4.44	5.26	6.76	7.7	9.4	8.08	2.66		4.22	4.09	3.95	4.47	7.39	4.46	4.12	0.4	6.46		-0.504655	0.883382
	3.73	2.71	3.16	3.72	7.02	3.89	9.27	9.57	0.83		3.54	5.39	4.03	6.06	5.18	4.2	2.75	0.21	4.93		-0.840385	0.918288
	4.11	4.95	5.62	6.41	7.58	7.13	8.57	10.17	0.33		3.82	5.04	6.28	6.34	11.02	6.02	6.28	0.25	4.74		-0.937143	0.8998
	4.73	5.36	6.84	6.17	9.78	1.12	10.15	8.87	2.86		7.47	4.09	4.41	5.39	6.2	5.77	3.22	0.45	2.95		-0.512361	0.735294
	4.1	5.17	5.31	5.39	7.32	5.77	6.76	7.6	0.88		7.81	4.57	4.29	6.1	6.34	5.19	5.78	0.92	6.92		-0.792453	0.765306
	3.43	3.74	3.52	3.7	5.57	5.77	7.47	7	0.47		3.19	4.67	4.3	4.82	5.87	4.87	3.95	1.36	3.65		-0.874163	0.457086
	4.17	3.53	4.74	4.66	6.73	6.39	7.71	9.14	1.59		4.57	4.25	4.11	5.23	7.83	5.59	6.59	0.32	4.85		-0.703635	0.876209
	3.41	7.27	5.58	6.05	7.82	4.72	7.98	10.14	0.48		3.37	3.34	2.73	4.25	3.14	2.94	4.66	0.5	3.36		-0.909605	0.740933
	4.91	4.5	7.8	5.73	5.62	4.04	7.94	4.55	3.72		2.53	3.8	3.92	4.29	4.62	2.58	3.98	0.24	4.14		-0.100363	0.890411
	4.72	4.14	3.63	3.23	6.65	3.98	8.59	7.18	2.35		3.53	4.39	4.3	4.46	6.38	3.27	4.74	0.46	4.88		-0.506821	0.827715
	3.42	4.81	4.05	3.48	5.87	4.45	6.3	7.15	1.35		3.14	4.39	2.5	5.38	7.44	4.01	2.71	0.29	6.03		-0.682353	0.908228
	2.56	3.33	3.76	4.91	5.31	4.74	5.28	4.52	0.41		0.23	3.57	4.24	0.04	6.03	0	3.19	0.97	4.65		-0.833671	0.654804
	5.05	5.54	5.2	6.83	11.8	6.98	11.87	11.04	0.44		0.45	3.67	3.79	4.17	4.48	4.78	3.21	0.35	4.8		-0.923345	0.864078
	3.02	3.59	3.67	4.72	5.73	4.53	6.72	8.26	0.44		3.63	4.98	4.85	5.36	7.51	3.75	6.05	0.65	7.06		-0.898851	0.831388
	3.75	3.62	4.29	5.17	6.61	6.63	9.19	7.65	1.35		4.35	4.59	5.09	5.66	9.07	6.24	5.87	0.43	5.87		-0.7	0.863492
	0	3.48	4.44	3.43	5.35	3.92	7.01	6.35	1.54		3.89	3.78	3.77	5.62	9.56	4.79	4.98	1.14	4.98		-0.609632	0.627451
	3.5	3.83	5.12	6.32	6.18	7.16	8.36	7.26	1.53		4.46	3.57	3.71	4.52	7.8	5.16	7.2	0.32	5.24		-0.651877	0.884892
	4	4.81	5.05	5.31	6.85	6.15	8.99	5.92	2.61		3.79	5	5.94	5.66	5.84	4.34	4.37	0.26	3.37		-0.388042	0.856749
	2.6	3.47	3.83	3.49	4.25	5.92	9	7.22	0.31		4.83	4.62	4.46	5.63	8.16	4.37	6.67	1.51	3.77		-0.917663	0.42803
	3.68	3.9	4.59	5.05	6.94	5.48	7.83	10.07	0.36												-0.930968
	3.72	3.26	4.68	3.54	7.24	7.15	8.88	7.88	0.05												-0.98739

## Sheet: FIg.1 Supplemental 1 Values
	1.1A,B
	Control			CTA
	AVERAGE H2O	SUCROSE #1		AVERAGE H2O	SUCROSE #1
	4.6875	6.58		3.305	7.74
	4.3425	7.28		4.2525	7.22
	3.9825	8.55		4.3275	6.99
	5.59	7.83		4.3575	8.32
	6.2175	7.2		4.4625	6.96
	2.8825	4.46		3.565	6.53
	4.715	7.8		4.01	5.49
	4.3425	5.37		4.71	8.57
	3.6675	1.8		3.615	6.23
	4.8525	6.76		4.1825	7.39
	3.33	7.02		4.755	5.18
	5.2725	7.58		5.37	11.02
	5.775	9.78		5.34	6.2
	4.9925	7.32		5.6925	6.34
	3.5975	5.57		4.245	5.87
	4.275	6.73		4.54	7.83
	5.5775	7.82		3.4225	3.14
	5.735	5.62		3.635	4.62
	3.93	6.65		4.17	6.38
	3.94	5.87		3.8525	7.44
	3.64	5.31		2.02	6.03
	5.655	11.8		3.02	4.48
	3.75	5.73		4.705	7.51
	4.2075	6.61		4.9225	9.07
	2.8375	5.35		4.265	9.56
	4.6925	6.18		4.065	7.8
	4.7925	6.85		5.0975	5.84
	3.3475	4.25		4.885	8.16
	4.305	6.94
	3.8	7.24

## Sheet: Fig.1 Supplemental 2 Values
	1.1B								1.1C					1.1D
	CONSUMPTION (ml)								CONSUMPTION (ml)					AVERSION INDEX
	HABITUATION - H2O				CONDITIONING				TEST DAY #1		TEST DAY #2			(H2O - sucrose)/(H2O + sucrose)
	DAY 1	DAY 2	DAY3	DAY 4	SUCROSE #1	DAY 6 - H2O	SUCROSE #2		SUCROSE	H2O	SUCROSE	H2O		TEST DAY #1	TEST DAY #2
	4.16	3.88	3.74	4.36	5.84	4.86	2.91		0.33	4.19	0.29	0.74		0.853982	0.436893
	4.81	4.18	5.01	4.93	7.63	6.1	3.66		0.35	4.83	0.22	1.18		0.864865	0.685714
	1.39	4.33	5.5	4.97	7.59	6.49	4.1		0.43	0.81	1.39	2.9		0.306452	0.351981
	0.33	5.96	4.75	4.63	5.77	2.95	5.26		0.1	5.88	0.31	7.07		0.966555	0.915989
	8.9	6.37	4.93	8.09	9.75	4.95	5.63		0.81	9.72	0.29	6.89		0.846154	0.91922
	4.23	5.23	5.65	7.03	9.32	5.87	9.23		1.39	6.54	0.32	8.24		0.649433	0.925234
	3.52	4.29	4.3	4.94	7.57	2.31	3.46		0.72	4.71	0.47	5.7		0.734807	0.84765
	3.71	3.76	4.72	5.97	8.09	2.98	4.43		0.16	6.57	0.48	6.5		0.952452	0.862464

## Sheet: Fig1 Statistics
	PANEL	SAMPLE SIZE	STATISTICAL TEST	D Mean [CI, lower limit, upper limit]	p-VALUE
	1B, Control, Conditioning: C1 vs. C2	N = 30 rats	Paired permutation t-test	1.09ml [95%, 0.58, 1.65]	0.0018
	1B, CTA, Conditioning: C1 vs. C2	N = 28 rats	Paired permutation t-test	-1.8 6ml [95%, -2.44, -1.33]	0
	1C, Control, Test day: H2O vs. sucrose	N = 30 rats	Paired permutation t-test	-6.20ml [95%, -7.03, -5.34]	0
	1C, CTA, Test day: H2O vs. sucrose	N = 28 rats	Paired permutation t-test	4.13ml [95%, 3.61, 4.56]	0
	1D, Aversion Indices: Control vs. CTA	control, N = 30 rats; CTA, N = 28 rats	Permutation t-test	1.44 [95%, 1.32, -1.54]	0
	1F, cFos: Control vs. CTA	control, N = 6 rats; CTA, N = 6 rats	Permutation t-test	-45.93 cells/area [95%, -78.12, -23.06]	0.0094
	1F. EGR1: Control vs. CTA	control, N = 6 rats; CTA, N = 6 rats	Permutation t-test	-42.87 cells/area [95%, -76.36, -9.87]	0.0478
	1.1A, Average H2O	control, N = 30 rats; CTA, N = 28 rats	Paired permutation t-test	-0.18ml [95%, -0.61, 0.24]	0.4264
	1.1B, Average H2O vs. C1 sucrose	control, N = 30 rats	Paired permutation t-test	2.24ml[95%, 1.72, 2.71]	0
	1.1B, Average H2O vs. C1 sucrose	CTA, N = 28 rats	Paired permutation t-test	2.68ml [95%, 2.13, 3.22]	0
	1.2B - Conditioning: C1 vs. C2	N = 8 rats	Paired permutation t-test	-2.86ml [95%, -3.73, -1.49]	0.0096
	1.2C, left - Test day A: H2O vs. sucrose	N = 8 rats	Paired permutation t-test	4.87ml [95%, 3.10, 6.40]	0
	1.2C, right - Test day B: H2O vs. sucrose	N = 8 rats	Paired permutation t-test	4.43ml [95%, 2.29, 6.17]	0
	1.2D - Aversion Indices: Test A vs. Test B	N = 8 rats	Paired permutation t-test	-0.03 [95%, -0.18, -0.09]	0.7388
