# Supplementary material for: LTD at amygdalocortical synapses as a novel mechanism for hedonic learning
Source: eLife. 2020 Nov 10;9:e55175. doi: 10.7554/eLife.55175 (PMC7655100; doi:10.7554/eLife.55175)
Supplement: Figure 2—source data 1. — Excel worksheet tabs are labeled to indicate the specific figure. Each data table is labeled to indicate the specific figure panel. The statistics worksheet indicates specific tests and values applied to each data set in the figure and supplements. [file elife-55175-fig2-data1.xlsx]

## Sheet: Fig.2 Values
	2C											2C			2D				2E																										2E
	CONTROL GROUP, N = 15 animals											CONTROL GROUP N = 15 animals			CONTROL GROUP, N = 8 animals				CONTROL GROUP, n = 24 cells																										CONTROL GROUP, n = 24 cells
															TOTAL CHARGE (pC)	MEAN sEPSC AMPLITUDE (pA)	MEAN sEPSC FREQUENCY (Hz)		sEPSC AMPLITUDE (pA, 100 events per cell)																										sEPSC INSTANTANEOUS FREQUENCY (Hz, 100 events per cell)
	FIRING FREQUENCY (Hz)											FI SLOPE	INPUT R (MW)		16.2723	13.134	10.3002		Cell 1	Cell 2	Cell 3	Cell 4	Cell 5	Cell 6	Cell 7	Cell 8	Cell 9	Cell 10	Cell 11	Cell 12	Cell 13	Cell 14	Cell 15	Cell 16	Cell 17	Cell 18	Cell 19	Cell 20	Cell 21	Cell 22	Cell 23	Cell 24			Cell 1	Cell 2	Cell 3	Cell 4	Cell 5
	0pA	50pA	100pA	150pA	200pA	250pA	300pA	350pA	400pA						17.5181	20.3739	25.9104		11.7215	37.8651	18.2489	24.8438	21.2516	18.4334	14.5845	23.1675	10.8326	21.1414	25.4725	22.1181	10.9066	11.1445	8.18537	14.1606	19.889	18.7659	19.5937	20.1357	15.2988	18.3469	17.5574	17.1216			0.556545	2.32126	1.71086	3.45782	0.185639
	0	0	0	5.71429	11.4286	15.7143	20	21.4286	24.2857			0.0604329	174.004		14.8854	16.2436	4.57333		20.528	22.2496	12.367	19.3327	48.2386	19.2433	17.0677	225.594	12.6951	20.0116	49.1161	24.8509	11.2503	15.9827	14.1162	37.6271	22.2649	18.037	45.4278	12.6562	18.0525	13.2013	33.7092	18.778			0.621504	1.66472	1.21168	1.10754	8.29876
	0	0	0	0	8.57143	14.2857	18.5714	21.4286	24.2857			0.0680952	128.157		16.5673	22.7599	5.79385		22.2024	30.2485	7.72172	17.4772	22.4152	17.2448	23.2375	116.011	12.9915	19.6438	24.9443	28.1151	20.1209	18.3043	14.0477	18.5396	19.3735	95.6879	17.9649	14.6681	36.6992	11.7221	11.3939	7.6772			0.375277	2.13858	0.725163	0.313824	1.93237
	0	0	8.09524	15.2381	19.0476	24.2857	15.2381	18.0952	17.619			0.125578	174.895		13.8307	17.8593	3.9702		16.1406	40.0776	7.78263	20.1734	31.0702	19.6738	13.5472	37.5553	13.3319	20.8356	16.1935	19.9261	16.9831	34.3851	33.7367	17.6719	59.0289	13.8821	31.3064	18.2481	9.72592	13.9942	8.13417	13.3028			8.59847	4.13565	10.0705	14.6843	0.091323
	0	0	0	2.85714	6.90477	10.9524	15	18.0952	20.7143			0.0597691	123.336		15.3644	22.5602	4.97645		42.7123	11.4201	7.28788	20.6424	21.4567	26.437	14.3282	32.0634	10.5124	21.9865	24.858	27.2062	18.3329	11.418	42.6954	54.7509	16.794	13.9644	22.0254	14.5575	9.39945	11.6997	10.7442	11.8884			1.04833	18.4843	0.993542	1.12158	0.181994
	0	0	6.19047	10.9524	17.6191	23.8095	29.5238	33.3333	37.619			0.101345	159.282		17.5354	27.8042	5.52992		17.1995	19.8681	25.5822	17.4673	22.5318	19.0994	14.4132	55.8374	14.7668	21.6161	17.0677	36.0125	19.8915	12.0088	7.4816	37.4628	26.2141	33.6228	18.4991	12.1311	12.2367	19.6268	23.4389	12.1766			3.71057	1.23487	2.18055	0.780336	1.46135
	0	0	0.857142	4.00001	8	13.4286	17.4286	21.4286	24.8571			0.0717596	128.366		16.7558	21.1026	4.04491		16.9628	13.4395	8.32925	21.1713	23.9959	36.2415	12.3526	50.8561	9.34645	32.1638	16.4128	16.8836	22.1588	17.3303	13.3499	50.2464	13.1914	13.9878	17.7854	18.2506	27.3955	30.4766	20.4584	17.9443			2.71961	5.07614	2.5278	1.23701	0.369549
	0	0	0	0	2	6.85714	11.1429	14.2857	16.5714			0.056935	91.9808						17.198	18.0521	11.4133	16.073	19.0609	17.2244	30.7695	17.7712	14.2063	18.0762	30.8968	22.0064	13.656	31.3826	21.3477	27.4938	16.8039	13.3152	23.3428	15.3118	10.5558	17.2246	34.9078	17.2287			3.64298	23.8664	0.767577	0.113061	2.39635
	0	0	0	1.90476	5.2381	10.4762	14.7619	18.5714	20.9524			0.0690332	119.147						15.8508	16.7102	10.5089	21.3797	18.7575	15.3416	12.785	20.571	11.9556	42.2001	82.2369	11.8007	15.1276	13.2108	15.3895	15.8178	26.8837	14.428	23.0132	14.6818	15.7912	14.7826	21.6164	13.4692			2.83688	1.19232	0.530814	0.217221	0.447888
	0	2.2449	8.36735	15.3061	21.2245	27.9592	32.6531	36.3265	36.9388			0.113736	177.92						17.3671	16.6123	9.63543	16.2665	16.7924	21.1633	21.1307	44.9926	11.3318	43.147	26.4182	31.8232	30.1895	18.7105	21.9769	62.6702	15.3485	28.3549	23.1289	13.4953	35.343	12.5456	12.5635	9.28476			9.93055	2.31911	1.44342	0.212517	2.88017
	0	0.357142	3.57143	5.71427	8.92857	11.4286	15.7143	17.8571	22.1428			0.0633392	109.857						17.9263	27.4674	20.9448	23.8196	32.2217	14.2568	21.3288	18.2099	14.2358	43.8052	23.1564	15.2099	12.536	10.9462	15.2354	19.6761	15.603	60.7531	15.0397	34.1414	14.7975	11.0589	11.7626	13.7889			4.79846	0.541682	0.360685	0.996214	0.682175
	0	0.238095	5.47618	9.04762	12.6191	17.1429	18.8095	13.0953	13.5714			0.0885755	152.676						17.1096	25.0097	7.59319	24.6362	21.4188	23.7872	13.0194	20.066	8.92354	26.4088	36.4941	21.5591	12.4854	17.3057	16.2326	21.1456	17.0837	26.1005	27.1312	12.5828	8.98295	11.167	8.7396	14.7293			4.82625	1.0917	0.270314	0.392003	0.617399
	0	0	0	4.28571	10	14.2857	15.7143	18.5714	20			0.0516017	140.62						14.5537	16.8028	10.8459	21.5716	26.4505	10.6507	19.7784	19.7919	9.53478	15.781	16.9506	35.4296	15.9066	14.7867	20.9202	17.2377	18.0474	20.5373	23.3202	12.8365	24.2962	13.7753	11.1624	16.6771			5.33903	1.22324	1.56986	2.50188	0.56123
	0	0	0	2.14285	3.57143	7.14287	10.7143	14.2857	17.1429			0.0550866	114.141						16.2236	51.0464	7.87448	19.7016	24.5812	15.0939	11.7679	46.5436	15.4261	27.9652	41.6915	22.8911	9.99577	20.3346	9.25719	15.2608	14.3218	13.4003	35.4595	14.2997	9.78559	15.1493	8.80684	13.1974			7.06216	2.7027	1.7507	0.686907	1.19761
	0	0	0	1.42857	5.2381	9.52381	14.2857	17.619	21.4286			0.0703607	107.032						13.7761	23.0709	14.4512	19.0571	22.6133	17.4967	13.8233	16.5913	14.7093	24.7607	14.98	72.0391	28.9008	19.3476	31.8824	20.5586	15.9089	20.8336	17.2412	32.8783	6.66364	16.8833	16.1547	20.7676			6.69789	12.547	0.727379	2.06186	15.3142
	0	0	0	3.57142	10	14.2857	17.8572	21.4286	24.2857			0.0671429	145.613						20.9449	23.6721	8.74392	22.3529	22.1328	15.6155	19.8719	34.4076	10.8297	30.4621	23.3523	101.022	17.8819	17.5205	13.2327	17.3376	14.2629	31.5712	17.0975	22.0243	7.90043	10.6749	34.0077	20.2338			17.8893	3.50877	3.09597	1.38045	1.11383
																			12.5259	15.8213	10.8442	24.5007	18.3636	30.5636	11.7845	27.241	11.4861	21.0422	26.7263	16.8522	19.5586	30.0684	15.7145	19.0974	16.1808	26.0108	40.2479	20.4787	22.2188	13.0872	21.286	29.4431			17.7303	3.93547	0.948227	0.459982	0.62547
																			16.9542	24.3867	10.6985	13.9363	20.3662	33.9591	14.6641	23.4879	12.6683	53.8614	29.0988	24.2336	10.5392	15.9338	16.6963	24.998	14.697	81.7508	18.668	19.595	8.32182	16.8209	10.808	21.5834			1.18231	1.28502	3.81679	15.244	0.296314
																			22.4548	36.0291	30.1649	19.2339	21.4175	16.5099	10.8014	25.4405	13.6635	23.8888	15.1512	31.8629	14.5269	23.696	11.6922	17.6226	23.466	50.8766	23.1263	17.134	9.59772	20.2413	9.79161	16.6194			2.14041	3.75375	2.20653	0.500876	0.054114
																			16.255	25.766	12.3459	17.2978	24.0433	39.4309	15.0335	33.6448	9.36239	25.4356	17.5102	14.4789	19.558	18.6055	11.5942	41.8896	12.9429	36.4593	27.3539	14.6266	9.44778	18.5144	19.6633	12.2668			3.42349	0.554262	0.550782	1.11396	8.64311
																			33.3222	18.1616	9.65012	18.6493	22.3287	53.0428	13.582	23.3745	10.6173	19.7468	37.6231	41.9801	19.9452	16.9044	8.78295	31.217	17.8832	16.6868	51.3437	17.7364	15.4185	12.5417	13.3478	12.2066			12.5627	0.718339	5.29382	0.644371	3.87597
																			17.4929	20.2009	11.4925	27.1754	19.6663	18.9144	18.1838	41.6201	14.1303	21.732	46.8753	23.921	55.559	19.5276	16.0337	48.8728	20.7478	27.5257	36.2679	14.9856	11.9532	12.5955	13.9364	10.2046			3.28084	6.854	0.469373	6.53595	1.31372
																			14.1057	22.7057	10.804	26.6603	21.6139	38.8217	9.99456	23.376	12.0296	20.5233	45.2117	13.0342	12.9094	37.1548	25.5037	43.859	15.1377	18.524	19.9028	33.1176	15.1159	13.0265	16.395	10.6649			1.43885	4.62321	0.631632	1.13097	0.299007
	2C											2C			2D				30.3584	23.9117	11.4668	27.6254	15.1462	26.5542	23.0955	25.159	10.7883	21.6891	36.0841	29.2614	22.203	19.1066	20.2308	14.1914	29.9691	32.7002	20.7671	19.0713	8.20894	14.8072	27.2803	14.49			4.37446	1.14064	1.10193	1.32961	0.509035
	CTA GROUP, N = 14 animals											CTA GROUP N = 14 animals			CTA GROUP, N = 7 animals				14.5313	18.4112	8.59154	22.5974	30.9334	20.7927	11.7471	46.5534	9.64865	15.4935	100.315	40.3025	17.2914	14.0171	14.0816	19.3305	15.8561	21.4487	19.8134	20.9262	11.5256	21.464	23.2693	12.3903			1.03146	3.30907	1.06101	0.502816	0.271157
															TOTAL	MEAN sEPSC	MEAN sEPSC		24.9609	17.6539	14.3238	15.6836	18.5766	14.2125	17.771	23.3706	12.427	21.4869	55.1471	16.0352	17.9691	12.1809	14.5859	20.0103	21.0415	23.9068	13.9822	19.2523	8.20272	23.2265	18.9755	8.27159			35.0874	14.1642	11.6822	0.379651	0.641766
	FIRING FREQUENCY (Hz)											FI SLOPE	INPUT R (MW)		CHARGE	AMPLITUDE	FREQUENCY		19.5102	18.0982	6.9007	24.2211	16.8292	14.2849	26.5781	62.826	12.8121	16.7783	36.9936	13.6791	17.9097	37.8096	16.1953	14.264	33.6834	31.4175	17.8258	14.3487	44.0622	11.7403	150.309	16.9866			5.10986	5.73724	0.75188	0.431798	1.41243
	0pA	50pA	100pA	150pA	200pA	250pA	300pA	350pA	400pA						(pC)	(pA)	(Hz)		13.6185	17.751	9.36577	29.7803	28.3653	20.3473	12.3741	33.1268	13.0391	30.2541	10.8409	25.6781	11.9603	11.6042	13.7908	34.2323	22.9512	19.5511	22.9386	16.0133	22.9381	17.6173	49.1449	8.97343			6.62252	0.315886	0.938527	0.315597	2.43427
	0	0	0	4.28571	7.14286	8.57143	8.57143	10	12.8571			0.0367347	204.725		14.5825	10.7789	23.4796		40.2062	49.752	11.3393	29.5922	23.3406	20.3218	31.7717	26.3999	25.1406	29.0916	40.8282	34.8899	19.1291	21.8118	14.7497	17.2953	43.7375	9.53884	20.5413	28.6375	16.0905	16.4661	9.24119	16.1785			1.01864	2.32558	0.497092	2.59338	0.586407
	0	0	1.42857	8.57143	12.8571	15.7143	18.5714	20	21.4286			0.0471528	158.033		12.8645	18.475	17.6012		18.5921	14.1867	19.6668	24.8704	31.1574	32.8374	14.9875	31.8889	16.0832	21.9492	37.3432	33.661	28.656	15.2072	14.0475	34.0759	16.1218	37.5544	19.8554	15.9598	9.84961	15.7343	16.7796	10.1436			0.745601	1.84094	0.476486	2.0284	2.09599
	0	5	17.1428	27.8572	35	43.5714	52.1429	57.1429	50.7143			0.114999	186.137		12.8523	16.2436	9.38001		12.7506	16.1513	9.57268	28.423	20.4993	27.3254	12.3711	42.0358	11.9122	20.0051	68.756	26.9322	19.5322	11.0492	8.31208	20.7514	17.8918	17.1567	32.0817	19.8201	33.6669	12.0921	27.091	13.8133			1.97123	2.13447	1.06473	0.242506	1.12474
	0	0	0	1.42857	3.71429	6.57143	12.5714	14.5714	16.8571			0.103359	115.741		15.3122	23.0241	5.3979		20.3513	24.7654	11.8517	21.7766	16.2201	20.9136	21.1406	22.2097	28.2745	20.6524	80.5554	17.945	15.8271	10.0835	25.1861	20.168	12.9969	14.8739	23.1916	17.7798	9.05055	16.4372	27.0089	8.18134			1.87652	16.3667	1.5569	0.027062	1.0101
	0	0	0.714285	3.57143	8.57143	12.8571	16.9048	20.9524	23.8095			0.0697548	124.829		14.3554	21.8627	3.96682		18.9956	14.7108	9.17864	28.1972	18.4082	41.2047	28.4465	236.608	10.7598	18.1087	17.8599	19.6177	17.1063	16.9134	10.8617	31.952	43.5948	34.5859	21.8067	24.6526	9.58834	12.2539	15.4346	10.7465			8.35415	11.5875	2.03957	1.68265	2.91459
	0	0	0.612244	2.04081	5.91837	10.2041	13.2653	16.1224	18.3673			0.0522211	122.28		10.7766	17.3074	3.71433		21.7336	19.2058	10.1262	20.171	21.9486	20.5132	21.6903	106.209	13.5199	20.3763	17.7451	40.5269	11.7851	15.3833	9.03139	19.1483	18.5904	18.8187	25.3162	19.8754	11.7394	20.05	10.9545	12.0048			6.80272	4.73485	5.08643	0.326627	0.532029
	0	0	0	0	0	7.14286	11.4286	15.7143	20			0.07	77.4174		12.5118	17.9194	3.29258		17.3901	24.1996	10.7013	18.7643	22.3285	24.0019	15.2583	80.9696	11.8247	20.306	38.1603	30.263	13.8073	16.874	11.287	64.9705	16.1236	15.4734	17.3583	15.7409	7.15691	12.578	7.89194	10.0977			1.43226	1.33245	3.34562	1.46092	0.901955
	0	0	0	0.714285	9.28571	13.5714	19.2857	21.4286	25			0.0750216	80.5851						17.0317	22.288	7.13401	25.9964	33.5568	19.8546	9.46905	25.0776	12.001	22.926	34.5414	26.2154	14.9522	20.3686	14.7054	18.4303	20.6226	19.7333	31.9799	14.5851	30.1076	21.6265	13.8757	12.1139			3.05158	9.83282	3.74672	1.22986	0.198425
	0	0	1.07143	5.71428	11.7857	16.4286	21.0714	24.6429	27.5			0.0715285	134.058						27.2431	17.9671	7.4675	31.0979	20.6894	26.8243	28.3083	38.9471	9.43976	25.1183	22.8864	16.075	11.0812	11.6835	24.2429	26.5772	16.4818	96.2282	19.989	12.1742	27.231	12.7542	12.3935	11.7138			1.03391	39.0629	0.517759	0.727273	0.670736
	0	3.71429	12.2857	21.4286	30.2857	26	27.7143	29.7143	32			0.153349	242.385						13.6037	33.8574	9.54409	16.054	21.1119	23.9569	24.719	24.6703	10.919	15.0053	47.5011	16.2582	18.0165	15.4016	13.8368	47.5913	22.3516	65.8184	42.5954	35.7214	12.0727	14.328	47.5861	14.0628			0.360946	37.4532	0.775674	26.1091	7.77597
	0	0	1.42857	10.4762	19.0476	24.7619	29.0476	27.8572	31.4286			0.113294	149.078						21.2221	19.7116	13.2759	17.6387	19.8383	17.1058	12.1238	16.7403	10.381	26.6027	13.5145	19.8117	17.5353	16.4685	12.6442	49.8365	18.638	13.1806	30.2577	13.757	9.90419	14.2356	11.275	9.60082			2.82726	6.60499	1.02187	0.453597	0.184966
	0	1.66667	3.57143	8.57143	12.619	15.7143	11.1905	11.9048	13.0952			0.139577	193.691						14.7624	27.4133	8.00696	15.958	27.7091	20.2299	13.0389	29.144	7.85839	16.4736	16.5188	14.6247	14.5623	11.5148	11.8126	15.7235	17.3661	114.557	33.4271	17.2078	20.0906	21.86	23.4728	8.85966			2.82885	7.58155	1.58228	7.09712	0.633513
	0	3.21428	8.21428	13.2143	18.2143	11.0714	14.2857	17.1428	19.6429			0.129892	169.927						18.9278	41.7095	7.24446	22.9886	26.0137	24.3099	11.9476	49.3239	15.1815	15.7332	15.467	29.5691	15.8509	14.2031	57.5801	50.512	19.8969	50.1936	34.893	18.8573	15.6525	13.8547	12.5792	11.1904			2.20653	16.4471	16.5018	1.16932	0.729237
	0	0.571428	5.14286	10	15.4286	18.2857	21.1429	14.8572	16.2857			0.0889808	126.708						20.1677	27.3213	8.00696	22.0307	18.7001	15.1789	12.7187	188.661	10.142	25.3406	26.5878	25.0993	36.592	30.0048	28.3589	23.1089	26.5443	16.0038	23.9497	20.0417	16.4214	10.8387	29.1958	12.8441			9.65256	1.02302	1.58228	7.84939	25.9058
																			14.448	14.1643	7.24446	17.4139	19.5963	29.1412	15.2535	21.8775	14.211	23.7909	44.6616	16.0244	18.7211	17.6254	31.9252	18.8982	15.8161	15.6293	36.597	32.1149	42.6555	16.3882	31.0073	11.8336			0.88629	2.12766	16.5018	0.784251	0.197758
																			14.605	52.5479	10.1728	20.4952	21.844	31.0825	10.6021	13.8205	11.9104	44.139	11.5381	27.2979	17.7556	16.2319	16.2014	33.8881	15.5994	19.4192	40.5686	49.0502	7.75243	30.3104	13.3384	9.28065			0.347174	0.204985	1.03434	0.084639	0.225281
																			29.7001	22.4407	23.9359	17.5482	29.6426	16.9233	46.8388	33.4802	8.62313	30.508	19.0268	29.5627	12.8213	14.0469	22.5923	21.6844	16.4265	15.9898	28.2962	19.6387	12.4495	14.6122	10.3853	9.97159			1.40627	2.16591	0.241185	1.34572	2.12812
																			16.5558	34.7327	9.64974	22.3231	22.6278	17.2007	15.755	35.7228	13.7953	19.5667	17.4264	13.9902	24.1637	52.5474	9.40351	16.2782	19.3906	27.1609	18.4237	19.935	13.2477	12.9593	9.02448	10.448			0.952381	8.96863	0.803859	1.90114	0.905061
																			24.3747	20.0723	9.46759	58.8092	21.42	19.5959	28.1876	33.7077	16.7763	19.4273	18.6282	31.8205	18.342	11.6548	12.9318	35.4269	16.2652	37.0888	20.8566	25.4257	8.30567	16.9172	18.1601	9.4426			3.20102	3.23102	1.69291	0.787029	0.424881
																			23.3535	19.6313	10.3246	17.2912	18.2639	14.165	11.0923	56.1157	13.853	38.5143	35.2051	104.084	20.2863	15.2794	11.7783	16.0385	14.0103	15.7091	29.373	12.8291	9.40016	17.0863	11.8376	14.4366			20.7902	2.11238	0.655867	0.250998	2.67883
																			36.7862	18.3774	11.9577	24.3825	19.677	42.4779	16.5084	137.083	9.35689	17.8543	11.5913	21.8954	18.6824	15.7328	11.4801	39.0233	29.5157	22.8919	27.4498	15.0237	17.7122	16.5963	87.7338	11.0063			1.20438	1.32573	1.48039	4.93827	0.619195
																			15.376	37.9432	16.5896	30.0992	25.1633	26.4821	14.2795	101.931	28.952	26.339	32.1562	24.0312	24.704	13.6693	13.6291	49.2579	23.5312	111.87	23.4399	28.4689	18.2244	16.3483	17.2341	11.407			0.691229	17.2414	4.31405	0.256654	2.56606
																			23.8606	21.218	7.47889	18.4484	40.3738	24.1569	11.7155	50.9724	8.22581	41.2745	41.3927	29.9615	15.6443	17.0449	13.3952	17.5821	26.7127	17.5338	35.6458	13.3577	7.35493	16.2574	9.38531	24.6185			5.73393	8.48903	39.8418	3.79653	1.12058
																			18.8247	14.3481	13.3415	20.7844	19.4128	14.449	24.9054	42.2098	12.1098	16.3149	21.7767	16.3674	16.3701	11.2579	13.3886	17.1192	14.3383	16.3745	15.8032	22.3034	7.87168	13.331	11.1178	34.2446			25.5094	16.835	3.18166	0.808601	0.352734
																			20.3959	16.7507	11.4289	23.6367	25.4616	28.5869	33.3489	40.8382	16.8278	18.9405	22.197	16.257	21.3604	16.3239	14.9481	39.2313	16.1736	27.5466	38.8923	24.2811	13.9611	9.99677	11.3186	21.1845			1.57754	8.13668	32.3621	0.674899	0.605473
																			26.2895	27.6167	9.09176	29.659	23.8069	16.8334	13.3642	44.5193	11.7749	23.4792	76.3397	28.4334	14.2097	17.0009	11.1921	14.0939	22.5244	12.5074	20.0238	15.9404	16.1565	11.7815	16.387	17.2896			1.68039	1.84026	2.30204	0.538882	0.493292
																			34.6452	15.8774	11.9884	32.2783	18.3213	18.6978	16.6367	20.2589	21.3152	23.7569	22.0879	24.8398	14.2701	14.4519	20.4955	25.3632	20.3252	14.8198	21.9566	24.2809	10.7836	18.1978	10.3263	9.95646			0.653253	21.6922	2.0284	0.414336	1.12574
																			15.6038	18.6669	8.78159	19.0858	19.2292	24.5048	12.4286	22.9218	12.7968	25.0888	36.9252	26.1021	16.1575	16.5994	8.79214	23.3125	22.1894	26.3088	20.8191	20.9996	14.656	12.3865	12.776	14.4773			0.755002	2.65041	2.19249	5.65296	0.320369
																			19.6463	16.7	7.23073	18.4808	16.6906	33.6676	14.563	29.4841	10.2286	26.6677	60.3799	39.8302	19.1399	27.2408	11.717	15.0096	35.6044	21.1362	19.112	14.7581	8.9497	16.764	33.8721	9.7348			9.54225	13.986	0.198216	0.060145	2.91971
																			21.9438	21.4972	10.8805	32.4128	20.6791	25.5109	17.4114	23.3302	9.22684	25.2915	29.9365	23.16	13.6552	14.8137	7.91223	21.5265	24.5493	24.9657	38.5614	16.7534	38.932	15.4173	8.24269	16.1414			3.59971	6.21117	1.69693	2.09291	1.08873
																			19.5497	38.2774	20.4082	20.2471	22.17	15.0531	14.3385	62.385	12.6706	15.151	47.9874	21.3069	10.7058	22.7458	8.93631	21.5994	15.393	17.893	19.8556	40.5819	29.6293	10.7259	9.81702	14.3123			1.98846	0.631832	11.7785	15.9501	1.10595
																			26.1435	14.9177	12.2392	15.9589	26.8512	26.9094	21.9823	197.728	12.4486	17.9946	11.8605	38.2521	11.6704	23.1052	12.8105	23.5232	23.2702	15.025	26.7628	27.5651	10.823	27.2698	24.4337	11.883			0.491136	17.4823	0.434574	2.43902	3.21132
																			14.2298	23.5011	8.47748	23.8318	21.2853	15.4935	15.8548	20.4967	13.2949	24.1404	39.3294	19.9715	21.3374	14.2182	11.1557	21.5832	16.378	28.4724	29.0799	17.6929	31.8124	24.1298	13.1973	8.69003			0.712352	2.05466	0.871765	7.84891	0.015188
																			17.2679	14.0189	8.71693	25.8118	29.5277	28.1207	20.062	46.9136	13.9034	17.1032	56.0372	20.0429	19.0535	11.9069	16.8148	33.7664	14.6995	40.5975	21.6232	17.4219	15.8383	14.0176	19.1061	15.1995			0.314465	27.2469	1.37931	3.31126	0.576369
																			33.386	46.2084	13.3234	21.9341	28.692	16.879	16.7206	31.4027	12.8904	13.6395	87.1105	19.763	56.4339	16.0733	16.2558	17.4765	45.5235	15.9932	23.0419	27.1766	7.60579	16.804	9.61209	14.7065			17.2414	2.0284	0.253024	0.747554	0.290419
																			17.7857	15.7203	9.79395	29.926	19.4154	35.3533	13.537	15.3364	10.9108	15.7611	21.7167	27.8556	21.2164	12.5996	41.529	189.118	20.5754	33.9283	17.8333	20.1421	14.6115	22.1541	23.1084	11.3303			0.612182	11.5341	1.09505	0.383966	4.64897
																			24.7014	37.7125	13.1926	22.2637	21.8004	21.4867	15.7573	40.9138	13.29	23.9943	50.0294	25.614	22.0753	17.0824	14.9581	14.9444	15.0165	82.9654	16.1157	25.0452	32.8945	18.4535	15.6954	8.28579			11.4286	5.00753	0.913992	0.462491	3.96985
																			16.8469	20.8502	7.50764	30.247	28.735	19.8288	10.2139	20.1109	16.4116	23.9094	31.9148	13.217	19.6214	21.4007	20.94	135.522	18.8784	16.6418	20.5021	17.1305	9.4242	16.222	10.1401	11.4433			0.608495	23.696	2.35294	0.385535	0.779542
																			12.9686	23.357	8.15875	27.0714	25.6769	17.0959	16.4262	25.1909	10.533	21.3391	46.5752	25.3166	12.4284	20.1699	12.892	64.283	21.0258	19.1237	21.8828	16.5253	11.8893	14.3223	21.0515	15.3138			5.13077	7.4074	2.3753	0.33206	0.198232
																			16.962	13.0227	8.03896	30.8457	17.6115	26.6565	14.2333	19.1269	12.6879	26.3269	35.0678	14.8475	17.0315	15.329	8.79734	191.165	14.4317	102.648	35.384	13.9626	22.5754	15.1412	13.8817	16.2556			2.09469	1.14417	1.39665	0.127431	0.087183
																			18.229	17.002	14.6568	34.897	15.1441	19.8774	21.582	15.4548	15.8838	21.7522	10.2316	19.021	16.762	25.6065	25.0162	95.6257	19.6288	20.6253	33.7021	9.57002	8.00286	13.1921	11.1757	8.02001			1.51998	0.13123	1.10375	0.320267	0.682779
																			11.2075	15.1578	6.80034	33.9793	25.6634	14.5394	14.199	30.9546	15.9551	15.3881	66.5426	91.9628	17.3581	14.5824	19.1432	104.478	25.4539	49.0158	20.4736	14.4548	14.8427	14.3214	17.6888	11.992			6.73401	3.45782	1.17329	0.738331	0.376903
																			19.1357	23.039	11.9631	30.7591	14.992	22.3422	20.7246	46.3205	9.68059	16.3904	29.4138	16.4499	11.3504	23.4102	12.2918	76.4917	17.946	17.0288	33.0201	33.0351	46.3431	14.9276	19.7263	13.3099			3.16159	2.68961	3.16558	2.41664	4.99512
																			23.4867	29.8442	8.98504	20.9238	31.7512	18.8605	14.784	16.5869	9.61923	23.4924	33.2507	26.0724	12.0618	23.0668	13.9619	54.6334	37.3508	24.9441	15.9043	14.5719	7.26719	16.6432	28.778	8.69483			5.64972	2.29833	0.883158	0.734863	1.5444
																			16.6437	16.1407	15.9244	18.3928	21.1443	20.3467	22.7599	14.3485	10.5029	18.1118	24.9954	16.4813	12.6691	13.4244	11.6101	19.7139	20.1584	42.0069	31.0388	16.2662	15.5852	23.5086	10.0493	14.7622			2.48014	2.9274	6.68896	0.160087	0.78345
																			21.4521	21.6849	11.4971	17.7589	16.289	27.1503	14.9352	37.0694	11.9141	20.9502	51.693	15.8427	20.6777	15.6291	11.5409	24.8408	12.0117	13.665	22.9111	29.7218	10.5678	17.4766	11.9561	13.7874			0.839702	2.25734	0.359454	1.11819	0.706117
																			23.7991	26.2313	10.0596	22.8407	19.058	44.1543	30.7832	38.1924	12.0568	17.4444	14.8561	12.3116	25.1135	19.8101	13.3449	46.8914	37.9172	27.2701	34.6505	14.8469	20.4719	14.7683	29.499	9.50013			28.6548	1.46714	0.710933	3.07692	0.544248
																			18.6221	24.7426	10.4735	23.2819	20.7592	24.5363	12.0602	46.4904	14.5926	16.1817	11.1786	16.2183	29.3131	14.7446	10.1228	40.768	24.5431	32.3349	17.762	18.9315	10.7821	15.0885	9.4344	11.2089			1.49231	4.11522	0.400096	0.339605	1.153
																			20.548	15.7291	12.1708	18.4102	26.9058	14.7137	36.7535	58.098	10.957	23.0139	26.2995	17.4231	13.1686	27.8468	24.4467	16.3407	14.6128	15.061	35.0358	15.1963	12.4475	18.8581	8.795	10.971			6.38563	18.1818	22.1721	0.175762	5.50656
																			22.9673	33.957	13.3758	22.195	19.2467	21.6299	19.5873	34.79	11.3399	18.0495	44.29	17.5148	16.7165	16.8594	16.1444	32.6904	14.3315	28.8516	42.8971	20.7921	8.96755	12.2523	24.3515	9.06385			0.701558	2.92311	1.16973	0.531491	4.61261
																			13.5771	34.0122	11.8237	22.6462	32.6816	19.9061	16.0636	16.9326	11.5579	30.2071	21.9532	27.2384	16.6143	12.0366	15.5102	32.5854	25.2649	24.0408	30.4923	30.4662	12.7026	13.037	24.9072	10.1063			25.7726	6.77966	4.5126	6.4725	0.429406
																			38.2852	25.9962	8.10772	21.5583	25.7719	45.8311	18.1064	28.8771	12.1627	20.9199	30.3645	24.1865	18.3374	12.9807	13.4461	25.8328	17.5588	37.6576	28.7758	13.0108	8.2518	14.0114	8.44451	7.94315			5.35051	2.01248	13.5687	0.940119	0.268269
																			32.5756	47.3053	8.9212	18.9603	23.6238	18.0427	13.0064	205.825	8.81365	24.0084	14.3199	17.5712	11.9267	15.5342	11.545	44.7231	27.1717	35.0749	28.7075	12.9546	18.2991	19.1488	17.7792	14.4009			11.4286	2.57732	2.59133	8.48189	0.613723
																			27.0414	23.769	7.64303	30.4927	19.6966	24.86	16.2242	120.611	10.0527	23.2209	57.1528	28.8331	9.78115	14.805	12.1793	17.9965	33.4702	12.3165	19.1571	13.7253	8.69032	13.4964	8.28351	16.1191			34.721	24.8135	2.43131	11.2994	2.89685
																			26.6977	18.0929	12.6966	29.0048	16.3247	12.8694	16.7097	29.1219	10.61	23.2628	14.8124	27.372	19.0108	12.7151	7.79772	27.3413	37.5726	18.9195	15.8886	21.2064	10.6044	12.1184	37.5406	12.2567			36.8985	1.91865	24.2149	1.50897	5.00234
																			11.9056	27.0208	7.72189	25.7486	36.3378	17.5328	14.0063	40.6738	11.5276	20.4941	33.3996	15.5779	31.811	16.6125	10.9713	61.2457	28.9109	17.2497	13.0125	14.0405	16.1339	21.1748	19.7301	12.775			10.2147	24.7524	4.84023	1.1798	1.0142
																			19.5682	54.3859	8.52876	25.224	26.7153	17.7859	15.8363	24.6817	18.1751	16.8351	25.3809	26.5793	19.2265	12.7539	9.72286	18.612	11.315	15.8211	27.4986	27.4226	10.0453	11.528	36.8445	15.3452			3.42934	11.4416	0.614439	0.577302	0.69789
																			22.0344	18.3483	13.5253	20.4697	26.721	42.9585	13.4981	31.4937	13.115	27.9746	56.2497	36.4586	13.9836	12.5732	8.20356	36.1558	15.68	22.688	21.6346	20.3638	28.4211	17.1569	12.3094	9.28295			2.1678	1.30175	1.90877	3.0998	10.2778
																			11.3081	18.6249	9.58784	29.6546	27.1024	16.5057	10.6159	23.4572	17.2015	26.5371	19.6772	22.9103	14.9988	16.4949	13.7165	17.4367	25.0143	14.2215	34.0389	12.3175	7.91545	10.7796	15.8485	10.8833			3.65897	12.3914	0.889838	28.0887	2.07684
																			27.2888	22.0165	16.0458	19.6024	15.9163	33.5438	11.7882	27.3588	10.7375	17.4732	12.8038	35.6138	18.4215	14.1978	18.4341	17.2438	30.515	26.701	17.308	15.9636	16.7977	14.8364	10.2382	9.97948			4.16836	10.0302	0.616257	3.44114	3.30903
																			22.0976	12.9751	11.8703	23.7501	24.1758	18.9351	23.6555	12.5722	10.9842	31.3095	15.4983	20.8257	32.4802	12.3589	32.9155	11.8371	18.4847	93.5676	23.6864	14.4202	11.7795	13.4459	19.927	10.4418			22.625	13.3511	2.74725	0.631834	2.45276
																			17.5091	25.8775	11.3123	26.4997	21.9647	20.5851	17.2438	45.0434	17.6225	25.1526	29.0059	25.4955	14.456	17.0631	14.764	49.0208	59.3831	14.2007	21.5739	13.3001	23.1702	27.5384	9.1225	14.5487			2.73373	3.91389	5.55857	0.75013	14.1844
																			13.9254	27.226	8.52986	29.6371	22.7611	39.5125	17.7826	39.7285	9.49354	26.114	63.9742	19.025	16.6173	14.2582	12.7494	16.842	55.7093	17.858	19.7113	12.3223	10.6508	19.4093	11.1709	11.0266			13.5873	2.80505	1.38677	0.221971	0.361807
																			33.066	14.8243	8.62617	17.937	33.3875	23.607	31.866	189.535	9.96298	18.7795	74.0948	17.683	13.7592	15.2806	22.1029	18.0657	17.989	16.3045	28.8325	12.4195	19.9598	12.7421	10.9441	15.1625			0.998802	10.4275	1.39373	2.22026	0.256865
																			22.0135	16.1555	15.8268	29.3025	22.7577	18	12.3299	213.748	6.62126	29.3079	19.0264	22.6334	18.0512	13.5047	13.9965	38.6063	21.4396	21.8687	31.9712	10.1534	34.4007	20.577	19.9459	15.8925			11.9186	0.155533	0.935806	6.42668	17.0349
																			18.1337	26.2225	8.9167	27.2309	36.6131	19.0152	18.0777	33.8788	8.84049	17.4845	52.0874	17.8672	16.1005	16.0185	9.61725	28.9044	17.2222	23.7367	19.4613	41.529	11.7243	16.2239	9.39177	13.2098			2.25225	6.44746	0.597371	4.56003	3.02944
																			15.9447	17.8283	6.13521	21.7786	21.7841	30.2601	31.1895	19.3228	11.0504	29.1866	36.9833	20.4168	17.6022	13.0771	9.53687	15.9282	18.9991	28.4547	31.9244	13.7473	10.4593	15.4366	26.8286	13.0303			2.06783	1.88572	0.579072	1.23395	1.1089
																			22.3016	21.3994	12.4391	20.6224	48.1794	14.8391	14.2683	183.245	10.778	18.3385	14.1396	28.0625	36.6969	53.382	19.797	19.6663	25.0326	40.4868	17.5183	11.6302	31.8002	14.1572	24.0519	9.77811			6.67988	20.7473	0.839702	25.5132	3.3647
																			24.0631	33.9832	8.74377	22.6713	30.1758	27.9469	17.7082	197.836	11.8809	20.6858	40.0148	12.3877	20.8248	21.1186	50.1972	16.2715	15.3291	27.2506	31.9842	22.5618	9.14141	11.1838	17.2893	10.6233			2.68457	2.04875	3.55492	5.41112	0.842737
																			19.9302	23.0214	9.79744	36.4529	22.7825	35.2759	13.8929	27.9484	10.852	18.2315	29.7607	29.3113	13.3942	10.871	10.4782	43.284	15.1381	16.6465	31.6595	24.6123	8.64627	16.2035	56.5288	10.3433			0.605914	2.96475	0.737355	0.502311	1.5456
																			25.2825	16.6699	8.07994	19.0723	16.3177	27.8053	19.334	16.2293	10.9714	16.7541	14.7432	40.2719	20.1111	14.6614	12.3174	32.01	16.7271	13.3123	22.4722	11.4266	12.4483	16.3631	51.3828	10.051			6.96372	1.04308	0.997308	6.80272	17.6067
																			18.7212	16.1059	6.71407	26.5705	24.1783	60.4174	21.6917	23.725	11.7294	23.5844	45.6921	17.7784	20.0041	14.8023	10.0841	24.8565	22.1912	13.184	26.7636	29.9241	28.4363	9.73253	21.0951	12.0811			2.94293	0.775255	0.431295	1.60746	0.226076
																			2E																										2E
																			CTA GROUP, n = 24 cells																										CTA GROUP, n = 24 cells
																			sEPSC AMPLITUDE (pA, 100 events per cell)																										sEPSC INSTANTANEOUS FREQUENCY (Hz, 100 events per cell)
																			Cell 1	Cell 2	Cell 3	Cell 4	Cell 5	Cell 6	Cell 7	Cell 8	Cell 9	Cell 10	Cell 11	Cell 12	Cell 13	Cell 14	Cell 15	Cell 16	Cell 17	Cell 18	Cell 19	Cell 20	Cell 21	Cell 22	Cell 23	Cell 24			Cell 1	Cell 2	Cell 3	Cell 4	Cell 5
																			10.3899	14.0317	13.6536	11.7531	27.2889	13.1783	19.9947	15.4345	46.235	16.5936	36.0663	16.1925	44.7709	23.313	16.9275	16.6156	12.8912	24.8274	16.5289	30.8692	18.8453	10.8595	11.1868	13.2134			0.022046	0.230245	0.168175	17.9212	3.16756
																			12.702	36.6333	15.4712	8.99458	44.7026	37.9136	12.5686	11.7604	14.2841	33.8523	33.5852	15.7798	18.5128	31.3714	15.2622	44.2214	13.485	27.4713	15.4491	16.8145	17.768	11.1773	13.8752	15.3637			11.9192	0.498058	3.33223	0.651678	0.785608
																			8.48692	13.656	26.3124	8.23209	9.52881	17.2252	26.4128	17.8422	46.6689	26.818	19.9389	17.3644	21.204	32.6215	15.6898	21.654	12.2285	30.2999	12.3887	17.3707	24.1851	7.94768	10.4672	16.7499			0.271599	0.258138	0.691706	0.595664	3.40484
																			12.5612	15.6845	16.4432	11.9786	10.6004	17.1856	10.6425	10.306	12.4853	20.7435	20.2581	18.6379	31.054	26.1086	12.4872	18.7187	18.7735	12.8151	11.4369	28.2326	13.5364	33.0145	11.2376	18.6716			0.115479	0.410543	0.396024	1.74856	2.26244
																			20.7078	17.3548	16.5873	14.9054	10.6058	20.3119	19.8389	30.8755	26.8336	25.0482	38.4141	36.5136	16.6701	31.2177	17.3813	23.5436	18.3021	17.4792	14.0532	16.5883	7.88219	12.2838	11.9361	15.4888			0.077198	0.14444	0.683433	1.97589	9.77517
																			22.8848	21.7229	26.6625	10.153	8.92192	13.8778	11.2289	44.2947	17.3968	15.9105	66.4094	18.8304	17.9675	14.8605	11.43	27.5943	73.7024	22.9358	14.4349	14.2402	16.9048	10.5085	9.86196	17.1435			0.109267	1.46392	1.6239	7.17877	0.858959
																			8.86645	21.1416	28.1232	9.28935	11.0423	33.4475	19.3432	25.8665	33.2251	17.6812	13.3396	20.6443	24.2007	15.0272	13.388	33.1349	20.1919	16.6196	12.4665	28.684	14.2656	10.4147	9.12793	16.9419			0.133733	2.43427	0.545673	0.374504	1.97785
																			10.2982	31.0267	29.9526	12.3543	10.8229	21.5872	19.2437	16.3066	9.58038	24.4669	44.9645	29.6248	18.395	18.2381	39.488	49.0374	13.8735	16.0746	11.7043	35.7149	11.3591	7.74617	9.36631	33.2372			0.222069	1.04932	0.183976	40.3229	1.92123
																			15.0399	59.1722	13.1685	8.75595	15.5932	14.4839	11.2075	11.2159	38.6281	22.4145	52.7628	17.7915	16.2513	25.5353	64.8642	29.6028	23.9912	16.1893	20.1898	19.0227	10.1955	8.13402	7.6234	20.6504			0.134637	0.07567	1.09854	1.93949	3.3761
																			12.5026	19.0198	22.8345	8.6104	10.1807	28.8243	28.2843	18.2748	13.9393	26.4154	15.2335	10.8669	18.2975	22.1165	50.9482	18.5671	43.3553	24.2199	9.82742	16.8297	6.34622	16.4952	8.28408	15.4858			14.9918	0.332602	8.60592	10.3842	2.02881
																			31.646	18.8351	16.7991	9.99165	10.178	13.9619	13.2129	30.3413	17.6826	17.6921	25.6545	16.4775	44.3121	27.1073	18.1102	19.1103	10.7745	26.111	13.7468	20.6909	15.1966	11.102	10.7038	21.197			0.117872	1.94212	0.909007	0.845094	3.26158
																			10.8313	16.1161	16.1293	7.58162	19.1955	19.3926	30.2737	13.3657	11.7571	16.5428	27.3107	29.6806	26.1095	19.8332	22.9401	36.0191	9.79566	23.045	15.8341	30.6102	25.2133	8.86583	11.1975	24.5463			0.208368	0.31839	1.25865	0.656944	2.76015
																			16.8171	39.7839	30.0865	10.4078	16.5877	19.6317	8.69624	12.4846	11.1845	15.6861	20.9512	12.1667	16.2872	17.7915	20.8953	19.887	13.4358	32.6743	15.705	14.1578	5.72919	12.747	9.92726	29.9907			0.754659	2.37868	0.332127	0.311915	6.50194
																			16.0594	16.3233	11.0979	10.0215	9.05208	37.8229	10.6979	16.3183	10.8045	21.6076	23.3682	23.8436	17.2615	17.3405	35.6422	35.3376	41.3331	14.3991	17.1308	35.8852	7.5196	8.88518	12.6875	17.2169			1.9631	0.576269	1.00331	0.32438	7.326
																			16.9068	12.9109	21.5081	8.50474	8.56974	25.0191	25.6611	15.4964	12.63	17.7022	22.4349	21.266	19.4873	19.0649	28.5593	17.6842	13.9267	14.0194	10.7236	17.334	20.069	8.44487	14.4625	20.3511			4.24277	0.125693	0.505996	0.983962	2.43783
																			19.589	16.6943	11.8012	9.48683	11.3028	25.546	12.4566	10.7112	17.9348	22.0135	17.9355	11.6546	13.9943	17.8969	33.6699	27.5724	16.5273	25.2499	11.8968	17.1141	14.5235	10.0432	11.9251	16.0581			1.6975	2.19588	1.31337	0.679579	18.4844
																			14.7061	55.2601	11.6483	9.28483	16.2823	18.7394	19.4857	13.9789	11.5519	26.6746	37.2779	21.9818	15.416	15.506	13.6025	12.9058	13.8701	18.0655	14.5573	25.8109	7.27266	10.1925	9.43776	26.018			3.45544	0.39992	0.930491	1.75593	8.49616
																			14.0915	14.2185	11.9082	9.82921	20.8799	30.2845	22.8327	11.345	20.7594	21.3217	17.5846	27.1	37.2652	30.3387	26.0734	31.2136	24.3745	17.5883	16.5234	16.3824	18.1128	14.6382	8.96301	15.7282			0.04202	0.138213	1.25913	0.612295	3.25945
																			17.3766	18.2233	25.6607	9.92272	24.4521	67.5511	13.6595	16.1162	25.5182	28.7768	35.5672	31.4512	18.2129	10.6129	9.49271	17.0841	12.8919	35.5115	11.0459	24.5193	16.9128	17.4668	10.0698	16.3503			3.56755	0.338066	0.725637	0.294239	1.32048
																			16.4601	13.9605	11.6821	9.04714	20.0649	18.1123	25.4799	10.4351	10.7333	19.2473	31.6898	20.004	14.3965	38.7133	23.0117	18.0516	17.4468	31.9787	12.4576	10.5241	9.49822	14.0227	9.76676	18.8206			6.40224	0.229416	1.06281	5.23287	4.05515
																			17.5797	27.2402	15.7588	10.4145	21.3272	25.2976	11.8584	19.7706	21.0598	14.553	17.3303	22.109	20.4648	13.7892	13.2506	21.9242	27.4701	12.741	16.1714	16.495	13.6766	9.15683	12.2458	16.7056			1.83586	8.03213	0.897506	0.245586	0.846597
																			18.3613	26.933	17.3913	15.3778	19.7213	16.3484	13.2969	11.3611	18.2911	18.8032	16.7525	28.5251	23.9078	32.6232	15.8117	20.4052	13.4426	16.7294	12.9403	11.5219	9.23951	16.8144	8.77987	15.0026			6.09756	0.59873	1.63506	1.06815	2.50752
																			12.7303	11.6529	14.3911	15.3511	10.0244	32.6085	12.4898	9.40969	21.6567	21.2139	31.2741	11.5035	40.4918	23.7521	42.527	26.796	29.8799	39.0065	12.9055	18.6777	14.2082	9.45519	9.4898	18.2731			3.15356	1.04026	6.64883	2.30788	6.66667
																			12.3467	18.3125	13.1821	13.5436	12.717	23.7949	15.0514	14.5498	12.1096	12.5579	45.2322	17.1319	22.712	23.402	19.8434	14.8217	19.7811	25.8751	11.9415	11.7518	11.995	8.25437	10.5774	14.0149			1.65153	0.164799	2.04207	9.02523	0.912575
																			19.077	18.0143	11.6256	13.4827	15.1321	18.4344	8.93328	27.8084	13.9687	24.9008	37.5281	27.8941	18.5148	27.8233	11.3334	28.4126	14.0638	18.9032	26.1646	16.5915	5.37942	13.9469	9.9922	16.9442			8.78759	2.25326	4.10342	0.734268	3.12208
																			18.8109	23.2074	13.8161	13.2532	16.5167	21.7796	11.6165	10.3408	21.6874	15.7351	31.274	19.7911	12.3407	18.1843	11.8075	17.0047	13.1431	18.5814	12.7004	15.2217	13.678	16.6357	10.9029	18.4869			3.02937	1.16063	0.091135	0.350963	1.12196
																			18.2204	23.7078	12.1649	9.0629	12.9936	25.9035	26.9125	28.8044	16.3233	44.895	18.3932	31.6875	16.3395	18.3246	13.1136	23.491	11.6377	15.3062	12.8439	22.971	8.23381	21.2306	9.28626	14.6225			3.24461	0.862589	0.899442	0.171005	2.91036
																			16.7898	13.1578	9.98237	7.54208	13.4454	15.2091	12.6349	14.3503	20.015	44.2996	15.9336	50.7518	23.3158	19.9225	16.963	22.0872	37.6829	17.6695	11.87	13.9232	14.9879	6.78285	8.50883	14.782			1.36333	0.362543	11.0013	0.229137	8.21019
																			14.5681	52.6693	9.40003	20.7849	10.417	23.2208	28.332	17.8283	11.8077	15.7162	35.0169	19.3609	16.4003	15.8028	16.4422	44.3818	24.1369	11.1061	17.4107	18.0467	14.7208	10.4879	8.44835	24.0909			4.84042	0.040114	0.503346	0.562651	0.369235
																			17.635	20.2018	15.7407	15.8092	9.35641	32.5494	9.42207	9.63345	13.2216	21.3715	18.5115	16.7266	26.5269	34.2148	46.39	34.7485	22.7031	23.245	11.7254	14.8551	13.2936	11.1512	10.2885	21.0206			9.75609	0.969084	0.294829	0.438847	0.760862
																			20.5469	26.8825	16.9805	8.49397	17.4326	11.6924	20.1999	30.1954	12.7892	29.1541	20.1233	11.568	14.8981	18.6252	47.5905	25.6623	19.4319	13.3329	37.8768	18.9995	14.9067	8.2945	8.27697	37.7422			0.515888	0.521839	1.25897	0.50638	1.288
																			18.7345	21.7037	10.5341	11.171	10.3029	28.4264	12.8014	28.4995	31.8349	30.0265	16.0464	25.5033	18.62	17.5066	22.2293	36.7283	74.1761	15.9252	15.516	16.8819	6.57274	7.98475	8.31425	20.7104			1.23381	0.256562	0.956662	0.391298	4.0783
																			18.9035	11.6896	10.9556	7.65842	15.163	19.3995	9.27458	14.4091	11.8731	17.6327	37.3274	30.1348	32.3875	24.1746	9.52503	29.7921	29.1462	20.2338	12.5756	12.1036	26.3639	9.39519	9.42184	16.6095			2.48756	8.20357	2.50188	1.31787	1.28684
																			17.6544	22.5394	15.3265	10.4072	10.4442	21.9955	24.1023	16.716	13.8178	26.3187	15.3279	14.7097	18.9429	18.5381	18.428	16.4655	24.1279	36.3874	16.114	16.6578	16.1612	7.08469	12.1158	17.8293			1.9172	0.347355	1.72562	0.31905	0.463908
																			16.8636	17.3133	19.6535	9.87265	25.0837	64.0655	13.1313	22.6591	59.66	15.9993	26.3282	10.9466	34.9697	49.7419	18.3554	28.6683	16.7536	14.2438	16.0231	18.103	14.7571	10.0535	8.88289	14.3413			2.38095	0.508855	0.356786	1.46585	1.53775
																			13.6838	55.6618	25.105	10.0763	14.9235	21.7814	17.7674	9.86783	16.9249	17.1326	12.9549	13.236	23.1489	19.3301	48.1759	22.2581	23.1032	24.4551	53.3008	19.6229	23.4586	13.0907	11.0955	18.1722			0.768104	0.087227	0.543301	2.29568	2.92996
																			17.8701	27.2886	12.5683	13.3014	14.8039	12.5249	18.9199	8.13272	22.8938	17.6578	24.8405	10.5038	16.0754	31.5214	25.2111	30.4265	14.3266	19.9595	16.1212	53.1721	36.7757	10.041	8.96217	15.6265			2.33262	2.48756	0.125282	1.78349	2.92228
																			18.6847	53.095	19.1752	20.4346	13.6268	20.2155	7.39585	9.35927	14.1091	28.3499	69.3279	21.5277	12.3705	34.2506	16.0117	16.3942	15.6018	15.5342	8.03058	48.1485	9.88926	43.2153	11.4914	19.2686			4.80336	0.34848	0.769587	0.373594	2.48262
																			21.3502	16.9276	14.979	13.1821	13.1541	20.6748	15.7017	7.97572	14.5903	19.0636	18.983	35.5468	16.385	22.8013	8.00429	47.5199	22.0676	31.0739	11.5907	21.8467	13.5203	9.96836	11.3794	16.5831			8.47456	0.308708	0.616599	0.758955	6.62252
																			26.6863	19.6599	13.3529	8.41984	13.7399	20.6982	16.2996	13.935	37.9008	16.9545	24.8515	20.6448	16.7279	16.4659	26.2515	27.1771	24.647	11.883	18.3076	13.8668	9.91539	26.7424	12.4141	11.6455			3.8007	0.614212	0.387072	0.608495	3.07125
																			19.9378	21.9494	17.3361	9.50049	18.3263	17.1798	10.6189	18.1878	9.32484	12.0016	30.3363	21.2013	17.9174	14.6693	20.3222	24.7676	19.7447	21.8239	15.9152	16.6658	11.326	16.9786	11.3386	14.7339			1.70331	0.975521	0.554109	0.032527	14.7277
																			20.768	23.2055	10.0866	7.37525	24.021	25.6301	10.8802	8.98152	16.6909	28.6532	31.567	13.3137	17.9101	19.1967	20.8568	16.1245	20.1684	25.7054	15.0003	14.9334	7.24387	17.1673	13.6789	16.7048			3.76936	1.48853	0.731636	0.330349	2.61438
																			15.4641	17.004	10.4223	8.43689	17.5511	23.6309	24.3002	18.2827	11.3183	36.9508	33.9557	16.0741	30.0885	20.4811	16.3405	37.0838	16.2974	18.0659	16.9665	13.1915	6.6436	9.31612	10.6458	12.272			1.8765	1.34355	0.803601	0.498132	1.14969
																			13.8865	16.9397	14.2136	15.5728	11.2939	26.4558	33.0929	12.5337	13.3579	22.8281	13.4314	54.6982	28.089	15.7056	22.3317	14.9808	35.1856	22.4969	19.68	23.5751	8.14178	57.0319	8.75349	17.0276			4.11021	0.431574	0.802759	1.33941	12.0773
																			20.752	16.1311	18.1921	7.61122	11.0636	31.146	18.8395	12.7103	13.4551	15.4131	25.7281	32.8822	29.6975	17.6204	11.3434	29.8339	10.8118	14.8604	13.4087	17.6472	29.7516	10.345	9.78066	18.4876			1.39741	5.13602	3.78934	11.6821	0.617818
																			18.5316	26.6166	14.3434	10.0128	19.9973	21.0669	11.9223	15.3435	15.4635	30.3888	19.3956	14.9117	16.2323	21.5081	16.4897	27.6605	43.4582	13.2985	26.1362	18.5156	10.644	10.2199	10.7484	16.4042			3.67795	1.72563	1.54607	0.347851	6.49351
																			22.5564	58.2393	36.0294	7.85727	10.1068	20.0398	26.5656	13.6512	10.6818	40.2815	17.3335	25.4457	16.3059	19.649	12.8949	30.9086	10.5099	20.6677	20.4525	13.5988	23.1761	39.2095	11.7433	9.50883			0.969829	0.116081	1.02934	0.127197	2.36351
																			18.7456	18.0559	11.1511	8.89911	13.2091	33.1516	14.3188	23.2927	14.9754	29.8294	16.027	17.2939	22.4483	20.2668	13.7792	23.8674	28.0873	22.2017	17.7874	12.6019	10.2304	25.0322	10.615	15.998			4.15801	0.411557	0.916256	9.64291	5.81055
																			12.5694	15.2538	20.8454	11.1176	10.9096	31.5766	12.3029	23.8294	21.6557	21.4515	15.9598	11.4031	14.7941	27.0278	27.5339	19.1056	9.3163	13.075	14.7773	13.4507	21.9392	12.1882	9.07085	30.855			9.25923	3.80805	2.49189	0.344637	1.04811
																			20.8074	17.2602	20.471	8.9491	18.6005	9.28402	10.6354	19.8658	9.92352	13.1409	11.0456	19.6958	15.9407	16.4955	18.5384	18.5033	14.0992	16.3502	32.1411	13.6955	8.18849	10.7366	10.203	24.3917			2.05089	0.418848	1.86047	0.295779	1.63265
																			20.8176	14.6709	14.4729	10.0834	12.2797	25.5637	11.996	17.1154	12.5015	28.2278	22.359	11.5658	12.7216	20.662	22.5862	34.6002	13.38	18.3	15.6292	25.2255	9.61074	29.594	8.58587	14.4015			0.704179	0.214247	2.50188	0.150841	3.28299
																			22.1485	17.9465	12.2248	12.065	13.9367	23.3568	13.4826	24.1014	12.0246	15.0725	18.6357	13.1083	27.0867	56.0785	12.7878	13.263	94.8785	15.5929	13.2316	17.3212	8.19345	14.0978	10.3942	18.5898			1.05999	1.01266	2.59806	6.08625	0.858738
																			17.9504	17.3509	12.4857	15.9632	10.0359	17.2776	22.3932	15.0496	25.2493	22.361	17.1754	12.1045	20.6204	22.7641	40.9811	32.9358	38.3573	22.0599	10.981	17.0013	6.66469	12.4324	11.9884	17.5104			2.44144	0.098271	2.47219	0.455001	2.21828
																			18.7588	19.9596	18.9708	12.4171	15.6572	49.2885	24.6391	14.7783	9.63617	15.4035	27.7595	57.497	21.8754	20.3976	11.5398	10.023	17.1336	20.9842	13.4964	15.0896	9.62828	22.6692	9.62407	18.295			4.97744	1.95581	1.7581	0.053275	1.51515
																			17.5997	26.6221	42.9815	7.55992	10.654	31.5341	25.712	11.7369	18.0811	18.8572	22.9133	24.4691	33.143	12.0986	18.8091	36.3026	12.7853	28.4419	13.7821	13.2301	12.6429	9.14938	9.76726	40.9525			4.49438	0.826788	6.72941	0.257779	1.51814
																			13.05	42.0241	12.9554	9.88278	20.5444	17.4232	16.3019	8.42875	10.5415	36.2568	21.1899	18.8499	26.9521	14.9444	30.7006	28.3138	18.7706	16.1947	16.4405	17.8954	29.1075	9.3452	10.2058	26.2594			1.25392	0.46066	13.0042	0.670645	1.45645
																			23.2145	19.8999	15.1905	8.82555	11.3463	28.305	9.51007	14.5773	15.0654	14.7788	20.5405	28.1749	21.9842	19.0021	26.1595	21.4868	12.8173	13.957	13.5794	19.1253	16.8403	11.1724	8.01951	20.687			1.28123	0.535475	4.57241	0.759991	8.1037
																			15.8146	17.3515	22.3838	9.83824	12.5157	21.9595	11.9436	12.4281	10.1254	18.1577	24.2626	12.7755	15.151	36.597	20.8324	22.2905	35.8377	44.3939	17.1694	20.9257	14.8346	13.4216	8.35714	22.6893			3.74817	0.407664	1.60282	0.275429	9.37214
																			13.2899	37.5006	11.6256	10.0181	35.9254	30.5183	21.5318	16.513	12.0049	11.7456	48.8486	18.9583	17.379	13.3915	41.1344	16.573	12.6865	18.726	13.4241	14.881	6.95706	12.159	9.11114	19.4268			4.21413	0.433163	2.79171	0.142318	0.737029
																			16.0726	17.4571	22.0309	10.0836	34.867	20.6089	25.2437	23.6885	23.1483	17.315	34.1078	22.0397	16.6799	16.5867	19.8481	62.9827	25.4126	15.8058	17.8084	14.5525	17.6774	9.70624	8.68869	18.4722			1.29048	0.079127	24.8786	5.03521	3.43643
																			17.9015	20.5333	16.5525	17.1081	14.6096	34.0162	14.6503	13.6207	24.1865	24.3999	14.5425	18.2576	20.563	27.9265	19.1962	23.9698	13.5796	15.5437	16.6498	29.942	9.26162	11.1802	7.98771	21.231			3.40028	0.260403	1.25723	1.08307	12.1212
																			19.0495	57.8836	12.5725	9.94562	9.12067	25.2646	20.5186	13.4261	14.6502	18.2999	26.4759	32.8954	24.7822	59.9456	39.7395	16.2257	19.9544	20.734	15.7735	24.783	15.5103	13.183	12.5214	16.4324			1.50351	0.905227	0.401557	2.12586	1.96889
																			17.0575	18.6123	20.1291	13.9218	26.1198	19.913	14.0915	16.3996	11.1992	16.1566	30.0927	30.0439	19.6131	14.1101	23.5905	21.9348	55.4813	21.9109	12.9605	12.6091	9.41621	9.21758	8.74689	14.0069			1.86638	0.115443	1.43885	2.06568	1.47776
																			13.4567	15.0092	19.5678	9.13258	11.001	29.3911	12.2256	16.6404	42.8218	23.4566	31.5261	12.7171	14.3505	32.1912	25.1561	14.6572	10.2797	15.3201	14.1279	19.2596	21.7299	10.6342	12.7299	12.3194			2.41255	0.125335	3.66973	0.206971	1.23793
																			21.7571	17.1337	25.5783	9.81881	10.2052	36.5796	15.4002	36.1943	14.1727	16.0868	17.5886	18.3918	17.502	31.4917	8.56634	27.488	22.5397	14.5364	13.3326	15.8585	7.634	13.0795	10.1515	14.2844			1.62867	3.00033	1.66612	0.672764	7.98094
																			14.8158	15.6408	21.6245	11.5537	56.0556	28.3868	39.6332	15.7655	15.8385	15.4121	47.1926	11.5849	16.9399	25.6299	12.768	25.0593	16.1391	17.447	15.1219	13.9231	26.3502	12.9387	16.8571	12.5344			25.7028	3.82546	0.85977	0.698035	2.28155
																			16.5236	21.5319	11.3546	7.38072	10.3261	22.0934	31.3519	10.6728	50.2492	17.5843	18.0529	21.3142	22.269	23.9751	14.5831	14.1463	16.2161	23.2769	18.5947	18.3394	13.4506	8.62465	10.2612	15.3266			2.96475	1.46607	0.041606	0.445712	2.81373
																			19.5136	21.7872	10.6005	10.4669	8.97039	28.2632	15.6903	9.95673	48.3129	16.5258	22.2748	9.47799	26.1962	13.1586	28.3008	40.023	11.8253	18.7376	17.1515	15.5105	12.2593	17.5538	7.71427	24.7815			6.41025	1.1558	1.28634	1.80539	2.4857
																			17.161	16.9566	18.3619	8.3736	20.1667	26.4896	9.91667	18.9619	14.8309	18.0868	18.5774	33.1833	21.0708	26.5946	18.5665	21.5125	86.2316	29.3269	14.0011	23.0962	7.55402	37.9225	11.585	39.115			2.01734	0.427405	0.89413	1.90004	1.53327
																			16.2651	16.819	17.9709	12.0237	15.0885	20.5412	22.5538	17.7585	15.9125	19.3377	40.5815	19.4665	27.1749	21.9506	20.286	17.4991	19.9833	20.6299	17.4547	17.1635	6.11962	8.48324	9.23717	16.5512			7.38604	1.69176	2.17439	0.079347	0.683433
																			15.3625	28.6276	13.5503	11.4814	11.9207	9.57739	11.9243	12.3315	17.7468	19.7526	16.6316	18.2829	18.5805	17.8749	13.5029	14.914	11.4724	15.0611	17.3744	15.1149	21.2912	9.31068	13.789	20.7059			1.55737	3.44114	2.34085	0.930496	3.68868
																			16.1327	18.1519	13.3838	10.4879	21.3241	14.6683	29.8312	14.72	17.2983	18.675	29.3472	10.6789	23.7777	18.1771	13.8639	18.9731	58.4403	22.363	15.342	31.55	14.8153	23.6329	12.6423	14.1432			4.55387	1.42959	0.343643	0.262192	4.82859
																			13.522	11.596	16.994	7.60248	12.5825	19.2661	19.1397	17.5604	12.8364	17.4682	41.6349	24.7894	16.5226	15.6959	17.7394	36.3471	23.7041	16.3057	13.1633	24.369	11.4627	9.74408	10.0814	15.1823			15.4328	1.13534	0.646661	0.237023	7.07711
																			19.9847	19.2403	11.1225	9.45378	12.2607	22.5652	18.5505	20.1483	18.8374	17.8508	19.5829	10.9036	15.6637	32.2554	10.7223	23.0355	15.5184	15.3504	15.1883	13.8269	6.35921	9.98129	10.2371	14.3907			1.32871	0.523451	0.900172	1.03885	0.880204
																			11.6015	25.7915	21.2498	8.3976	7.80003	19.1075	13.2449	10.7691	17.6463	16.7318	27.7923	19.8472	16.9922	29.3842	10.0228	25.3408	9.14426	21.9439	18.9983	18.8626	11.8513	16.1	10.4735	32.2409			8.37586	2.26757	1.97123	1.17592	7.92384
																			13.4183	13.2143	14.9958	12.4807	15.8073	63.3356	9.62809	19.9153	16.6304	13.7156	26.9382	39.6737	14.3727	46.3346	31.235	15.8714	15.5088	32.1125	13.8436	17.8425	16.6604	17.1812	8.65722	21.7326			15.1983	0.272442	1.27503	0.284236	8.56904
																			16.1391	14.8272	26.8146	13.8232	9.59291	22.1665	9.93322	11.2127	13.5858	12.7585	16.7862	14.2668	20.7649	20.1578	21.2932	30.9209	16.4366	19.3627	20.9608	25.7831	15.5393	9.72141	10.4258	14.0707			0.842316	9.53302	0.543626	0.124642	14.3474
																			13.0617	16.3734	18.8272	12.8539	15.5143	27.4148	31.4388	13.6482	10.8537	15.7761	30.9433	12.497	22.7996	16.6941	21.1678	25.4884	16.5598	13.9945	16.3095	12.287	6.2913	11.4613	8.71664	15.4224			10.6613	0.827948	2.84571	0.526511	1.05731
																			19.7456	26.2421	19.2282	8.9154	10.0265	26.9133	27.0979	14.4422	12.8388	20.9546	33.9525	19.3325	21.1704	16.4086	20.4185	25.823	11.0378	16.045	14.9156	13.6534	12.3447	19.5183	12.9759	12.8857			2.7972	0.084816	1.9429	3.18773	1.83116
																			18.1678	16.5251	22.465	7.24784	9.97074	19.5576	26.5908	11.7949	21.002	23.5086	18.4083	17.6366	23.8296	21.4872	26.2457	11.9798	28.9879	27.4184	14.3004	12.6581	19.0768	26.9378	10.6176	26.1379			1.01947	0.382775	0.350483	0.685353	0.926182
																			18.1117	12.5096	20.4696	9.75413	18.5011	20.3346	16.3034	7.96593	9.58208	30.8353	26.2589	13.3446	24.1998	51.4352	11.8046	23.8108	24.9092	17.2206	14.5705	29.4667	7.69634	8.5034	11.8728	14.6208			0.033938	7.00794	2.08073	0.355138	1.62338
																			18.3633	13.3169	32.4208	7.84518	9.88498	43.4251	21.0566	12.6209	12.5108	30.8156	16.6013	14.1109	57.2164	25.8218	18.0247	16.661	17.7525	48.2509	31.4702	20.353	14.3174	11.8381	9.21889	20.2802			0.582682	0.832986	1.34283	2.69616	1.23625
																			17.6278	17.7167	34.2133	7.27242	39.028	20.155	7.71232	16.6538	15.039	17.3228	25.1967	11.6204	36.9942	54.6488	17.811	36.3701	15.0749	15.5168	11.7446	26.1571	14.6223	10.5531	10.3255	26.8587			25.3869	0.820476	2.97792	0.806909	1.54536
																			16.3227	38.004	13.9025	8.81566	21.0008	35.3587	29.5611	10.7576	11.7695	24.2341	16.4637	20.6987	16.7426	20.6447	16.57	26.6283	11.5575	18.4092	25.2225	18.0385	9.59966	8.59001	8.91555	14.6186			0.538154	0.345435	13.7931	1.13339	2.26244
																			17.3108	21.3027	17.4131	10.584	15.5702	35.402	9.92342	16.4985	15.4053	14.4307	37.8124	12.5957	23.344	21.3112	13.941	28.9507	51.4358	28.0352	14.6581	17.771	14.0233	11.7057	7.33928	10.9479			9.37182	2.19977	0.104747	0.878198	18.3823
																			16.348	20.8003	14.2485	9.91879	11.826	31.6832	13.4891	9.74143	20.2121	18.7021	31.8595	24.9774	15.9038	33.9462	21.9017	32.699	30.7878	14.3091	11.6721	16.2101	7.77089	24.9415	11.9573	23.6575			2.41957	1.72353	0.49157	1.5873	2.70857
																			16.8532	26.761	17.8975	7.64075	9.49541	31.5894	13.0596	12.9168	12.4504	18.7456	45.9465	14.9816	16.3741	38.4044	17.3364	30.2994	21.4492	27.3204	29.6956	17.7115	22.7528	10.4076	12.6232	13.3758			1.71761	4.803	3.54984	0.653465	0.702544
																			17.533	16.142	13.941	9.97354	24.9553	18.6867	11.4016	31.8577	20.7062	18.8152	18.6558	17.7312	29.1446	16.0644	16.7839	36.3036	33.2315	19.7947	12.5418	16.8664	21.7382	9.79209	9.18307	11.9281			2.90105	1.12714	1.55959	2.42778	1.65947
																			11.5059	17.8471	14.0267	28.1474	11.7139	33.3803	16.4351	44.749	14.918	12.4595	15.4798	18.1675	31.03	19.5091	28.2491	23.1989	13.8444	34.2171	15.0015	21.2302	7.10677	11.2578	8.65321	26.368			12.4853	1.37195	1.25486	0.390199	0.854044
																			14.4796	11.4335	11.919	9.59238	26.8247	29.4524	14.1862	18.5487	14.1357	46.552	32.3326	19.6333	16.9229	20.5414	12.9998	21.0157	14.0243	15.3964	21.2119	11.3276	22.8581	27.0236	8.72058	11.81			7.59826	1.33084	1.36948	2.29988	1.61708
																			13.7441	22.6287	34.0861	11.5843	33.5558	21.0381	25.0251	9.58141	12.6869	16.0502	18.6135	16.2688	35.8497	23.5028	28.7057	17.1058	12.4414	17.2451	15.2574	23.2078	11.1534	10.9173	25.7821	13.882			1.59593	0.625311	25.708	20.4931	2.0555
																			18.2301	12.4854	19.9304	8.9287	10.0392	20.5019	13.5893	21.1939	12.4977	23.9102	28.9444	15.6166	21.4584	21.9644	13.4497	17.0066	16.9823	19.9329	13.7145	26.1146	32.4407	14.3355	11.2255	13.0146			1.62734	5.37951	1.08731	4.09495	2.40615
																			17.0135	21.0951	22.9727	10.7683	50.654	25.9057	15.2296	9.70004	13.9387	20.1918	16.0952	23.6329	10.963	43.0241	27.8064	33.048	12.8967	21.5907	11.2616	19.1863	16.0677	32.068	12.2743	35.5749			2.59677	2.98146	0.787029	0.429038	0.58872
																			16.5928	24.3887	14.9123	7.86992	10.9855	27.6651	12.1984	12.325	16.2352	16.4709	26.538	18.8274	30.8026	28.7469	12.7835	21.2079	22.8566	17.3393	18.5856	11.8069	13.0334	40.2022	10.405	13.3352			4.72813	4.45838	0.724954	3.71057	0.72197
																			15.8448	20.7876	12.919	13.7759	12.4502	34.33	26.0539	23.1175	13.0531	21.4189	42.3419	18.0285	43.4557	30.7426	15.7711	36.3755	15.6943	19.2209	17.2039	14.2095	24.5192	17.6736	11.5396	11.4816			0.437807	9.51391	7.50205	0.086577	2.94898
																			21.0844	15.7921	21.8978	11.5263	17.6669	18.4597	26.5075	11.9643	29.1868	26.0162	13.508	28.0969	23.163	17.3332	56.9929	36.6646	17.2378	14.8587	18.6882	22.3733	15.463	9.36016	8.87125	13.7533			0.499902	0.255716	1.18568	1.11148	2.06825
																			18.2084	24.2705	13.7583	12.2655	14.8306	19.7524	8.04958	13.4606	13.9649	13.8152	17.9638	17.7562	14.6504	15.4598	31.9777	19.4875	15.1376	47.5679	17.6141	35.3482	16.8868	9.62191	9.17404	15.0099			1.97897	0.058931	1.94855	0.747554	1.82949
																			11.1924	20.5333	11.6903	9.18824	12.7208	9.60841	18.2204	10.6883	14.5935	15.6351	10.8602	20.6187	21.9792	16.6552	13.7846	25.8894	17.9501	15.0033	21.6916	18.235	14.3589	11.2904	38.4897	15.6381			4.5374	3.76492	0.117793	0.802694	10.6044
																			16.3599	19.129	12.7844	15.2829	11.1487	23.7202	21.3222	23.498	17.3405	35.6138	31.9499	11.9747	42.3673	19.9768	16.581	31.8833	11.6077	17.9601	10.0291	17.8061	20.7302	12.8234	9.09734	10.073			2.64408	0.211963	0.728067	0.592455	6.54447
																			16.3541	19.9271	11.5896	16.5675	48.662	19.3168	11.0012	10.5367	22.7486	29.8375	43.0244	11.9016	43.3155	16.3729	21.7069	23.5642	20.2329	17.6075	13.6761	34.3777	20.2075	13.2243	11.509	12.4105			5.97349	0.246956	3.98878	0.89134	1.49209
[truncated: 19 more columns]

## Sheet: Fig.2 Supplement 1 Values
	2.1A
	CONTROL GROUP: Baseline, n = 18 cells										CONTROL GROUP: Synaptic Blockers, n = 18 cells										CONTROL GROUP n = 18 cells
	FIRING FREQUENCY (Hz)										FIRING FREQUENCY (Hz)										Baseline		Synaptic Blockers
	0pA	50pA	100pA	150pA	200pA	250pA	300pA	350pA	400pA		0pA	50pA	100pA	150pA	200pA	250pA	300pA	350pA	400pA		FI SLOPE	INPUT R (MW)	FI SLOPE	INPUT R (MW)
	0	0	0	2.85714	7.14286	10	14.2857	17.1429	20		0	0	0	2.85714	7.14286	10	12.8571	15.7143	18.5714		0.0527273	119.386	0.0490909	145.752
	0	0	0	0	0	1.42857	4.28571	5.71429	7.14286		0	0	0	0	1.42857	2.85714	8.57143	10	10		0.0418367	109.181	0.0319048	109.119
	0	0	1.42857	7.14286	12.8571	15.7143	18.5714	20	21.4286		0	0	4.28571	8.57143	12.8571	15.7143	18.5714	21.4286	22.8571		0.0524675	125.406	0.0503896	156.471
	0	0	0	0	1.42857	5.71429	10	14.2857	17.1429		0	0	0	0	2.85714	7.14286	11.4286	15.7143	18.5714		0.0618182	125.795	0.0625108	142.096
	0	0	0	0	0	0	1.42857	4.28571	7.14286		0	0	0	0	0	4.28571	8.57143	11.4286	12.8571		0.055102	60.8324	0.0447619	88.6451
	0	0	0	0	0	5.71429	10	12.8571	15.7143		0	0	0	2.85714	8.57143	11.4286	15.7143	18.5714	20		0.0542857	104.351	0.0561039	132.764
	0	0	0	0	2.85714	7.14286	11.4286	14.2857	17.1429		0	0	0	2.85714	7.14286	11.4286	15.7143	17.1429	20		0.0542857	95.5507	0.0569697	132.408
	0	0	0	5.71429	10	14.2857	17.1429	18.5714	20		0	0	0	4.28571	8.57143	12.8571	15.7143	18.5714	21.4286		0.0506493	181.612	0.0555844	201.251
	0	0	0	0	4.28571	7.14286	10	14.2857	15.7143		0	0	0	1.42857	7.14286	10	14.2857	15.7143	18.5714		0.0533333	124.64	0.052987	142.766
	0	0	0	0	4.28571	7.14286	11.4286	14.2857	17.1429		0	0	0	1.42857	4.28571	8.57143	11.4286	14.2857	15.7143		0.052987	127.931	0.0514286	139.723
	0	0	0	0	2.85714	7.14286	8.57143	11.4286	15.7143		0	0	0	1.42857	2.85714	4.28571	5.71429	8.57143	7.14286		0.0521212	118.731	0.0326531	173.472
	0	0	0	0	0	2.85714	5.71429	8.57143	10		0	0	0	0	0	0	2.85714	5.71429	7.14286		0.0442177	81.1794	0.0357143	65.5113
	0	0	0	0	1.42857	5.71429	7.14286	10	11.4286		0	0	0	0	0	0	1.42857	4.28571	5.71429		0.0451948	103.68	0.035034	86.4642
	0	0	0	0	0	0	4.28571	7.14286	8.57143		0	0	0	0	0	2.85714	5.71429	7.14286	10		0.042517	71.1676	0.0385714	81.6859
	0	0	0	2.85714	7.14286	10	11.4286	14.2857	17.1429		0	0	0	0	1.42857	4.28571	7.14286	8.57143	11.4286		0.0490909	135.275	0.0445022	114.396
	0	0	4.28571	11.4286	17.1429	21.4286	24.2857	27.1429	28.5714		0	0	4.28571	10	15.7143	20	22.8571	24.2857	25.7143		0.085034	237.307	0.0768707	235.359
	0	0	0	5.71429	12.8571	18.5714	22.8571	27.1429	28.5714		0	0	0	5.71429	12.8571	17.1429	21.4286	24.2857	28.5714		0.0753247	194.494	0.071342	208.12
	0	0	1.42857	7.14286	11.4286	17.1429	20	22.8571	25.7143		0	0	1.42857	7.14286	11.4286	15.7143	20	22.8571	25.7143		0.0633367	191.878	0.0631369	199.045
	2.1B
	CTA GROUP: Baseline, n = 19 cells										CTA GROUP: Synaptic Blockers, n = 19 cells										CTA GROUP n = 19 cells
	FIRING FREQUENCY (Hz)										FIRING FREQUENCY (Hz)										Baseline		Synaptic Blockers
	0pA	50pA	100pA	150pA	200pA	250pA	300pA	350pA	400pA		0pA	50pA	100pA	150pA	200pA	250pA	300pA	350pA	400pA		FI SLOPE	INPUT R (MW)	FI SLOPE	INPUT R (MW)
	0	0	8.57143	18.5714	27.1429	32.8571	37.1429	40	42.8571		0	0	8.57143	17.1429	22.8571	27.1429	30	32.8571	32.8571		0.123469	214.7	0.108163	255.624
	0	0	0	4.28571	7.14286	10	11.4286	14.2857	15.7143		0	0	0	4.28571	7.14286	10	12.8571	15.7143	18.5714		0.0441558	141.179	0.0493506	136.109
	0	0	0	4.28571	7.14286	11.4286	12.8571	15.7143	18.5714		0	0	0	4.28571	7.14286	10	12.8571	14.2857	18.5714		0.0475325	165.013	0.0475325	174.414
	0	0	0	1.42857	5.71429	8.57143	11.4286	12.8571	15.7143		0	0	1.42857	4.28571	7.14286	10	12.8571	14.2857	17.1429		0.0519481	129.301	0.0466533	153.339
	0	0	1.42857	7.14286	11.4286	17.1429	20	22.8571	25.7143		0	0	1.42857	5.71429	8.57143	12.8571	15.7143	18.5714	21.4286		0.0633367	140.636	0.0549451	153.611
	0	0	1.42857	7.14286	11.4286	15.7143	20	22.8571	25.7143		0	0	0	4.28571	8.57143	12.8571	17.1429	20	24.2857		0.0663337	183.875	0.0683117	145.369
	0	0	0	4.28571	10	12.8571	15.7143	18.5714	21.4286		0	0	0	2.85714	7.14286	11.4286	14.2857	17.1429	20		0.0527273	125.502	0.0553247	134.902
	0	0	0	1.42857	4.28571	8.57143	10	12.8571	15.7143		0	0	0	1.42857	5.71429	8.57143	10	12.8571	15.7143		0.0485714	151.703	0.0472727	186.743
	0	0	0	0	0	2.85714	7.14286	10	11.4286		0	0	0	0	0	1.42857	5.71429	7.14286	8.57143		0.0480952	84.0549	0.04	92.1588
	0	0	0	2.85714	10	11.4286	15.7143	18.5714	18.5714		0	0	0	2.85714	5.71429	8.57143	10	12.8571	12.8571		0.0759184	214.241	0.0506122	213.978
	0	0	0	0	1.42857	8.57143	17.1429	22.8571	30		0	0	0	1.42857	8.57143	15.7143	22.8571	27.1429	37.1429		0.108398	93.0986	0.125714	122.726
	0	0	0	0	0	7.14286	11.4286	17.1429	21.4286		0	0	0	0	7.14286	11.4286	17.1429	20	24.2857		0.0809524	75.8733	0.0787879	90.4652
	0	0	0	0	1.42857	5.71429	8.57143	11.4286	12.8571		0	0	0	0	2.85714	5.71429	8.57143	10	12.8571		0.0455411	117.7	0.0436364	134.125
	0	0	0	0	1.42857	5.71429	10	12.8571	15.7143		0	0	0	0	0	2.85714	7.14286	10	12.8571		0.054026	103.16	0.0552381	94.2612
	0	0	0	0	4.28571	7.14286	10	11.4286	12.8571		0	0	0	1.42857	4.28571	7.14286	8.57143	10	11.4286		0.04	112.432	0.0349784	133.348
	0	0	0	0	0	4.28571	7.14286	10	11.4286		0	0	0	0	0	0	2.85714	5.71429	7.14286		0.0447619	80.3346	0.0404762	82.7169
	0	0	0	1.42857	5.71429	8.57143	11.4286	14.2857	17.1429		0	0	0	0	1.42857	5.71429	8.57143	11.4286	14.2857		0.0537662	137.248	0.0542857	122.899
	0	0	0	0	2.85714	7.14286	10	11.4286	14.2857		0	0	0	0	2.85714	5.71429	8.57143	10	12.8571		0.0477922	90.6234	0.0424242	99.7678
	0	0	0	0	5.71429	10	14.2857	18.5714	24.2857		0	0	0	1.42857	7.14286	12.8571	18.5714	22.8571	27.1429		0.0803463	115.449	0.0818182	119.46

## Sheet: Fig. 2 statistics
	PANEL	SAMPLE SIZE	STATISTICAL TEST	D Mean [CI, lower limit, upper limit]	p-VALUE
	2C, FI Slope: control vs. CTA	control, N = 15 rats; CTA, N = 14 rats	Permutation t-test	0.016 [95%, -0.006, 0.036]	0.1684
	2C, Input Resistance: control vs. CTA	control, N = 15 rats; CTA, N = 14 rats	Permutation t-test	12.50MW [95%, -13.62, 40.97]	0.3826
	2D, Total Excitatory Charge: control vs. CTA	control, N = 8 rats; CTA, N = 7 rats	Permutation t-test	-2.76pC [95%, -4.11, -1.42]	0.004
	2E, Mean sEPSC amplitude: control vs. CTA	control, N = 8 rats; CTA, N = 7 rats	Permutation t-test	-2.28pA [95%, -6.58, 1.42]	0.3166
	2E, Mean sEPSC frequency: control vs. CTA	control, N = 8 rats; CTA, N = 7 rats	Permutation t-test	1.41Hz [95%, -6.33, 8.30]	0.7492
	PANEL	SAMPLE SIZE	STATISTICAL TEST	TEST STATISTICS	p-VALUE
	2E, sEPSC amplitude cumulative probability: control vs. CTA	Control, n = 24 cells; CTA, n = 24 cells; 100 events/cell	2-sample KS test	d =0.1013	0
	2E, sEPSC frequency cumulative probability: control vs. CTA	Control, n = 24 cells; CTA, n = 24 cells; 100 events/cell	2-sample KS test	d = 0.0354	0.0964
	PANEL	SAMPLE SIZE	STATISTICAL TEST	D Mean [CI, lower limit, upper limit]	p-VALUE
	2.1A, FI Slope: control vs. synaptic blockers	n = 18 cells	Paired permutation t-test	-0.004 [95%, -0.007, -0.002]	0.0056
	2.1A, Input Resistance: control vs. synaptic blockers	n = 18 cells	Paired permutation t-test	13.70MW [95%, 5.03, 22.65]	0.0086
	2.1B, FI Slope: CTA vs. synaptic blockers	n = 19 cells	Paired permutation t-test	-0.003 [95%, -0.007, 0.001]	0.1616
	2.1B, Input Resistance: CTA vs. synaptic blockers	n = 19 cells	Paired permutation t-test	8.94MW [95%, -0.13, 16.16]	0.0494
	2.1C, FI Slope: Control vs. CTA	Control, n = 18 cells; CTA, n = 19 cells	Permutation t-test	0.009 [95%, -0.002, 0.023]	0.191
	2.1C, Input Resistance: Control vs. CTA	Control, n = 18 cells; CTA, n = 19 cells	Permutation t-test	-2.68MW [95%, -31.06, 25.46]	0.8582
