# Supplementary material for: LTD at amygdalocortical synapses as a novel mechanism for hedonic learning
Source: eLife. 2020 Nov 10;9:e55175. doi: 10.7554/eLife.55175 (PMC7655100; doi:10.7554/eLife.55175)
Supplement: Figure 3—source data 1. — Excel worksheet tabs are labeled to indicate the specific figure. Each data table is labeled to indicate the specific figure panel. The statistics worksheet indicates specific tests and values applied to each data set in the figure and supplements. [file elife-55175-fig3-data1.xlsx]

## Sheet: Fig. 3 Values
	3C			3D			3E
	BLA-EPSC AMPLITUDE (pA)			BLA-EPSP AMPLITUDE (mV)			CONTROL GROUP, n = 30 cells		CTA GROUP, n = 34 cells
	CONTROL	CTA GROUP		CONTROL	CTA GROUP		BLA-EPSC	BLA-EPSP	BLA-EPSC	BLA-EPSP
	N = 13 rats	N = 12 rats		N = 13 rats	N = 12 rats		AMPLITUDE (pA)	AMPLITUDE (mV)	AMPLITUDE (pA)	AMPLITUDE (mV)
	49.913	31.7834		3.85913	3.64439		261.169	12.2408	13.17	0.604432
	153.861	115.713		14.2203	2.22917		272.999	6.5915	40.3329	1.77057
	279.699	63.5929		9.19486	7.22413		284.996	9.53202	37.8847	1.95414
	247.256	26.7514		7.92633	1.1875		219.939	5.77182	44.9109	3.28292
	56.4347	37.8847		2.29795	1.95414		164.831	4.83652	58.1601	3.88155
	113.281	90.0887		5.29892	3.29326		279.602	8.58537	113.255	3.05733
	285.406	147.314		0.851741	6.31561		56.4347	2.29795	166.684	4.55543
	59.2567	65.2126		10.5473	4.0958		28.4275	2.05422	106.294	3.10545
	137.01	78.6711		5.73856	0.417907		126.917	6.54466	105.566	3.44846
	191.354	101.228		1.09205	4.22331		190.4	7.05901	35.7503	1.72169
	101.205	61.9103		6.41113	3.49247		49.913	3.85913	184.001	9.31069
	62.3743	60.1715		2.12364	6.35994		153.861	14.2203	177.282	7.4128
	23.3763			4.08528			135.519	6.34891	50.7754	3.79882
							85.1433	4.48779	177.199	4.74013
							23.3763	0.851741	55.6739	4.40095
							367.161	11.2335	74.7514	3.79065
							475.631	17.8686	236.081	6.67605
							13.4263	2.53991	115.713	3.64439
							76.4618	4.83425	63.5929	7.22413
							61.4038	9.90269	61.9103	0.417907
							279.699	9.19486	25.3689	1.14756
							39.9046	2.47873	122.992	6.4346
							14.3029	1.06277	185.272	0.758733
							29.0653	1.12132	71.2779	4.22331
							104.209	4.24095	20.2419	1.39344
							103.348	2.37855	48.845	2.37336
							366.504	12.6139	31.7834	2.22917
							101.205	2.12364	145.897	5.90019
							43.4582	2.95124	18.2506	1.39634
							81.2903	5.21932	71.8649	4.41222
									69.3359	6.02633
									46.7646	2.94539
									93.74	8.30083
									63.6022	4.41904

## Sheet: Fig.3 Supplement 1 Values
	3.1A
	BLA CONNECTIVITY (%)			PAIRED-PULSE RATIO (PPR)			COEFFICIENT OF VARIATION (CV)			DECAY TAU
	CONTROL N = 16 rats	CTA GROUP N = 13 rats		CONTROL N = 13 rats	CTA GROUP N = 12 rats		CONTROL N = 13 rats	CTA GROUP N = 12 rats		CONTROL N = 13 rats	CTA GROUP N = 12 rats
	100	100		1.45444	1.75356		0.133593	0.5093		0.00551662	0.00546954
	100	50		1.2106	1.04578		0.166115	0.186547		0.0127545	0.0145486
	71.4286	60		2.01242	2.01124		0.279737	0.458684		0.00814507	0.00990149
	100	50		1.38634	1.70502		0.369641	0.293514		0.00851012	0.00566005
	50	40		1.77058	1.08808		0.358712	0.242892		0.00476271	0.00277499
	100	33.3333		1.07739	1.80831		0.434141	0.643241		0.00987301	0.0068145
	50	100		1.96333	1.13012		0.344698	0.177535		0.00932015	0.00777397
	100	100		1.30799	1.4024		0.474562	0.396256		0.00595588	0.00666866
	20	60		1.64838	1.39024		0.257998	0.345316		0.00651438	0.0061515
	20	33.3333		1.32453	0.956603		0.260056	0.138803		0.0109772	0.00791883
	100	80		1.11579	1.05521		0.129041	0.196006		0.00813693	0.00554248
	62.5	100		1.27117	1.02		0.20499	0.311546		0.00790188	0.00710103
	75	100		1.24449			0.22998			0.00210838
	60
	50
	100

## Sheet: Fig.3 Statistics
	PANEL	SAMPLE SIZE	STATISTICAL TEST	D Mean [CI, lower limit, upper limit]	p-VALUE
	3C, EPSC amplitude: control vs. CTA	control, N = 13 rats; CTA, N = 12 rats	Permutation t-test	-61.99pA [95%, -117.58, -15.35]	0.033
	3D, EPSP amplitude: control vs. CTA	control, N = 13 rats; CTA, N = 12 rats	Permutation t-test	-1.96mV [95%, -4.42, 0.30]	0.1432
	3.1A, BLA connectivity: control vs. CTA	control, N = 16 rats; CTA, N = 13 rats	Permutation t-test	-2.69 [95%, -21.73, 17.84]	0.7978
	3.1A, Paired-pulse ratio: control vs. CTA	control, N = 13 rats; CTA, N = 12 rats	Permutation t-test	-0.08 [95%, -0.33, 0.18]	0.5508
	3.1A, Coefficient of variation: control vs. CTA	control, N = 13 rats; CTA, N = 12 rats	Permutation t-test	0.05 [95%, -0.05, 0.15]	0.3806
	3.1A, Decay tau: control vs. CTA	control, N = 13 rats; CTA, N = 12 rats	Permutation t-test	-5.31e-4 [95%, -2.43e-3, 1.90e-3]	0.6486
	PANEL	SAMPLE SIZE	STATISTICAL TEST	TEST STATISTICS	p-VALUE
	3E, Input-output function: EPSC vs. EPSP	control, n = 30 cells	Spearman rank order correlation	rs = 0.8363, t = 8.07, df = 28	1e-06
	3E, Input-output function: EPSC vs. EPSP	CTA, n = 34 cells	Spearman rank order correlation	rs = 0.6483, t = 4.82, df = 32	3.4e-05
