# Supplementary material for: LTD at amygdalocortical synapses as a novel mechanism for hedonic learning
Source: eLife. 2020 Nov 10;9:e55175. doi: 10.7554/eLife.55175 (PMC7655100; doi:10.7554/eLife.55175)
Supplement: Figure 4—source data 1. — Excel worksheet tabs are labeled to indicate the specific figure. Each data table is labeled to indicate the specific figure panel. The statistics worksheet indicates specific tests and values applied to each data set in the figure and supplements. [file elife-55175-fig4-data1.xlsx]

## Sheet: Fig.4 Values
	4B			4C					4D															4D																4E					4F
	PLASTICITY INDUCTION			CONTROL					CONTROL - PLASTICITY TIMECOURSE (% change)															CONTROL - SERIES RESISTANCE (% change)																CTA					CTA - PLASTICITY TIMECOURSE (% change)
	CONTROL	CTA		n = 13 cells					n = 13 cells															n = 13 cells																n = 11 cells					n = 11 cells
	n = 23 cells	n = 23 cells		PAIRED-PULSE RATIO		COEFFICIENT OF VARIATION			time (min)	Cell 1	Cell 2	Cell 3	Cell 4	Cell 5	Cell 6	Cell 7	Cell 8	Cell 9	Cell 10	Cell 11	Cell 12	Cell 13		time (min)	Cell 1	Cell 2	Cell 3	Cell 4	Cell 5	Cell 6	Cell 7	Cell 8	Cell 9	Cell 10	Cell 11	Cell 12	Cell 13			PAIRED-PULSE RATIO		COEFFICIENT OF VARIATION			time (min)	Cell 1	Cell 2	Cell 3	Cell 4
	LTD = 13	LTD = 5		pre-induction	post-induction	pre-induction	post-induction		-10	-11.6269	9.79426	2.46985	-2.93079	56.8465	20.995	-19.4367	-0.43512	4.83019	-19.6942	5.27415	64.7571	38.4345		-10	-9.0804	-4.68547	9.47455	14.3548	7.57706	0.08815	-5.07863	-7.65515	4.83245	-10.3415	-1.92704	2.20643	15.4628			pre-induction	post-induction	pre-induction	post-induction		-10	-15.7162	15.9248	-9.08205	-39.3285
	LTP = 5	LTP = 11		1.45444	1.1054	0.133593	0.131201		-9.5	3.29162	-13.1723	-28.3512	-2.13126	-20.4027	-29.5238	15.7011	13.2258	14.6935	12.4913	-24.4533	-6.02431	-37.8237		-9.5	56.677	-2.50827	-6.86323	5.13506	7.64005	2.37106	-2.5691	-4.54879	5.0639	-6.5455	-0.664356	3.49021	7.4704			1.13012	1.12275	0.177535	0.171434		-9.5	5.08111	-17.3401	13.5266	-38.2189
	no change = 5	no change = 7		1.02027	0.483182	0.13225	0.234011		-9	-25.0191	-11.5327	-19.6758	17.1912	12.7397	45.9208	0.745388	15.3519	8.26259	5.47493	-0.111334	96.2028	-9.84553		-9	2.56691	-4.55342	10.1174	3.7842	-0.477562	-1.32693	-2.03855	-8.64286	7.44044	-0.105935	4.54108	-2.09997	2.85947			2.67997	2.28195	0.367131	0.305012		-9	-11.0662	70.7813	7.90466	-10.5533
				1.30401	1.36377	0.201438	0.236768		-8.5	0.466292	-2.72738	0.519111	-17.5761	-45.8513	4.37688	-2.84296	3.71888	-19.3655	20.6096	-39.705	-47.3886	41.1554		-8.5	0.649243	-2.83728	13.3522	0.940835	-4.4359	-2.96371	-2.11439	-4.65927	7.67666	3.16122	-0.562401	5.64201	1.93636			1.0669	0.641049	0.215777	0.172022		-8.5	7.92573	-35.4809	-7.12382	-40.1185
				0.909818	1.02724	0.155648	0.190388		-8	-21.3623	-3.69462	-17.4799	-32.6821	-13.5878	-26.2795	29.3417	-30.2081	-19.7158	26.0536	-38.2973	-54.1936	-54.8476		-8	0.225364	-7.43869	0.727354	2.98373	-5.44601	-0.462973	-3.57433	-4.13698	7.29266	6.94487	0.672673	-5.15231	1.84558			0.477726	0.29684	0.161472	0.144736		-8	-2.23176	-48.5469	-20.0377	55.2335
				1.62883	0.931111	0.373842	0.566141		-7.5	5.20958	4.43758	38.1758	3.74524	16.9752	-5.30032	-9.40217	27.8466	10.2394	-12.1318	-10.995	-74.3114	-45.6313		-7.5	-6.92599	3.14329	14.6372	1.66719	2.5277	-6.13133	0.743969	-6.48558	-0.130153	6.63806	3.85889	0.116149	-0.762777			1.98957	1.12776	0.613515	0.44185		-7.5	24.1223	-11.7647	-13.083	-28.3822
				1.56757	1.81488	0.218817	0.187682		-7	19.4267	-6.593	-21.5479	-8.46283	-13.9704	-36.5079	0.600437	-23.1649	-14.5159	-17.1117	22.9998	2.8134	-33.8998		-7	-5.70872	2.02875	0.121683	-3.96457	0.420651	-5.38364	-2.23056	0.0609891	0.677119	-5.38168	-2.11258	-0.988224	2.44847			1.06724	0.952144	0.301404	0.259923		-7	31.1976	28.0101	-11.168	46.2273
				1.86744	1.80276	0.180917	0.166374		-6.5	-9.59368	6.69856	-9.53835	-9.12938	-27.7098	12.4547	-22.3554	0.321385	-13.5201	-15.9786	15.7091	132.626	-55.7946		-6.5	-6.26413	-3.74312	-2.62436	-1.11637	2.7877	-1.05138	6.43574	0.0922428	0.333354	5.58151	-0.0563901	14.9035	-0.0897806			1.35337	1.35555	0.372261	0.222696		-6.5	-11.9045	-48.111	-7.84299	-16.3011
				3.7017	1.23386	0.502321	0.114697		-6	1.06703	1.04653	31.9097	12.2359	63.9231	1.39068	0.250299	-37.2529	23.8843	-15.9999	25.8438	7.29723	40.1123		-6	-6.11521	-2.26927	-2.3267	0.367893	2.87602	-0.467753	0.574801	-0.110338	1.42272	-1.81106	1.37755	-5.70913	0.754594			1.44977	1.77977	0.286872	0.26412		-6	-2.67418	-64.6549	3.15965	-51.5944
				1.66656	1.45364	0.155974	0.133906		-5.5	26.3409	6.71371	3.20766	5.02221	-22.1656	-15.7129	14.5051	25.4059	-6.00199	23.6899	174.689	30.195	59.5591		-5.5	-4.78609	-6.43272	6.64322	-4.54335	-0.424411	-1.31206	1.16624	2.10888	-2.69434	-0.318975	1.64238	3.30594	-3.04988			1.50969	1.44792	0.417457	0.178565		-5.5	13.548	59.6728	-1.53187	-2.2771
				1.59419	1.12794	0.231581	0.250123		-5	-5.75954	10.0955	14.1638	6.38824	51.4452	-12.9656	-4.34627	-10.2038	-10.3509	-24.4895	-5.31122	22.5825	88.8259		-5	-3.63204	0.605723	-11.4672	0.509033	5.94066	2.43177	1.15646	2.51058	0.615536	-4.67732	-2.17428	-2.07245	-2.25291			1.40542	1.06645	0.469786	0.109928		-5	-33.4254	42.1682	17.3197	-23.1791
				1.17849	1.4063	0.5077	0.493366		-4.5	15.9408	-1.71006	-33.1758	-0.0571993	-70.247	28.8992	-22.9545	28.1188	-25.5774	9.16149	-30.9975	-32.4441	-42.5981		-4.5	-1.91023	4.54204	-14.7526	-1.11062	-3.1301	0.249507	3.54788	2.92659	-2.30297	1.00188	-0.116554	-5.72555	-4.62466			1.19607	1.36357	0.207151	0.698158		-4.5	13.9867	-42.4626	31.3289	52.9598
				1.5334	1.46558	0.16587	0.19868		-4	-10.3324	9.77743	23.3173	28.6034	16.3202	10.9182	-29.7836	-4.55064	45.4092	-1.73951	-43.0353	-25.6224	-12.4795		-4	3.32049	3.89924	-7.03544	-0.948815	-4.37919	0.702456	0.588446	2.12411	-0.29794	3.94259	-0.686908	0.302206	-1.07086								-4	-14.5726	-15.562	-46.1335	-33.5453
				2.19864	2.4245	0.570045	0.612493		-3.5	4.24089	21.1661	-12.8952	0.649607	30.9306	0.650967	-6.08633	-1.4535	-10.1732	-5.02055	46.3745	15.8395	-38.061		-3.5	-0.303743	4.83991	-5.12911	-2.142	1.74681	4.83826	1.7175	2.45398	-2.37231	7.28676	4.93091	-4.71739	0.388074								-3.5	-13.8477	22.0834	-31.4522	-15.3324
									-3	19.0303	-2.27552	29.8042	-1.21583	-12.5383	-29.6845	24.5065	24.4241	-12.1862	15.3357	7.79952	-61.2132	24.5352		-3	-7.31962	3.06283	-3.60719	-4.32322	-3.38467	-1.21878	4.85391	0.868047	-5.93978	1.19168	-1.24673	-4.1012	-3.22928								-3	-13.381	24.9957	45.9775	-7.17589
									-2.5	1.56939	-19.9203	5.77469	-8.56247	-6.26483	19.742	2.39816	-45.702	5.65411	-10.6533	-35.8755	-26.8019	87.6296		-2.5	-0.630551	-5.07996	-4.22912	-3.40012	-2.06743	5.78619	-7.03812	4.77438	-1.60869	1.47081	-0.854022	-4.21997	-6.68464								-2.5	20.8303	-7.42506	6.34911	43.2538
									-2	-11.5247	5.8529	-12.9507	-4.35904	52.8309	2.62594	3.44148	-2.19043	13.6062	-21.5595	45.826	-44.4383	-52.0538		-2	-3.66469	-3.4863	-2.71487	-1.36006	-0.921046	0.793047	10.8356	3.66418	-4.00539	4.55881	-1.51421	-3.61448	-5.07839								-2	26.0421	-5.55988	6.51025	9.21558
									-1.5	3.19912	-33.8573	7.97413	-25.965	-51.5927	-19.1582	5.04948	-27.2769	-20.5941	18.0203	-45.0378	59.8076	-9.35028		-1.5	-3.12348	5.47445	15.2431	-2.38963	-0.451753	2.98906	-3.66362	7.16393	-4.62011	10.6394	-1.51421	1.1574	-6.75069								-1.5	-24.2013	7.77399	24.8358	75.1755
									-1	-6.79518	22.5271	-0.779923	29.0057	-5.81025	7.87781	11.4012	31.6664	13.9608	-0.146446	-23.9993	-78.4236	-49.9423		-1	1.39532	7.54841	-3.3902	-2.34144	-2.91032	0.210734	-4.55187	5.98079	-8.04427	-27.8616	-2.90007	2.99723	1.77165								-1	-4.5476	8.10781	-19.5485	15.6999
									-0.5	2.23119	-2.6264	-0.921541	10.2305	-11.8708	19.2805	9.26692	12.3584	11.4607	13.6882	-46.6974	18.7404	62.0755		-0.5	-5.36941	7.88986	-6.17656	-2.10258	-3.48826	-0.14169	1.23866	1.51026	-3.33888	4.62601	-0.69374	4.2796	-1.34355								-0.5	4.83463	17.3902	10.0915	8.24118
									20 Hz protocol															20 Hz protocol																					20 Hz protocol
									0	33.5063	-39.641	-42.2607	6.55783	-48.112	-37.9408	7.41702	74.3594	-10.4425	-50.8451	10.4078	33.1962	50.2384		0	21.1537	5.12244	-4.12079	-2.90277	0.190158	-4.67803	-4.80637	3.30097	-10.172	1.75003	0.607421	-4.62726	-15.9756								0	-87.6019	15.4472	-13.3637	419.749
									0.5	101.117	-9.71689	8.06243	17.1607	-24.9018	16.3625	27.4065	142.388	74.1534	35.8381	214.468	193.61	194.241		0.5	-0.338692	0.615891	67.2161	-0.354673	-6.93735	-10.3548	-6.59411	4.59744	-8.9423	0.953639	-2.04948	3.55569	-19.8508								0.5	21.4948	370.557	79.506	340.621
									1	54.3585	-7.86023	-2.75907	-14.9794	-26.8675	-43.964	-5.30263	43.82	71.8767	38.1453	48.5838	157.129	180.238		1	4.96914	8.64057	-0.587678	-4.97527	-2.19366	-7.64193	-6.10971	5.53017	-11.4788	2.66987	-2.12055	4.8335	-17.2267								1	-6.4445	157.689	26.8131	285.41
									1.5	50.3422	-10.523	-6.07222	-15.6362	-30.7686	-21.0248	-9.49881	16.6247	34.3273	35.2589	-40.6822	58.9882	-17.1024		1.5	8.40289	11.8915	-3.0963	-0.0737083	-1.32778	-9.34848	-4.07626	3.78275	-10.3688	15.3468	-2.48157	0.381604	-16.106								1.5	-21.9401	402.336	35.2856	262.875
									2	17.6265	-15.589	-44.5349	-22.71	-37.8768	10.6764	1.38962	5.66846	51.1684	23.1677	7.1019	143.732	34.67		2	1.06118	3.52019	-1.44451	-5.26527	0.330332	-8.20839	-4.48645	6.38678	-8.75123	0.313651	0.205159	1.04528	-12.0506								2	18.7445	205.109	0.188567	179.745
									2.5	12.9139	0.370849	-17.7469	-25.3994	-56.3682	-15.8017	-0.19905	-48.0869	33.702	36.365	-14.3539	-19.5852	29.0674		2.5	5.44602	17.9941	-3.75824	-8.56789	-7.81226	-5.0557	0.405012	9.37157	-8.62285	4.82659	-3.57526	-2.50182	-10.5271								2.5	-19.7009	138.018	41.2608	135.08
									3	7.6161	7.26444	-48.1142	-0.400436	-57.589	-16.4215	-17.5655	1.98533	-8.93192	7.58761	13.7563	13.5661	-49.8728		3	28.3508	-8.63596	1.85363	-7.30842	-6.79779	-4.05442	-2.75744	7.89877	-5.1688	15.4813	-2.09333	-0.782201	-10.8017								3	-12.2976	210.308	14.3725	181.804
									3.5	-2.91607	-16.3311	-67.7238	-23.8951	-15.1481	7.70799	-35.496	-26.9245	9.13481	-20.205	-3.65167	31.1537	69.7791		3.5	9.68872	-1.62207	-1.36585	-4.66105	-1.72527	-5.41961	-1.52987	5.9157	-5.4331	10.8576	0.727465	-5.5516	-7.82937								3.5	13.7271	113.185	31.2376	155.604
									4	-1.56998	-14.6545	-48.8075	-23.5376	-52.0013	-6.8661	-36.3982	-31.2437	-7.37276	-36.1108	-4.5614	62.2719	50.9109		4	5.47235	-9.67714	-1.85661	-6.18377	-8.9296	-2.06124	-0.795104	10.6772	-8.08839	14.653	-6.7573	3.26911	-9.96838								4	32.2706	58.8308	-3.30887	63.8672
									4.5	-11.4283	-23.9033	-22.04	-14.8794	-43.6068	-29.7521	-17.2663	-30.6458	-18.3084	14.8669	240.259	-10.9791	-25.052		4.5	25.0647	-4.7298	2.8424	1.09441	-9.15464	-1.63987	-6.23617	5.01217	-7.94862	1.29952	-5.16152	-0.362353	-5.55194								4.5	-29.7369	297.911	9.53754	48.2536
									5	-25.6275	-28.4337	-55.9146	-4.40134	-59.9581	7.48588	-28.0429	-11.5386	-3.1447	-12.292	-35.2197	-0.268246	-56.3876		5	5.46949	2.11778	-9.29942	-5.35487	-5.13192	-3.709	-0.895009	7.97393	-4.25138	9.49399	-11.7809	-5.92516	-13.2853								5	-22.8868	67.8681	-13.6359	99.7476
									5.5	-45.1355	-27.1522	-31.2924	-11.0611	-31.7526	5.75413	-20.6517	-37.2266	-17.2091	1.74429	75.3036	-14.4109	10.4671		5.5	10.0306	3.06344	-9.14999	-3.52886	-11.1322	-2.2337	0.755134	11.0587	-10.7626	8.48499	-1.32706	-4.43884	-9.59175								5.5	-29.7701	144.661	-12.9961	57.0137
									6	-24.9192	-35.6016	-15.4784	-25.2965	-60.5358	-5.20438	-35.1008	-49.2283	10.9057	-22.5625	-9.62748	-24.9413	-46.2561		6	8.52031	-2.44745	-10.133	-2.01065	-8.45692	-1.48482	-1.18585	3.32578	-5.30232	-2.12998	-0.858108	-6.29067	-7.04631								6	-9.04782	100.716	-1.98021	84.6871
									6.5	-34.7068	-27.8371	2.63332	-14.5919	-62.386	6.46794	-29.1381	-58.3204	-4.42251	-9.20287	-51.1218	-65.2428	-16.1976		6.5	9.1678	9.61862	-12.4668	-2.8817	-9.0299	3.39405	1.25222	6.06189	-6.49713	4.21872	-6.60286	-1.27268	-9.11415								6.5	-24.3447	262.057	28.3357	7.90211
									7	-6.23405	-9.27429	-14.9071	-34.0112	-67.5634	-34.5708	-45.4232	8.96255	-1.62537	-21.3599	-1.82019	94.4756	-49.6914		7	9.07848	4.406	-3.71758	-4.33183	-8.26969	5.84021	0.77428	11.7783	-6.12999	7.13175	-6.35627	4.94558	-9.17681								7	4.80517	16.8076	10.4792	66.5675
									7.5	-28.9984	-24.1074	-51.4274	-30.5735	-46.2874	-6.46506	-32.5412	-29.6917	-17.2467	-24.491	-50.4623	-71.5634	17.7045		7.5	9.17618	10.8149	1.20741	-1.29767	-5.70696	4.88954	-3.32066	11.0059	-7.23424	7.1277	2.37402	0.869609	-9.49476								7.5	-1.60945	-16.718	9.44965	69.7259
									8	-34.6138	-30.4717	-45.0314	-66.2125	-67.1041	-33.0463	-42.2433	-9.0137	5.50829	-7.55691	-34.0407	-72.3259	-13.0617		8	9.08425	12.5927	-5.69521	-2.08172	-5.24556	5.41498	-0.399305	6.71405	-5.32424	-0.314063	-0.430027	-2.27058	-12.2208								8	36.1487	28.3345	19.4721	58.51
									8.5	-31.3858	-24.8172	-32.7304	-35.7843	-57.2317	-11.9304	-55.707	-29.2134	-9.28081	-10.4874	3.46255	-74.0555	-0.312428		8.5	6.0535	17.6355	-2.4892	-2.58862	-9.1894	6.3634	-0.758361	10.0013	-3.42401	7.46831	3.44583	-0.552419	-10.3895								8.5	23.8452	76.8569	-8.3748	54.9916
									9	-11.5456	-13.4138	-20.8529	-43.5242	-54.4688	-29.8505	-40.5297	-23.8762	-37.3852	-17.3964	-14.0854	-30.8353	-56.9193		9	7.07944	7.33919	5.40115	0.0603058	17.8503	5.40247	-3.83636	6.33533	-5.32483	4.25861	3.54823	-7.52139	-11.2323								9	23.3209	110.121	-7.13778	51.3644
									9.5	-24.666	-35.1376	-8.42071	-38.7778	-70.8886	-19.8168	-39.5295	-24.2827	-43.3774	-11.788	-34.3655	-51.5938	-35.3582		9.5	3.0876	20.2337	-5.88558	0.955812	-18.5392	6.25345	-5.85355	6.73132	-1.64514	11.7437	1.54728	-0.89174	-11.7342								9.5	16.4319	48.1665	-27.6342	5.42858
									10	-22.7038	-38.4966	-30.3076	-54.5631	-83.6209	-46.7699	-39.8761	-19.5683	-1.11224	-8.75223	-19.0189	-75.2058	-54.0323		10	-0.141902	23.6992	-14.3626	-1.90216	-3.7303	3.3571	-2.64152	10.4526	-7.35974	6.8416	2.71858	-0.453816	-8.26719								10	16.0952	31.9645	-2.45819	106.49
									10.5	-16.5999	-22.5945	-36.5724	-54.3792	-83.9239	-33.6642	-38.1824	-50.4381	-8.55487	15.3989	-26.025	-40.9616	-51.6173		10.5	20.0184	24.2129	-4.15036	-1.85405	-3.80835	4.62219	-4.62066	6.04347	-4.19985	3.03438	-0.70945	2.32516	-7.00586								10.5	38.7329	45.502	-15.9706	31.0228
									11	-21.7901	-23.9484	-27.4901	-56.42	-42.5841	-43.362	-42.4053	-10.3694	-7.55687	-4.93395	-30.1677	4.13406	-58.6379		11	3.36719	15.216	7.55516	-4.05178	0.661522	5.38193	-5.78049	12.7537	-4.20774	-1.75862	-0.487683	-4.90895	-9.35828								11	28.3734	86.9734	-7.4972	82.6948
									11.5	-34.818	-37.3346	-43.475	-70.8829	-38.8779	-10.0677	-35.581	-15.2359	-9.98789	-8.29536	-37.8781	-15.4511	-57.1661		11.5	10.462	12.2955	-0.258027	-4.37056	7.17072	1.91053	-3.30022	13.8457	-2.39183	6.84644	-0.574044	-2.97789	-9.21196								11.5	36.0134	170.133	-29.6957	60.2971
									12	-27.3114	-22.4388	-40.4088	-41.37	-23.8948	-9.58942	-34.7426	-2.49296	-26.7907	9.25898	-11.391	9.40624	-51.9908		12	10.7967	14.7933	-0.876854	-4.45703	0.864561	4.82589	-3.60829	11.839	6.59058	3.72638	2.14583	-4.0268	-7.27484								12	-23.6064	148.282	34.8192	46.4815
									12.5	-19.2532	-45.0385	-24.7574	-72.1172	-42.7271	-28.8268	-44.6408	-42.1753	-16.6872	-43.2169	-30.8666	43.0281	-39.0076		12.5	4.01935	2.35038	6.47119	-5.89729	11.0971	3.96711	-4.08939	11.0171	-5.86313	2.8182	-1.20686	0.74053	-9.34632								12.5	11.7185	152.609	7.93634	42.505
									13	-13.1145	-30.1953	-40.5281	-53.3402	-60.6354	-23.9927	-46.7636	-13.2499	41.6496	-28.1423	-32.2676	-18.2534	-43.2246		13	4.2482	19.3483	-2.03845	-1.58718	-3.62794	2.14321	-1.09268	10.9987	-5.53169	1.65144	-5.23871	-2.66834	-0.318328								13	7.31934	109.445	-16.8942	31.1968
									13.5	-27.2256	-41.1645	-32.6001	-74.2869	-75.3595	-15.5743	-45.8233	-51.1871	-47.5677	-15.2298	-27.6945	-38.6398	-54.9491		13.5	11.8186	18.1596	-7.64067	-5.48004	-0.0714226	4.05235	1.96932	9.85834	-6.06589	10.2269	0.66144	4.69284	-9.00236								13.5	22.067	320.12	-3.81614	68.447
									14	-40.3217	-56.5857	-36.7612	-82.089	-10.3386	-28.3159	-47.6481	-53.7155	3.99169	-15.9781	-59.79	-78.7271	-29.2132		14	7.13233	17.2725	1.90017	-4.38991	-2.42764	13.3799	-1.07897	9.85206	-7.35804	13.9711	-3.36418	-3.7438	-12.6672								14	62.2548	173.695	-16.1784	62.9145
									14.5	-19.6043	-32.9435	-43.1541	-32.757	-19.5785	-11.2526	-40.9877	-18.6317	-42.3653	-6.92891	-40.6201	-43.1086	-42.4586		14.5	7.20582	20.5585	-6.2426	-5.82748	-6.38398	5.97639	2.26947	14.152	-7.51657	1.08262	-1.58672	0.96975	-13.991								14.5	15.7227	113.173	-6.12698	66.1816
									15	-18.4	-42.9134	-22.0964	-53.7432	-33.2215	-40.3566	-45.5485	-19.5052	-7.06926	-6.95069	-30.1155	-32.2159	-49.4711		15	15.7151	19.335	-17.0611	-0.518422	4.11688	4.36232	-3.17467	6.96061	-5.40828	6.49853	-2.59409	7.90289	-15.0358								15	7.25275	147.151	20.8247	58.5589
									15.5	-27.3201	-59.8345	-44.1105	-32.2885	-55.5603	-31.3563	-66.877	-24.0287	4.01265	-14.5883	0.496811	-44.732	10.8435		15.5	9.60186	7.08404	-13.7722	4.14	-8.04608	9.40912	-4.34276	9.84231	-6.72363	11.0776	9.44816	-5.83655	-15.1572								15.5	48.896	67.3544	-1.66167	69.9107
									16	-21.4114	-35.2566	-7.78824	-46.1473	-82.426	-27.0557	-45.5988	-26.6283	17.1872	-0.220084	24.1606	2.45946	-47.2495		16	10.2595	42.9166	-2.54942	-3.07814	-13.066	6.35612	-0.082633	7.45868	-7.21775	2.12864	7.68865	2.41644	-14.0878								16	5.69957	120.234	-3.89314	66.1965
									16.5	-23.8629	-36.0009	-18.5796	-36.1503	-28.6771	-37.2908	-43.2432	18.7481	-32.0067	30.2717	65.5526	-0.754565	-35.6336		16.5	10.924	8.78754	-10.3318	-5.18501	2.23697	4.13425	3.28166	12.301	-6.44221	10.9219	6.25551	5.31588	-16.3105								16.5	64.8695	108.381	-4.78845	31.6284
									17	-31.3096	-45.9927	-41.9443	-40.0577	-69.9279	-35.2736	-43.8378	-45.0964	2.47874	2.91938	-7.96295	-31.4279	-23.84		17	9.31176	17.8283	-5.05974	-6.33977	4.38919	2.70076	0.010011	6.89469	-3.0919	3.38413	6.22893	1.4021	-11.6677								17	-13.4078	243.947	16.5999	55.1546
									17.5	-33.5766	-33.4542	-35.0754	-72.4055	-74.2564	-26.4349	-54.2318	-17.4035	-5.10698	0.874113	-47.7186	28.535	-46.0884		17.5	20.4437	9.68718	0.791692	-5.79515	4.37249	6.15731	3.57007	7.20042	-6.07522	2.8182	6.58502	-1.19714	-10.7247								17.5	35.7985	118.695	23.4677	57.7734
									18	-34.7009	-49.1709	-52.1993	-42.4851	-35.2173	-47.8727	-52.0385	-15.3355	-33.815	-14.7584	-22.592	-21.072	-40.4051		18	14.1989	10.9255	-5.5728	-3.78586	-8.76345	4.79851	1.97313	3.81328	-4.86057	9.1396	4.36951	-4.99226	-12.4413								18	-13.0466	204.52	29.818	9.14002
									18.5	-24.318	-38.4474	-68.9825	-80.5501	-44.2612	-15.013	-55.9941	-53.0147	-11.5199	-4.91372	85.4772	-76.9836	-13.1868		18.5	10.5251	15.9393	-5.31828	-2.26063	2.28184	6.17815	1.18259	6.5177	-6.2614	4.79944	3.80736	1.91471	-10.1601								18.5	25.5443	115.82	0.54015	43.9102
									19	-25.2126	-52.7622	-49.2625	-85.4027	-61.7688	-29.5334	-53.9267	-30.446	-4.9885	-33.7077	-29.5364	-5.20982	-51.7743		19	20.7684	11.1999	-0.94482	-0.723368	5.2631	7.46816	-0.786726	2.66664	-7.51544	3.09813	2.78879	-5.13338	-8.61238								19	-10.7225	118.678	24.921	37.0772
									19.5	-19.5341	-42.0518	-48.6794	-65.5365	-74.3298	-26.9324	-39.8255	-25.8342	-12.2508	-3.64943	42.7583	-47.3991	22.2031		19.5	7.60963	16.6285	-14.8644	-0.410093	3.38943	3.43189	-0.253729	7.88074	-4.24835	4.06632	6.60627	0.0432848	-4.34767								19.5	8.4037	83.4579	14.5306	87.2244
									20	-21.7372	-44.6157	-43.3932	-54.4386	-60.5395	-51.9522	-45.9277	-23.8563	-7.60244	-21.3464	-4.59785	0.0675796	-13.7156		20	10.5952	14.4395	-8.10406	-2.50208	15.9223	8.75566	-5.242	2.08339	-7.99284	1.74053	2.13788	0.344965	-7.76926								20	-10.4965	121.821	10.1852	19.4748
									20.5	-29.6656	-69.8658	-45.9358	-57.9714	-53.9267	-31.4086	-34.2906	-34.6445	-8.20124	-4.12964	23.1419	-64.15	-31.2625		20.5	17.3074	13.2517	-6.56884	-6.55945	9.54084	8.06862	-0.805413	7.32914	-5.90118	3.71499	-0.282836	-1.47846	-11.2913								20.5	-12.4443	231.153	6.44722	49.4142
									21	-26.9897	-31.4848	-38.2478	-70.9577	-61.1002	-31.8053	-31.2708	14.821	-8.49745	-16.2732	60.2943	-33.8591	-62.2504		21	16.6074	12.5991	-1.60901	2.89963	8.24802	2.10212	-1.4563	16.9303	-9.09765	2.52567	2.78879	-1.54875	-7.44885								21	-7.13898	45.4963	25.9536	110.492
									21.5	-20.6837	-51.6254	-29.0899	-66.4546	-62.6042	-27.9359	-21.4702	-23.3957	-16.3663	30.8536	-42.4367	9.4052	-35.5537		21.5	14.9349	12.4545	-6.52116	1.3951	9.04844	5.12361	-0.987526	16.8795	-6.33624	2.86674	2.23047	0.643865	-8.06374								21.5	1.25401	138.443	13.098	116.213
									22	-26.3067	-55.0648	-31.2543	-62.7575	-58.095	-31.5664	-33.5871	-19.3295	-3.37711	-3.94295	18.9599	-56.5949	-47.5833		22	9.3811	12.3818	-9.26492	3.40692	-0.52914	7.01412	-1.67403	11.05	-5.33076	1.78952	4.10607	-4.70165	0.553387								22	26.4351	59.4765	6.51025	84.9046
									22.5	-29.5184	-63.7553	-44.402	-58.0003	-70.6628	-42.4966	-27.1236	-27.2152	-18.1838	-18.8697	-54.1037	8.85861	-52.5374		22.5	3.94328	16.5837	-4.96033	7.54383	9.6393	3.02916	-2.84132	8.24178	-7.15855	10.4418	-1.76353	-0.114886	-3.99245								22.5	-6.22336	67.4297	31.7656	13.3438
									23	-4.07922	-36.6429	-63.1714	-71.0814	-67.4096	-31.7084	-9.14352	-43.7689	-36.5148	8.1819	-4.13843	-55.3645	-38.7566		23	-3.45868	18.8934	-2.97714	20.5563	11.2875	5.40783	-6.12794	11.4991	-7.00393	15.4032	9.10816	-4.92244	-1.89545								23	21.5824	36.676	-9.44862	11.3041
									23.5	-27.9993	-36.6728	-30.3828	-57.3146	-41.4204	-51.0714	-13.714	8.05126	-13.6542	-8.78801	-46.1369	-49.1218	-49.0421		23.5	-4.84724	15.4718	-3.82412	9.3622	4.3066	-4.66633	-3.40541	14.8863	-6.82643	10.6204	6.50874	-3.91792	-3.71197								23.5	7.491	226.945	7.0659	21.3539
									24	-30.3821	-45.6591	-31.764	-69.0493	-79.1864	-43.4344	-23.6686	-55.7745	-15.7318	6.09981	-3.45655	-38.2088	28.6525		24	-8.0769	3.15895	-5.98479	8.78312	6.5591	12.9033	-1.76914	12.0123	-5.93159	10.196	10.4007	-1.72211	-2.38536								24	34.7465	25.1336	-13.3447	15.6484
									24.5	-0.862686	-55.1199	-25.4629	-59.3318	-43.8441	-22.6327	-19.0137	-53.0774	2.4122	-46.0623	-48.1577	-45.3779	-45.717		24.5	-9.6466	14.22	-2.98173	8.93987	13.0584	-6.26364	-6.82454	6.63485	-3.45112	3.59209	4.03629	-2.295	-8.89115								24.5	19.0003	45.461	14.7673	120.591
									25	-19.9217	-42.3926	-38.8143	-66.3682	-68.0126	-27.6246	-24.453	-24.0943	19.4748	-0.894234	23.376	-33.2352	-55.2555		25	-8.33244	13.7448	-6.41113	12.0071	6.01897	0.306105	-4.02586	8.52516	-8.27558	5.53509	2.90016	-4.47697	-8.09537								25	22.1015	83.5281	-11.0754	27.0254
									25.5	5.14698	-46.1282	-69.2311	-64.3082	-47.9726	-47.8152	-29.8342	-36.7939	22.2182	-10.071	-42.2312	-54.3016	-47.9295		25.5	-13.0357	20.3807	-5.47272	21.7574	4.09363	-5.58189	-0.550414	6.34772	-7.72298	5.96782	3.14131	-10.4397	-5.04559								25.5	37.2139	82.8137	35.8487	76.6445
									26	-26.008	-53.0924	-33.2317	-67.3582	-57.4713	-22.5886	-20.4149	-50.55	-33.4199	-23.7225	-22.394	-76.0878	-30.9387		26	-10.611	16.7008	-6.55267	2.02512	0.107931	-3.04843	-1.94056	7.91501	-7.38979	6.64529	2.12921	1.17659	-6.91135								26	18.4519	108.758	12.9198	10.6061
									26.5	-22.678	-40.8506	-33.1312	-69.3876	-47.0361	-36.1409	-11.7162	-39.3039	-46.6909	-23.3559	-50.935	-55.7547	-26.4189		26.5	-13.9358	14.4778	-8.22164	5.19617	1.79839	-0.128058	-3.39869	2.38596	-6.41791	0.592958	2.37256	-3.10398	-4.34291								26.5	13.6099	106.423	-3.82466	61.402
									27	-17.9174	-37.7911	-58.3214	-62.2391	-45.1264	-11.5692	-23.7491	-44.5467	8.85592	-12.1002	-33.5668	-42.3321	-36.7127		27	-10.6277	15.2969	-7.09018	3.67603	7.60367	1.63403	-0.923682	10.06	-10.7131	0.730329	4.77174	-9.46105	-6.81394								27	80.1533	104.994	3.88871	0.991984
									27.5	-38.2913	-29.5625	-45.0161	-63.3528	-57.3147	0.24801	-22.4156	-46.6497	7.68201	-11.5059	-39.9668	-64.4266	-4.11664		27.5	-16.1363	6.46981	-10.432	5.34275	3.25284	0.926374	-2.45299	6.14237	-6.65401	5.02715	8.78093	-4.36392	-4.24672								27.5	45.8846	159.67	-1.78636	15.1497
									28	-29.6497	-40.8254	-47.8988	-48.4657	-39.8507	-27.8131	-35.1149	-36.7681	-22.1539	-19.9566	-11.2344	-40.4987	-59.2174		28	-22.5268	10.3849	-13.2633	2.99433	5.40762	-3.33328	-9.99601	10.4737	-11.4565	5.96861	2.49977	-12.6145	-2.32687								28	52.6038	134.497	0.627705	23.5622
									28.5	-32.116	-24.2732	-28.2559	-75.8816	-39.3058	12.4187	-38.1921	-26.6098	-12.4899	-6.95381	-53.4222	-19.7367	-54.7656		28.5	-14.524	4.08222	-17.5936	10.9666	1.61293	-0.407975	-13.5866	14.7604	-7.63342	2.61556	1.67244	-5.85771	-5.92335								28.5	40.6618	190.94	-18.258	-18.0278
									29	-23.6061	-44.2989	-25.8362	-82.0211	-22.2343	-17.5689	-25.3761	-49.9358	-13.7594	5.64035	-53.0386	5.75327	-8.41983		29	-21.6204	12.1427	1.33739	5.86657	-3.13586	5.60743	-11.6226	10.0155	-9.27912	18.4851	2.39362	-4.61382	-8.25406								29	-16.3518	110.854	30.2189	23.3332
									29.5	-19.8008	-48.6235	-16.4728	-69.7229	-54.0285	-33.893	-38.8579	-53.4071	-38.4128	-14.1034	-51.0572	-53.9522	-51.561		29.5	-0.313191	2.33763	2.91039	8.20602	7.30553	4.42804	-9.23812	5.79133	-4.50153	11.6336	3.05001	-6.66969	-3.24924								29.5	-5.00103	152.082	-19.8053	6.93463
									30	-34.668	-29.0997	-17.222	-71.2404	-75.0941	-34.0676	-14.4549	-22.5337	3.34549	-18.4745	-38.777	0.851753	-50.3295		30	-15.8768	11.8938	-2.13753	9.30247	2.04034	3.40265	-10.7152	6.86827	-8.31781	15.9959	-0.803606	-8.62872	-2.14928								30	7.39589	173.55	15.8681	47.7657
									30.5	-4.80031	-36.0467	-45.2587	-71.0722	-51.3994	-46.1606	-25.1162	-17.3784	-28.1898	-52.4454	-33.8621	-51.0472	-45.9741		30.5	-16.0446	9.22175	0.0933483	10.5419	0.660745	-0.528255	-10.3838	12.9314	-5.3355	12.4356	-2.76206	-6.6209	-3.73857								30.5	63.2763	95.6225	-4.57211	-16.3057
									31	-11.7557	-41.9807	-22.1733	-70.6477	-72.1446	-46.8121	-20.5795	-38.5613	0.516459	9.84187	-5.47486	-60.6673	-53.7673		31	-17.2682	8.04786	-6.78875	10.4429	1.42894	1.53446	-12.0387	15.107	-6.60331	9.72814	0.730979	-8.44663	2.61298								31	24.853	225.464	3.70201	25.0556
									31.5	-16.0847	-44.5395	-64.6426	-70.5101	-15.8161	-15.8986	-22.9387	-3.1054	-20.7758	-24.1021	-52.1123	-65.079	-50.1862		31.5	-14.549	10.7535	-4.35147	8.97128	3.99576	8.81561	-10.7337	13.7658	-4.78694	6.82709	0.46878	-8.55559	-0.841256								31.5	36.9234	56.7637	9.80259	2.2954
									32	-28.1186	-52.7799	-20.7943	-76.9635	-78.6314	-30.3499	-23.5336	-32.6675	6.30669	-8.56088	-2.72951	-62.8237	-50.6807		32	-16.3491	7.7918	-3.61535	10.5599	10.0628	4.20405	-8.67239	12.4613	-4.04009	6.1155	5.88297	-9.1253	3.62441								32	-8.67902	122.413	56.4776	26.8852
									32.5	-35.8832	-24.961	-35.2052	-68.2675	-79.5794	-30.3134	-23.944	-31.5917	-10.7373	-0.150076	-29.2799	-75.1415	-47.0735		32.5	-6.18638	8.33701	-1.96636	18.1162	3.37551	9.63867	-7.13715	8.72755	-8.41159	11.0541	6.42393	-9.91867	3.43729								32.5	22.0941	258.732	22.8572	-21.9465
									33	-29.0291	-53.2262	-45.9017	-67.3007	-78.5021	-44.249	-40.0391	-18.6655	-10.3273	-35.8603	10.8552	-75.3763	-52.6041		33	-9.89196	1.39951	-4.6121	0.48944	6.1112	5.88706	-9.48909	11.0535	-5.81567	6.32583	9.37435	-6.07005	0.329426								33	18.3219	170.101	34.659	33.017
									33.5	-30.0098	-34.9949	-38.17	-75.1544	-67.8731	-37.167	-6.54373	-26.9647	-27.3138	-4.11667	-52.5137	-33.8219	-42.8946		33.5	-9.12988	12.5869	10.4844	6.36303	7.44953	6.15006	-2.70057	10.5148	-8.54941	10.2252	6.03775	-6.29666	3.27611								33.5	67.1632	-14.3746	32.7948	15.1691
									34	-25.6482	-46.8232	-39.4948	-64.4704	-52.7938	-32.9153	-31.4577	-66.6383	-4.18736	-12.3657	-23.5237	13.0888	-63.1334		34	-7.33513	10.3642	0.700654	5.11037	9.00017	12.6946	-11.0339	9.11668	-7.23481	8.37789	3.56903	-12.5519	0.404947								34	-0.609731	140.628	-2.21153	16.5928
									34.5	-29.9436	-45.2068	-30.6835	-75.0986	-42.2155	-27.2432	-15.5491	-22.3592	-34.198	-35.098	-9.91912	-53.137	-50.0339		34.5	-11.093	21.7152	6.24818	5.43089	1.28489	8.63976	-7.07817	10.7462	-7.5945	7.76434	8.84736	-18.6371	-2.66436								34.5	19.4281	27.4386	40.1338	22.3567
									35	-27.128	-31.2198	-32.1058	-77.6861	-76.5647	-13.998	-35.1462	-33.9449	-32.1653	-17.3082	-23.8091	-59.1227	-48.334		35	-4.4427	13.6598	9.7335	6.21427	7.26055	0.749772	-3.92686	11.6813	-8.90064	3.96395	9.3172	-8.99369	9.27223								35	4.45986	26.8831	7.3984	93.4608
									35.5	-41.007	-57.2862	-39.7715	-81.6961	-25.2518	-43.7275	-31.7707	-60.2785	-36.2912	-6.75104	-21.3049	-37.2383	-42.6987		35.5	-0.996241	6.97659	3.0361	4.56441	4.58074	2.31548	-6.83739	21.8048	-6.66437	10.7181	5.15717	-12.4639	4.52507								35.5	61.1789	121.074	43.4234	37.864
									36	-23.1047	-42.8394	-41.5963	-74.3118	-36.8723	-52.7016	-43.9782	-17.7333	13.5925	-8.79112	-55.6199	-36.6537	-50.7668		36	-3.3327	6.31607	4.0198	9.28351	2.31231	7.75309	-4.56463	12.9532	-4.95975	10.6714	5.70155	-16.8112	4.24737								36	34.7	93.648	13.8397	0.958688
									36.5	-27.6768	-65.3154	-47.7672	-72.2621	-61.5327	-61.0961	-29.7907	-44.9526	-2.14761	-39.2762	-15.4488	-35.0899	-50.1063		36.5	-8.21486	7.77142	9.93049	10.5735	10.0451	4.60107	-3.98834	9.41924	-8.24054	8.882	4.4624	-15.1693	1.24143								36.5	58.3745	113.834	14.1057	27.6948
									37	-33.6643	-59.1077	-46.2627	-63.1391	-80.2436	-31.5664	-44.0617	3.70315	-25.5488	-2.01125	-43.3572	-52.163	-52.4219		37	-2.10012	7.96847	9.22995	22.8868	11.8578	3.33821	-2.62998	8.17583	-4.57018	12.0443	6.04165	-16.0284	-0.475331								37	33.3045	146.622	5.02556	67.0649
									37.5	-30.6619	-27.5923	-16.8207	-73.293	-36.7696	-36.4316	-22.4823	-24.2509	-4.44438	-31.5214	132.653	-53.1531	-53.6617		37.5	1.18854	17.9603	8.93691	16.2865	7.11619	6.1247	-5.57288	8.96747	-6.54506	14.6205	16.1469	-14.6576	0.499377								37.5	25.1878	165.796	34.4253	4.27262
									38	-32.2545	-48.1439	-54.8607	-81.105	-67.2426	-36.565	-35.667	-26.0313	-18.2847	-3.98288	-35.8299	-21.1985	-59.3043		38	-9.24905	13.4096	2.72652	17.1918	4.69231	8.6075	-6.22569	10.2535	-5.90118	20.8375	9.31389	-10.3994	12.2437								38	12.2336	97.1217	-31.043	24.8856
									38.5	-43.2699	-31.6687	-52.6832	-69.8836	-5.0615	-26.5448	-33.0708	8.40868	-11.8694	0.558819	-16.2222	81.1892	-51.9345		38.5	-4.05133	-5.48877	13.1853	25.0467	5.70642	6.60866	-5.6867	12.0645	-6.34494	11.6433	7.04501	-7.04098	-0.437415								38.5	12.7534	208.706	16.0415	16.7045
									39	-29.9681	-67.5337	-65.5037	-80.9631	-42.4113	-31.2033	-25.1265	-16.9763	-9.47248	-4.78615	-46.8909	-26.3686	-55.8381		39	-1.0791	9.74389	18.6626	20.8956	16.1792	5.33997	-3.53377	9.67607	-9.74713	6.51936	4.38158	-18.6236	7.4285								39	15.2832	108.154	8.2777	33.8706
									39.5	-38.9275	-59.6925	-24.1254	-72.157	13.4848	-14.6163	-27.5868	-34.4149	-21.0153	8.73055	-14.102	-79.7572	-63.1631		39.5	-2.4569	-1.05594	21.8959	27.2229	7.67913	-5.49077	-2.67006	7.28047	-10.1106	7.79551	10.7446	-13.3048	1.34246								39.5	23.0788	123.313	2.5839	71.2248
[truncated: 19 more columns]

## Sheet: Fig.4 Supplement 1
4.1B			4.1B									4.1B
INDUCTION SPIKING			20 HZ PARADIGM									20 HZ PARADIGM
20 HZ PARADIGM			CONTROL (spikes/100ms)									CTA (spikes/100ms)
CONTROL	CTA		n = 7/23 cells									n = 9/23 cells
n = 7/23 cells	n = 9/23 cells		Time (s)	Cell 1 - LTD	Cell 2 - LTD	Cell 3 - LTD	Cell 4 - LTD	Cell 5 - no change	Cell 6 - LTP	Cell 7 - LTP		Time (s)	Cell 1 - LTD	Cell 2 - no change	Cell 3 - LTP	Cell 4 - LTP	Cell 5 - LTP	Cell 6 - LTP	Cell 7 - LTP	Cell 8 - LTP	Cell 9 - LTP
LTD = 4	LTD = 1		0	0	0	0	0	0	0	0		0	0.1	0	0.1	0.05	0	0	0	0	0
LTP = 2	LTP = 7		0.1	0.75	4.67462e-17	0.714286	0.05	0.181818	1.5	1.75		0.1	0.3	0	1.85	3.05	1.55	1	1.5	1.35	1
no change = 1	no change = 1		0.2	0.65	0.0526316	0.571429	0	0.636364	1.1875	1.65		0.2	0.1	0.3	0.7	1.55	1.25	0	1.4	1.05	0
			0.3	0.8	0	0.642857	0	0.181818	1.0625	1.75		0.3	0.4	0.35	0.8	1.25	1.25	0	1.25	0.85	0
			0.4	0.35	0	0.285714	0	0	0.75	1.8		0.4	0.3	0.45	0.8	0.95	1.3	0	1.25	0.85	0
			0.5	0.55	0	0.785714	0	0	0.6875	1.9		0.5	0.3	0.35	0.4	0.9	1	0	1.35	0.9	0
			0.6	0.6	0	0.785714	0	0	1.0625	1.5		0.6	0.1	0.3	0.9	0.7	1.05	0	1.4	0.8	0
			0.7	0.5	6.54447e-16	0.714286	0	1.61487e-16	0.8125	1.6		0.7	0.3	0.35	0.45	0.75	1.2	0	1.25	0.85	0
			0.8	0.55	0.368421	0.285714	1.05	0.0909091	1	1.55		0.8	0.2	0.2	0.75	0.7	1.1	0	1.2	0.85	0
			0.9	0.4	0.631579	0.0714286	0.35	0.0909091	0.9375	1.65		0.9	0.2	0.35	0.65	0.65	1.1	0	1.45	0.75	0
			1	0.4	0.105263	0.0714286	0.25	0	0.875	1.5		1	0.3	0.4	0.5	0.6	1.1	0	1.35	0.75	0
			1.1	0	0	0	0	0	0	0		1.1	0	0	0	0	0	0	0	0	0
			1.2	0	0	0	0	0	0	0		1.2	0	0	0	0	0	0	0	0	0
4.1C					4.1C
CONTROL					CTA
n = 23 cells					n = 23 cells
% CHANGE	PAIRED-PULSE RATIO	COEFFICIENT OF VARIATION	DECAY TAU		% CHANGE	PAIRED-PULSE RATIO	COEFFICIENT OF VARIATION	DECAY TAU
-28.6802	1.45444	0.133593	0.00814507		-52.2585	1.75356	0.5093	0.00176687
-45.0029	1.02027	0.13225	0.00893208		-12.2299	1.49011	0.223197	0.00670524
-39.0522	1.30401	0.201438	0.00769272		-17.0475	1.05469	0.174547	0.00728835
-72.8611	0.909818	0.155648	0.00793207		-41.8414	1.40145	0.426581	0.0111218
-51.6257	1.62883	0.373842	0.00797528		-33.4877	2.01124	0.458684	0.00277499
-34.6814	1.56757	0.218817	0.00965392		-3.87455	2.08764	0.349002	0.00918937
-13.6604	1.86744	0.180917	0.0078014		0.637302	2.02273	0.384387	0.00496841
-51.7453	3.7017	0.502321	0.00527245		0.23184	1.21961	0.143851	0.00909576
-27.6419	1.66656	0.155974	0.00906519		-9.71361	1.0467	0.319334	0.0082517
-26.3468	1.59419	0.231581	0.00777681		1.64458	1.73982	0.247871	0.00663206
-18.8635	1.17849	0.5077	0.0061046		-10.0929	1.80831	0.643241	0.0061515
-14.3235	1.5334	0.16587	0.0102294		-8.78957	1.20036	0.267519	0.00302938
-39.1355	2.19864	0.570045	0.00939906		26.5361	1.13012	0.177535	0.00990149
-26.2441	1.07739	0.434141	0.00210838		123.074	2.67997	0.367131	0.00335932
-10.0102	1.96333	0.344698	0.00476271		16.1795	1.0669	0.215777	0.00912913
1.82522	1.54554	0.287274	0.00892879		28.3829	0.477726	0.161472	0.00508561
1.38313	2.50327	0.752834	0.00477673		93.0967	1.98957	0.613515	0.00513631
21.2528	1.30799	0.474562	0.00813693		93.802	1.06724	0.301404	0.00940551
33.3644	1.44043	0.26578	0.016846		26.4443	1.35337	0.372261	0.0106489
66.3022	1.9713	0.342344	0.00585612		47.005	1.44977	0.286872	0.00369602
18.8241	1.32139	0.217277	0.00998019		23.091	1.50969	0.417457	0.00847708
120.276	1.54382	0.472695	0.00558851		114.488	1.40542	0.469786	0.00738894
102.313	1.10839	0.0901955	0.0096333		93.9988	1.19607	0.207151	0.0103509

## Sheet: Fig.4 Statistics
	PANEL	SAMPLE SIZE	STATISTICAL TEST	TEST STATISTICS	p-VALUE
	4B, Distribution of plasticity induction	Control, n = 23 cells; CTA, n = 23 cells	3x2 Chi Square	chi square = 6.14, df = 2	0.046421
	PANEL	SAMPLE SIZE	STATISTICAL TEST	D Mean [CI, lower limit, upper limit]	p-VALUE
	4C, Paired-pulse ratio: Control, pre vs. post	Control-LTD, n = 13 cells	Paired permutation t-test	-0.31 [95%, -0.91, -0.05]	0.0974
	4C, Coefficient of variation: Control, pre vs. post	Control-LTD, n = 13 cells	Paired permutation t-test	-1.54e-3 [95%, -0.11, 0.05]	0.958
	4E, Paired-pulse ratio: CTA, pre vs. post	CTA-LTP, n = 11 cells	Paired permutation t-test	-0.17 [95%, -0.38, 0.00]	0.0872
	4E, Coefficient of variation: CTA, pre vs. post	CTA-LTP, n = 11 cells	Paired permutation t-test	-0.06 [95%, -0.15, 0.12]	0.4082
	PANEL	SAMPLE SIZE	STATISTICAL TEST	TEST STATISTICS	p-VALUE
	4.1B Distribution of induction spiking	Control, n = 23 cells CTA, n = 23 cells	2x2 Chi Square	chi square = 0.2, df = 1	0.7518
	4.1C, Initial PPR/induced plasticity correlation	Control, n = 23 cells	Spearman rank order correlation	rs = 0, t = 0, df = 21	1
		CTA, n = 23 cells	Spearman rank order correlation	rs = -0.0687, t = -0.32, df = 21	0.7521
	4.1C, Initial CV/induced plasticity correlation	Control, n = 23 cells	Spearman rank order correlation	rs = 0.1202, t = 0.55, df = 21	0.5881
		CTA, n = 23 cells	Spearman rank order correlation	rs = -0.1246, t = -0.58, df = 21	0.5681
	4.1C, Initial Decay tau/induced plasticity correlation	Control, n = 23 cells	Spearman rank order correlation	rs = 0.0732, t = 0.34, df = 21	0.7372
		CTA, n = 23 cells	Spearman rank order correlation	rs = 0.1135, t = 0.52, df = 21	0.6085
