# Supplementary material for: LTD at amygdalocortical synapses as a novel mechanism for hedonic learning
Source: eLife. 2020 Nov 10;9:e55175. doi: 10.7554/eLife.55175 (PMC7655100; doi:10.7554/eLife.55175)
Supplement: Figure 5—source data 1. — Excel worksheet tabs are labeled to indicate the specific figure. Each data table is labeled to indicate the specific figure panel. The statistics worksheet indicates specific tests and values applied to each data set in the figure and supplements. [file elife-55175-fig5-data1.xlsx]

## Sheet: Fig.5 Values
	5B			5C					5D											5D												5E					5F									5F
	PLASTICITY INDUCTION			CONTROL					CONTROL - PLASTICITY TIMECOURSE (% change)											CONTROL - SERIES RESISTANCE (% change)												CTA					CTA - PLASTICITY TIMECOURSE (% change)									CTA - SERIES RESISTANCE (% change)
	CONTROL	CTA		n = 9 cells					n = 9 cells											n = 9 cells												n = 7 cells					n = 7 cells									n = 7 cells
	n = 9 cells	n = 7 cells		PAIRED-PULSE RATIO		COEFFICIENT OF VARIATION			time (min)	Cell 1	Cell 2	Cell 3	Cell 4	Cell 5	Cell 6	Cell 7	Cell 8	Cell 9		time (min)	Cell 1	Cell 2	Cell 3	Cell 4	Cell 5	Cell 6	Cell 7	Cell 8	Cell 9			PAIRED-PULSE RATIO		COEFFICIENT OF VARIATION			time (min)	Cell 1	Cell 2	Cell 3	Cell 4	Cell 5	Cell 6	Cell 7		time (min)	Cell 1	Cell 2	Cell 3
	LTD = 9	LTD = 7		pre-induction	post-induction	pre-induction	post-induction		-10	-9.47862	-15.6481	3.30211	28.9479	21.8979	12.1776	27.3523	-22.7936	-26.7244		-10	0.810841	-0.438928	-0.731714	-3.56139	-0.673239	-2.80847	-2.88628	-0.973947	4.26109			pre-induction	post-induction	pre-induction	post-induction		-10	-1.82821	13.9051	-11.3384	5.32919	-9.63426	-5.03435	2.67467		-10	-0.961038	-8.00192	-1.3878
	LTP = 0	LTP = 0		1.11579	0.65767	0.129041	0.124018		-9.5	21.8837	-7.41336	-5.4624	15.074	-1.22917	27.8751	29.8121	15.1459	13.8848		-9.5	-1.31034	-3.3947	0.969149	-0.561736	-0.346853	-1.97377	-0.867495	2.30616	3.78193			0.956603	0.458348	0.138803	0.203445		-9.5	-7.74328	-15.6435	-3.19266	36.7257	6.15476	-18.2006	-62.0443		-9.5	-4.1121	-6.43593	1.42603
	no change = 0	no change = 0		1.27117	0.963485	0.20499	0.224769		-9	15.3326	1.44778	24.5931	15.2911	40.3842	-2.79688	-19.5452	-2.89054	-4.92877		-9	3.47008	-3.51327	5.69813	-3.65517	0.522827	2.85024	-2.44603	-1.00309	2.57639			1.02	0.960772	0.311546	0.433005		-9	12.785	-12.2981	5.09833	11.1525	0.324416	-15.0285	-4.07463		-9	-5.37933	-4.41945	-2.933
				1.51643	0.932797	0.163739	0.174575		-8.5	-29.2395	-1.21604	7.2153	-9.18141	19.6576	19.2882	-65.5218	-2.99499	-4.29085		-8.5	-0.392868	-1.145	1.38317	0.527217	2.56237	-5.02301	-2.20427	-0.0427978	2.21648			0.841222	0.886624	0.344442	0.380423		-8.5	-4.59866	5.93439	7.59257	14.2433	24.7071	-30.5808	-26.3412		-8.5	-1.41944	0.775365	-3.41048
				1.33816	0.954417	0.117992	0.125469		-8	10.1485	-9.66942	6.91483	-8.06927	13.7128	28.6069	18.4893	1.46812	8.15661		-8	-4.88915	-2.84914	20.8455	-0.617627	3.95446	7.44557	-3.63645	3.42175	1.22079			1.4967	1.05722	0.161152	0.158388		-8	-52.3596	20.8267	10.853	-13.4894	-52.4543	1.85766	45.3303		-8	-0.820891	-1.77613	-0.377108
				1.17489	0.986967	0.225625	0.252754		-7.5	-8.68668	15.3104	43.8963	10.9191	5.8049	-5.16376	-21.8176	-2.97652	-48.1428		-7.5	0.219839	-1.97271	7.74412	1.45097	-2.21528	-2.05234	-0.720999	0.84909	0.254255			1.03138	0.615838	0.10009	0.190719		-7.5	20.2355	19.2388	2.64576	16.7546	9.59727	-10.0285	48.2373		-7.5	-3.18105	-0.342227	6.35668
				0.903785	0.555633	0.138086	0.274752		-7	17.7673	-23.5255	11.8053	-7.95369	3.97078	-5.93625	0.0521645	25.6121	2.46266		-7	2.9095	-3.4309	-5.17576	-1.32498	4.4481	-6.31426	0.49753	-0.596436	1.98374			0.851553	0.347245	0.178341	0.198834		-7	-12.857	-16.4624	10.9097	12.2765	21.4963	-16.6478	-31.9921		-7	-0.632941	1.96607	1.67351
				1.12546	1.11487	0.188636	0.277489		-6.5	18.8644	1.84328	32.7262	-2.13897	22.7887	-5.28394	13.6852	-12.6721	15.3907		-6.5	7.59015	-2.97264	-2.87685	4.74154	3.169	-1.10411	-1.35459	3.19967	2.7054			1.01574	0.463611	0.169316	0.146067		-6.5	-53.9193	10.6222	16.0487	8.26441	16.4831	13.0695	-6.60482		-6.5	-5.3059	0.607155	-1.16768
				1.11826	1.03969	0.198404	0.218763		-6	-1.77157	11.5106	6.37066	5.37924	-1.79412	-4.40663	-4.78614	12.7743	-13.6791		-6	9.10699	-2.22751	-3.92795	-0.244982	4.59646	-1.47384	-2.12295	-4.92753	4.8595								-6	-45.389	10.8963	13.3867	38.203	-2.46321	14.6939	64.0098		-6	-0.178118	1.31473	1.23022
				1.44609	1.04177	0.250931	0.130894		-5.5	8.15138	-12.0431	11.9006	19.3653	-23.244	10.1045	8.63531	0.772669	31.9934		-5.5	12.8412	-0.374583	-2.19927	-2.01566	3.55891	-2.88592	-0.333749	-0.100998	2.59982								-5.5	-39.4524	-20.7612	1.32506	-5.68696	7.55234	-2.86415	-7.41036		-5.5	0.807393	-0.820228	-0.115247
									-5	17.6656	17.7396	18.6921	3.08775	-11.6489	-6.70875	22.215	1.60759	-14.6702		-5	10.7143	-3.10418	1.66074	-1.60714	-0.922744	-1.24954	2.16146	1.43938	1.77831								-5	-3.71891	-0.857971	7.74124	-22.9224	3.77277	-6.19869	27.1314		-5	0.265983	-2.32464	1.59533
									-4.5	-4.88689	5.38399	-0.471348	11.5447	-15.9578	23.793	31.9004	-0.225926	19.2452		-4.5	10.7989	-1.89993	-2.35966	-1.33346	-4.79236	-2.19373	3.77886	-1.02821	-15.6078								-4.5	-8.60884	18.3488	7.31064	-12.8664	-2.51339	14.273	11.9641		-4.5	-3.9647	7.01905	-0.513233
									-4	17.7206	-8.94772	6.12981	-10.3668	-2.31735	7.77498	17.8706	-11.5989	6.02147		-4	5.1746	3.7094	-6.21107	-1.71568	-1.88497	-0.701967	-1.09602	-3.01705	-3.69465								-4	-15.9669	11.8616	-8.98416	-6.85421	8.745	10.3752	-32.6852		-4	1.34795	4.52158	2.05844
									-3.5	1.77682	-4.19815	-13.3794	-9.41459	10.2431	-50.7678	28.4092	-26.9027	-1.06338		-3.5	4.09638	4.07115	-2.80578	5.39759	-1.6921	-3.89661	2.19633	-0.981948	10.3794								-3.5	14.0047	13.5038	-0.997247	-1.44037	-20.952	7.90387	-17.5148		-3.5	-1.56798	-1.50781	-4.07989
									-3	-8.3969	-3.78316	-26.37	-0.484537	-24.9696	22.2347	-10.3807	-3.58408	12.3431		-3	-2.33281	4.88477	-3.82181	-0.190405	1.32919	-2.21695	2.33301	-1.84469	-3.07926								-3	12.9911	-10.3217	-18.4123	-8.24172	-3.45682	-14.4495	11.0714		-3	-0.277723	-1.21165	-0.740841
									-2.5	-18.8188	25.9419	-36.0144	-28.9963	5.77769	-14.5278	3.9314	15.2491	15.6849		-2.5	-11.2754	3.70324	-5.22087	3.59538	-6.44493	5.66817	4.64627	3.19408	-4.26601								-2.5	53.193	20.1431	-15.201	-23.2641	1.92523	18.2403	-33.807		-2.5	4.52095	5.9013	1.15494
									-2	-17.3053	7.04175	-20.0702	-9.23114	4.80924	-21.3267	-11.5641	10.3924	5.25538		-2	-12.6157	-1.87483	-6.63875	3.86877	-0.172923	5.79076	0.934293	-2.02965	-5.96091								-2	64.8351	-9.5385	-1.68275	-4.84862	8.9541	12.1107	-4.22618		-2	1.11162	-1.62036	-0.706097
									-1.5	5.40645	0.632975	-23.3629	-2.52201	-10.7814	1.20446	-19.9134	-7.688	-32.4147		-1.5	-18.571	1.10524	1.67271	-0.160925	-0.640246	5.08894	1.11734	-1.88286	-3.41621								-1.5	64.9906	-10.4213	-2.41068	-8.04437	6.93928	5.61787	-3.41175		-1.5	2.95175	3.73106	-2.18796
									-1	-33.1723	0.423679	-2.66617	-4.06422	-32.7279	-24.4186	-30.1551	11.5203	29.8393		-1	-9.0635	5.17804	-3.36787	-4.80116	-2.18191	-0.524965	1.50862	1.13503	-2.98971								-1	17.244	-23.9226	-8.0216	-10.4003	-6.74627	7.562	-6.4358		-1	7.72295	0.571291	-1.69485
									-0.5	-2.96077	-0.831373	-45.7495	-17.1861	-24.3766	-11.7223	-18.6688	-0.215099	-14.3636		-0.5	-7.28207	6.54646	5.3638	2.20884	-2.17376	7.57579	-1.50486	2.88406	0.397433								-0.5	-13.837	-25.0533	-12.6711	-24.8905	-18.4315	13.3288	26.1294		-0.5	9.07263	2.05275	3.81903
									RAMP protocol											RAMP protocol																	RAMP protocol									RAMP protocol
									0	-15.8493	19.2408	-8.2219	-74.1207	-51.6978	4.04338	-73.1645	-75.0607	5.23645		0	-21.1415	1.44182	-18.4831	3.07601	-4.16811	-10.0733	-0.948774	-2.75815	-13.1844								0	-25.2035	6.27903	-31.8216	-64.8837	76.1942	-41.6587	-69.6311		0	2.53422	5.00886	1.34636
									0.5	-25.2414	15.7506	-41.9894	-80.1251	-36.4135	-28.2404	-76.4447	-77.2325	5.19057		0.5	-7.63051	-7.1474	-23.7161	9.18135	-1.87808	-6.28077	-6.54057	1.49158	-10.0079								0.5	-27.8624	-37.2514	-53.6756	-47.7114	42.6666	-21.8012	-35.1311		0.5	-1.27461	5.04133	-1.49796
									1	-40.111	-5.34927	-24.3311	-69.0898	-69.8902	-24.6997	-81.2819	-58.9124	-4.12044		1	-9.04112	-6.67176	-26.8881	8.56871	2.6845	3.75034	-1.35812	0.388829	-10.6603								1	-23.926	-31.1874	-52.5643	-61.6245	27.9473	-4.3091	-0.571115		1	1.91105	3.29891	-1.78873
									1.5	-41.8443	-32.0762	-25.387	-67.3092	-67.4732	-53.046	-82.9815	-45.029	-5.56887		1.5	-6.80831	-6.84042	-18.6035	5.6262	-2.08147	-2.53916	-7.0063	-1.19464	-7.2422								1.5	-16.1584	-47.1846	-64.5695	-56.9511	-11.6248	0.646279	-53.5477		1.5	2.83601	1.63641	-3.72357
									2	-49.0002	-15.7736	-45.3617	-49.2713	-76.4494	-57.1312	-82.6537	-46.7451	-20.8229		2	1.57073	3.22327	-13.0136	8.79069	-0.0241268	1.33603	-5.97075	-1.77613	-4.98722								2	-71.9945	-43.1213	-71.1737	-63.8173	-14.4676	-23.686	-84.7961		2	8.14372	8.17248	11.7082
									2.5	-46.1278	-5.79818	-46.4	-51.2401	-56.8303	-56.7622	-85.035	-30.3334	-35.7846		2.5	-18.7766	-0.481778	-12.3942	2.40373	-0.297029	-2.44343	-8.48927	0.925023	-7.47416								2.5	-49.6877	-36.604	-44.3657	-70.3051	-6.91271	-32.2309	-61.5683		2.5	13.5307	1.02113	0.172977
									3	-50.1729	-39.6503	-60.036	-36.9116	-77.2336	-78.675	-82.3182	-20.8754	-36.6614		3	0.576255	-5.23745	-12.4941	6.30521	-3.71883	5.38983	-1.37437	-0.407755	-4.24049								3	-40.5243	-6.74176	-55.1693	-77.415	-22.0781	-18.0326	-63.8571		3	10.7649	7.56098	-3.79197
									3.5	-53.284	-25.5542	-49.8291	-27.9265	-76.6281	-61.6548	-83.8125	-57.4937	-50.1842		3.5	1.79188	2.67124	-7.85365	6.4746	1.75676	16.3857	10.0419	0.479368	-2.59992								3.5	-55.5599	-26.8066	-77.9635	-63.7425	-16.1212	-38.7059	-46.0261		3.5	3.65203	6.98076	-0.694191
									4	-56.6253	-28.3619	-61.8434	-14.0291	-66.1138	-58.653	-81.5145	-33.6998	-50.6821		4	4.46094	2.27987	-4.96438	9.88703	1.52743	4.23023	7.52796	-0.85435	-6.12961								4	-60.9257	-21.2984	-58.6517	-74.8981	-26.9072	-30.5235	-68.6124		4	12.47	13.8276	-3.35765
									4.5	-33.2228	-26.7047	-51.1144	-39.8522	-72.2635	-83.3142	-82.4535	-1.56269	-78.9408		4.5	32.115	2.88488	-10.8717	3.55244	-2.25656	5.09678	-4.82975	1.38963	-3.41102								4.5	-68.3778	-31.1755	-54.6704	-60.3243	-45.8261	-21.8909	-82.0443		4.5	2.30113	-2.0132	3.58588
									5	-49.5922	-19.1967	-42.048	-35.8291	-71.313	-78.4604	-82.9309	-15.487	-54.6534		5	32.0495	3.65538	-9.49902	4.18042	3.52162	7.48156	1.82157	1.8555	-6.73766								5	-63.1322	-31.1392	-56.8546	-66.6681	-34.1297	-28.9572	-80.6041		5	8.28626	22.0554	7.82856
									5.5	-56.5457	-41.543	-61.977	-15.1769	-75.7012	-73.1907	-84.0127	-27.3981	-65.4209		5.5	1.28331	2.87007	2.71913	12.0446	5.8259	11.9233	5.06459	1.13622	-6.80432								5.5	-35.71	-36.2336	-51.6776	-75.1008	-42.9493	-24.3037	-86.533		5.5	11.2825	6.49686	0.245727
									6	-68.3951	-30.8235	-48.0287	-30.9639	-54.8983	-82.6585	-81.5021	-30.7512	-40.7573		6	15.0808	1.3222	-8.15265	11.7016	-2.8957	3.79548	0.850034	-2.12354	-4.6724								6	-53.678	-21.7761	-66.8057	-73.603	-59.2605	-28.7746	-80.0858		6	5.99633	5.526	8.17929
									6.5	-46.1784	-21.1143	-70.6056	-5.1058	-79.4574	-73.034	-82.3309	-31.0193	-63.1366		6.5	0.845457	0.893741	-18.64	3.99471	6.21673	1.90411	1.82307	-3.01924	-4.76841								6.5	-79.7581	-26.634	-64.2482	-77.2273	-52.6241	-44.7746	-80.9876		6.5	5.50332	4.77806	2.26559
									7	-45.9072	-40.7788	-65.7183	-12.4701	-53.8985	-81.8456	-74.6235	-29.6373	-64.6208		7	-6.88256	4.58618	-16.3816	9.7611	-0.945976	5.16124	-3.64117	-2.00279	-9.39719								7	-80.8593	-46.8548	-70.2201	-67.5909	-22.9454	-20.5752	-83.7454		7	5.56031	5.1734	4.58716
									7.5	-73.6173	-41.5665	-79.5209	-36.2292	-64.9758	-77.2877	-81.5507	-29.2622	-66.8721		7.5	-2.91726	4.59661	-11.0302	6.59706	1.26527	6.89222	2.2464	-0.807347	-7.28315								7.5	-75.3538	-22.3925	-64.3951	-74.1374	-57.7297	-54.8099	-80.2443		7.5	9.09909	14.6076	7.06464
									8	-64.2013	-29.7452	-69.2305	-3.91974	-70.0109	-74.9961	-83.2099	-44.1866	-55.3676		8	8.23474	4.3128	-12.2361	4.9884	1.81301	-1.5058	5.44346	-2.79892	-0.804879								8	-70.16	-44.5576	-66.1054	-74.354	-35.7	-41.633	-82.0599		8	10.7406	8.15456	5.87897
									8.5	-62.1435	-35.0929	-80.4892	-23.3113	-62.9305	-79.4323	-82.0634	-31.7835	-34.7805		8.5	12.1057	2.34045	-11.3264	4.55288	1.42501	9.35707	4.18396	-3.05705	-3.9401								8.5	-47.9619	-4.02129	-76.1808	-60.7533	-42.6856	-54.5641	-50.4541		8.5	6.40773	15.1948	0.796816
									9	-63.3691	-37.8805	-70.9749	-19.1121	-56.4444	-84.8294	-82.7521	-40.0173	-63.3001		9	8.63922	1.32089	-15.706	2.10623	1.995	28.9961	7.58088	1.28847	-6.5625								9	-39.91	-30.9452	-73.5421	-68.9337	-35.5007	-44.2838	-75.7181		9	-0.182947	5.55656	8.59965
									9.5	-74.6241	-45.3699	-60.4702	-16.5027	-68.33	-85.8438	-82.4079	-56.0526	-57.604		9.5	12.4171	7.96579	-6.83605	8.08678	0.106486	6.22778	3.21885	-1.80312	-8.45692								9.5	-40.2833	-31.5706	-79.6497	-86.2017	-60.7322	-72.0135	-81.5655		9.5	2.67437	15.8287	3.76734
									10	-78.2312	-30.2345	-70.6774	-9.46298	-75.9278	-78.2364	-78.7808	-32.0587	-39.6013		10	6.22513	5.71833	-9.67734	11.4957	2.53813	9.13739	5.73489	-2.28853	-6.93735								10	-57.434	-39.262	-73.2829	-78.2389	-57.0713	-58.0057	-81.5903		10	6.17359	1.61521	1.98528
									10.5	-68.4268	-40.4347	-67.0416	-52.2503	-77.2423	-84.5297	-78.0082	-25.45	-54.2042		10.5	-10.4744	3.98305	-6.52925	9.41522	0.270103	29.017	1.70652	-5.37583	-5.90454								10.5	-33.5829	-35.5949	-78.7846	-64.8247	-35.7873	-66.3934	-85.1267		10.5	2.71646	6.95006	3.4371
									11	-55.7125	-45.6072	-76.0972	-31.7703	-71.8587	-85.5155	-79.486	-38.9202	-48.2285		11	7.51541	4.26715	-5.64816	3.56737	1.08938	11.0632	5.59788	-2.69584	-6.3715								11	-79.1005	-37.4687	-66.6523	-58.4768	-43.3805	-71.5271	-85.0121		11	-6.12744	14.454	8.20907
									11.5	-66.6396	-46.2058	-65.8451	-31.5566	-75.2152	-86.6201	-76.6639	-29.3947	-26.602		11.5	-6.17853	1.83801	-9.34221	4.33647	0.675916	8.61254	7.74163	-3.36827	-4.99224								11.5	-76.4566	-37.2123	-73.0892	-72.2349	-31.8009	-54.0534	-81.481		11.5	3.85118	13.7657	3.47391
									12	-73.6635	-52.3089	-82.7586	-35.5183	-66.3028	-83.2359	-79.8172	-33.1477	-72.7111		12	7.91351	2.17485	-13.9607	10.636	-0.120646	8.13925	20.9136	-2.30022	2.13771								12	-56.1534	1.06595	-71.2904	-70.2587	-40.9084	-53.4531	-68.8957		12	3.95136	15.8176	28.6443
									12.5	-68.8565	-42.7633	-77.9794	-43.6798	-74.3026	-76.7591	-81.1437	-20.4729	-54.3867		12.5	7.51239	5.07332	-8.04341	5.119	4.23041	7.9858	6.75861	-3.95088	-4.05297								12.5	-71.3919	-10.2497	-79.5147	-65.3874	-52.405	-59.6167	-83.5944		12.5	2.43123	18.2518	18.9035
									13	-78.0151	-45.2506	-75.6848	-43.1393	-71.8183	-75.2868	-79.2777	-38.0572	-43.1751		13	5.13985	5.34364	-6.90052	3.48252	-0.522644	9.19355	3.51054	-4.83313	-4.19794								13	-69.3687	-25.2578	-80.7169	-85.4129	-42.832	-52.3417	-78.1959		13	6.49495	13.1404	10.906
									13.5	-57.1883	-52.3328	-73.9212	-54.6159	-83.134	-84.6645	-80.6715	-19.7265	-37.1206		13.5	14.6938	8.45656	2.56252	4.95964	8.13399	0.967529	4.64945	-2.96659	-6.54792								13.5	-85.5664	-12.8739	-74.5643	-61.7269	-29.3398	-69.0944	-60.2307		13.5	3.08957	13.347	18.3869
									14	-73.2061	-46.6904	-85.8994	-50.0295	-66.1787	-79.7059	-78.5011	-33.4789	-48.1119		14	6.56015	4.84561	-3.6653	11.3941	3.56425	14.5339	3.05357	-5.64072	8.75933								14	-68.5066	-1.16734	-71.0858	-70.3382	-45.6183	-44.7098	-65.5181		14	4.24978	13.5859	7.49505
									14.5	-57.4271	-35.614	-62.5284	-42.0243	-63.7775	-88.105	-82.7197	-35.6658	-50.9225		14.5	-5.3896	7.39941	-10.3325	16.7328	5.17439	3.61397	5.03975	-4.57112	-2.04228								14.5	-62.9504	-25.8179	-75.4946	-71.2386	-24.0312	-61.5097	-80.4482		14.5	1.302	14.6939	2.70128
									15	-77.6316	-55.3634	-70.9285	-33.7355	-53.4415	-83.422	-74.0013	-28.8502	-45.8503		15	1.44658	8.08528	-10.1513	3.58138	6.61554	0.0721027	5.00531	0.132796	-5.03019								15	-59.1842	-35.5257	-66.8594	-74.0709	-35.6884	-61.9229	-83.5074		15	-1.98178	12.2345	8.23736
									15.5	-81.1146	-36.0701	-61.8532	-37.2546	-73.5505	-83.6827	-80.9656	-45.8135	-39.1303		15.5	5.74849	10.6244	-13.3613	10.3502	4.27193	5.58318	5.85924	-1.04705	-4.07859								15.5	-23.3835	-40.4881	-78.3459	-73.5201	-39.6605	-44.3984	-83.6971		15.5	-1.6356	14.0452	5.00165
									16	-63.9914	-43.8944	-75.1648	-32.4235	-57.4834	-81.6222	-82.7693	-31.111	-50.9972		16	-10.3048	6.2405	-4.90506	6.41348	5.81008	13.2609	12.5702	-5.02016	0.828805								16	-36.6944	-41.3604	-66.0372	-69.3088	-31.0644	-55.1162	-79.1891		16	9.40993	11.8063	3.46029
									16.5	-76.4715	-45.8669	-84.6513	-47.9402	-69.7921	-84.7746	-82.3911	-18.2904	-65.6875		16.5	-4.42885	6.49956	-7.42465	7.46522	9.36525	13.0127	6.27339	-2.15201	-4.77626								16.5	-60.2967	-19.2434	-71.7039	-57.657	-62.0533	-59.4084	-77.2493		16.5	4.85635	10.078	0.7365
									17	-73.2851	-47.75	-69.0114	-36.6936	-83.2952	-82.4923	-82.7356	-21.6893	-68.0757		17	4.19676	3.54412	-8.33713	4.77114	10.7317	8.88859	9.26574	-2.95671	-4.57112								17	-77.326	9.35607	-72.8739	-66.1034	-58.0771	-54.3004	-53.8458		17	7.49321	10.117	5.24838
									17.5	-79.2421	-53.1513	-52.6257	-13.0124	-74.5589	-81.2994	-83.7886	-31.4033	-47.9014		17.5	6.16605	7.29388	-9.91297	9.01875	6.79948	6.66805	6.15134	-4.41908	-3.87157								17.5	-31.9396	-41.452	-72.0164	-76.5296	-30.1087	-56.6588	-70.3813		17.5	7.28035	12.1384	4.82899
									18	-78.6613	-49.3505	-66.2444	-17.7708	-84.195	-83.7393	-85.0055	-32.7751	-40.0524		18	20.2866	8.20354	-7.53372	1.50832	10.113	11.1246	9.81287	-5.17501	-3.79779								18	-0.894234	-33.6366	-73.7417	-56.9164	-39.2488	-60.7287	-69.5069		18	7.33911	15.2138	2.41452
									18.5	-76.8602	-42.2848	-71.2223	-28.3344	-77.7711	-84.9284	-85.8044	-32.6089	-41.6753		18.5	4.92122	10.4604	-11.2474	0.713974	8.46008	5.8659	5.77225	-5.52381	-4.11329								18.5	-52.8786	-36.2684	-72.322	-57.7641	-35.8224	-53.2808	-63.6135		18.5	10.8953	9.39153	0.186393
									19	-76.9747	-47.349	-48.228	-22.347	-76.8034	-87.5143	-81.1199	-18.7884	-46.1192		19	21.698	0.495219	-8.2462	2.27888	2.54424	6.73016	7.17484	-1.66918	-7.72604								19	-67.8566	-16.9019	-72.5691	-60.3852	-42.9524	-53.8914	-85.3746		19	-7.41212	4.27877	-0.609173
									19.5	-79.4745	-64.3752	-68.1054	-30.4747	-63.7744	-83.6056	-85.367	-35.997	-40.6133		19.5	5.80906	7.55737	-8.51279	4.02577	-0.842165	2.77476	-3.89065	-5.22163	-4.17409								19.5	-11.7377	-12.6265	-78.9302	-60.8477	-8.12795	-56.7675	-71.4055		19.5	9.31923	13.8298	-1.17779
									20	-63.15	-38.7321	-54.6307	-7.40736	-75.2133	-73.0114	-82.4253	-4.8285	-28.8752		20	2.26814	4.76038	-4.49566	3.98059	5.8066	21.5194	4.33866	-3.86046	-6.35578								20	-55.1786	-8.18708	-75.244	-70.8214	-43.1707	-58.9661	-45.9351		20	6.22358	11.4792	1.70729
									20.5	-71.5299	-47.3948	-69.3673	-13.9781	-69.59	-57.1107	-82.1441	-20.9831	-55.5025		20.5	12.8568	4.51527	-5.3888	0.246627	8.09358	20.1547	4.56761	-1.62802	-1.15297								20.5	-17.386	-15.2902	-72.5	-55.5625	-50.5886	-58.9977	-75.4029		20.5	5.82462	9.88149	0.122159
									21	-46.3321	-39.0797	-63.4274	-24.4759	-72.3734	-75.6789	-84.1012	-23.1286	-56.7545		21	13.0562	3.66563	-1.80623	2.0156	13.7411	24.0351	8.0739	-5.76614	-2.70366								21	-21.7587	-45.4075	-75.4217	-48.0549	-47.1933	-66.2742	-80.3512		21	-3.34485	7.62183	0.482786
									21.5	-69.8079	-51.8486	-73.088	-27.647	-65.734	-84.2286	-83.8216	-24.7615	-55.8486		21.5	4.103	3.1454	-5.716	-4.02927	9.50501	0.724733	7.07319	-3.83837	-3.58439								21.5	-40.9756	-31.7518	-76.9237	-63.9238	-42.7781	-70.4984	-70.7339		21.5	-2.04884	13.6434	-0.501921
									22	-78.7316	-47.4653	-82.7399	-24.5316	-80.7788	-78.8039	-83.8212	-23.6337	-52.5872		22	5.02512	7.50515	-1.85925	1.79963	8.43212	13.2407	11.3461	-4.60083	-1.92939								22	-32.1683	-35.4399	-77.0078	-64.4068	-53.0186	-51.5947	-88.082		22	12.5189	10.7062	0.109192
									22.5	-64.7718	-50.4687	-66.4954	-10.7384	-71.0489	-77.2783	-80.985	-33.0254	-55.9798		22.5	3.68364	-1.0274	-6.07161	0.967022	10.2916	7.14838	5.9692	-3.27893	-1.43738								22.5	8.08013	-1.14542	-73.8766	-65.9935	-47.7506	-70.7286	-72.6498		22.5	6.86349	8.16147	-1.67359
									23	-62.4328	-46.0062	-67.293	-47.5359	-65.4597	-86.6062	-85.0839	-29.7539	-63.0091		23	5.99216	-3.05699	-4.30334		11.9363	13.9251	9.81813	-6.51221	-5.09151								23	-67.142	-9.26965	-79.3798	-68.328	-36.8704	-49.9897	-77.5316		23	8.74414	7.71539	-1.39451
									23.5	-65.9101	-49.802	-70.6096	-9.52413	-63.4441	-79.7176	-83.1422	-32.984	-54.212		23.5	15.3065	2.61562	-6.89717	-1.44936	11.4589	3.76049	4.68922	-1.19464	-0.884537								23.5	-32.1427	-40.9152	-77.1412	-68.3551	-36.7883	-37.6988	-85.5688		23.5	8.73723	17.6161	-0.782248
									24	-79.7234	-42.2531	-69.5812	-48.1113	-75.4865	-86.0634	-85.0324	-27.5561	-43.9394		24	20.2433	0.589084	-2.70263	-2.77576	8.09467	4.28989	6.97588	-1.23275	-3.67629								24	21.0956	-15.4485	-67.0023	-74.8699	-33.5017	-42.0124	-86.9711		24	8.63351	14.2429	1.16012
									24.5	-80.3598	-49.6689	-66.5733	-42.9566	-53.9203	-79.9487	-86.0107	-31.0123	-52.8449		24.5	12.6681	16.3196	-7.21238	0.80496	8.47559	0.405461	6.03366	-3.32416	-3.07345								24.5	-8.70477	-19.7216	-79.4698	-76.1809	-39.2888	-50.2932	-80.1289		24.5	6.86382	21.6602	4.05008
									25	-73.4897	-44.5779	-62.5107	-46.9861	-59.3872	-80.818	-79.2293	-41.0212	-31.5083		25	7.52349	1.14752	-1.24554	0.592327	16.3751	-14.1009	6.20373	-2.57262	-0.776878								25	-67.1309	-28.6052	-79.5562	-72.7316	-68.6277	-35.7085	-52.1604		25	9.67212	13.9056	-2.76705
									25.5	-82.314	-50.124	-85.3492	-19.5784	-62.6776	-83.9181	-83.6134	-34.4513	-41.4497		25.5	21.338	3.1109	-6.2289	7.69683	8.70391	18.8813	9.67121	-4.81835	-1.74882								25.5	-53.5741	-45.3866	-73.8772	-59.6483	-67.1637	-43.7743	-78.7028		25.5	2.33292	25.2537	-2.60942
									26	-78.079	-45.2651	-80.2535	-2.28412	-61.8675	-84.138	-83.8862	-36.3615	-56.9675		26	6.66534	-1.14376	-6.15755	-0.449765	9.03531	0.269823	7.75596	-2.96878	-3.38043								26	-67.8346	-32.2528	-80.986	-68.4357	-36.0649	-44.9616	-53.8551		26	7.55978	13.8772	2.22738
									26.5	-69.2651	-39.7238	-69.4507	-30.9075	-59.4896	-83.6814	-80.2741	-40.8627	-69.7668		26.5	16.3385	2.95494	-6.97409	4.54051	8.64347	10.4722	3.49265	-4.30179	-3.52398								26.5	-31.27	-34.3631	-76.5055	-79.4068	-43.0882	-39.2703	-86.3749		26.5	12.8383	19.0702	-0.40556
									27	-71.1488	-45.1787	-57.8753	-31.6534	-58.7133	-90.6909	-76.9361	-36.379	-68.3365		27	17.2289	-0.228553	-3.97069	-1.60377	9.43421	2.0412	0.399358	-4.98281	-6.6666								27	-50.826	-23.0469	-75.5014	-67.8182	-23.6658	-60.0842	-76.6243		27	12.7325	15.0919	1.01515
									27.5	-77.6304	-46.7032	-66.8518	-31.5996	-73.3921	-83.1597	-82.2342	-40.6882	-49.1129		27.5	9.28814	4.74364	-3.72349	-1.48316	14.5093	13.2914	0.515867	-7.16626	-1.26645								27.5	-44.8403	-35.8103	-81.0556	-83.8357	-49.1589	-25.4341	-63.6459		27.5	4.02811	12.5651	-0.167708
									28	-72.8399	-52.3481	-56.4376	-24.9086	-72.9905	-79.9654	-83.3971	-31.3957	-61.9263		28	11.9774	0.594875	-5.50788	-5.08811	9.19551	13.5998	6.01325	-5.65213	-5.00229								28	-20.7438	-34.3469	-80.7294	-62.3681	-18.1877	-36.9614	-81.8284		28	1.54671	8.29094	-2.07965
									28.5	-63.2647	-36.5854	-84.6584	-26.4152	-81.6896	-88.3017	-79.3016	-32.2593	-60.3932		28.5	5.85208	7.52427	-5.97784	3.06584	8.46643	1.83368	0.777713	-2.67376	-0.432875								28.5	-67.5555	-22.9616	-81.7949	-72.6579	-9.28716	-55.9727	-66.8589		28.5	15.8997	13.6777	-5.25508
									29				-26.1054	-71.9614	-85.0683	-85.0866	-35.2646	-52.4307		29				7.39693	7.4409	1.84162	-2.69004	-3.26366	1.66631								29	-20.4194	-6.63641	-77.1289	-71.039	-42.0353	-62.7016	-79.5652		29	6.25914	12.0636	-0.549925
									29.5	-80.679	-26.4037	-70.1978	-47.0646	-74.4471	-90.0001	-85.1773	-36.4634	-62.3883		29.5	9.07894	4.64883	0.0544484	5.57089	-0.812144	19.7461	-0.684487	-6.03142	-7.18842								29.5	-61.425	-25.7364	-77.037	-78.4947	-35.7493	-48.7095	-77.0885		29.5	2.63247	10.0413	-2.15804
									30	-65.4653	-49.6368	-77.7348	4.80872	-71.8282	-79.5476	-86.3687	-34.3921	-76.3643		30	-4.373	7.33343	-3.01143	3.517	5.70105	21.2351	-2.72921	-3.31272	-3.0566								30	-27.8812	-33.5208	-75.4032	-65.9535	-24.4901	-41.8278	-70.7567		30	6.32097	9.69792	-3.51597
									30.5	-66.4433	-41.1302	-71.3806	-20.6791	-75.2389	-83.2011	-85.318	-37.1914	-70.2476		30.5	13.8134	8.86507	4.91373	10.3364	7.63504	17.161	-5.02533	-2.86991	-3.79836								30.5	-70.4978	-14.0337	-86.0934	-67.7078	-39.0492	-37.687	-83.3382		30.5	4.66394	11.9337	-3.34123
									31	-71.5261	-47.4845	-78.6533	-26.4159	-63.2594	-87.8723	-83.9869	-28.7139	-53.4459		31	15.0613	7.68997	-5.00011	19.1008	12.3652	8.63583	-5.57621	1.29445	-4.32266								31	-77.2844	-24.8736	-80.736	-65.8944	-26.9006	-47.5784	-78.4878		31	4.24544	14.3562	1.56708
									31.5	-59.4869	-43.9866	-69.6992	-30.1286	-79.8206	-81.0918	-82.4505	-32.4834	-56.512		31.5	13.9833	8.60714	0.729605	11.1184	9.24579	-0.90143	-5.83574	2.57467	-0.852933								31.5	-61.0886	-50.5401	-89.1623	-61.2417	-39.1363	-64.2873	-78.7821		31.5	8.14355	12.6892	-2.76664
									32	-78.3664	-40.9289	-66.2688	-13.259	-82.6756	-83.2729	-83.9154	-33.2279	-57.7722		32	14.2733	10.2799	-3.11664	7.68573	7.34415	-0.587031	-6.14889	3.09611	-3.7365								32	-54.7291	-33.3144	-77.8768	-70.6475	-34.0568	-41.7231	-68.8623		32	-1.6465	10.3748	-0.263779
									32.5	-74.694	-38.3626	-57.5985	-20.2121	-77.2392	-85.9804	-83.9709	-38.3732	-47.8008		32.5	19.8278	8.16707	1.67371	8.13559	4.84387	12.4496	3.30479	3.10912	1.81933								32.5	-39.421	-15.0958	-79.8652	-80.7919	-21.6139	-44.4126	-80.7213		32.5	4.04184	8.50719	-2.74085
									33	-59.4519	-52.0523	-87.3519	-31.9175	-71.4699	-85.0552	-80.7194	-52.6315	-45.3252		33	12.2969	12.731	0.0476845	4.95772	9.68707	9.50114	-6.55642	4.49188	-2.84514								33	-60.5041	-44.7969	-81.1714	-67.8457	-22.0751	-36.6274	-52.9088		33	-0.123123	12.3211	-2.83315
									33.5	-66.2841	-47.7174	-79.9365	-26.764	-76.017	-90.4099	-79.252	-48.3695	-70.1495		33.5	18.6418	7.39208	8.01385	17.0684	6.85458	14.2626	-6.56783	-2.37638	6.08482								33.5	-49.1982	-2.26087	-86.8678	-76.4403	-32.3315	-44.6683	-65.8911		33.5	7.03974	12.3928	-1.60339
									34	-69.7808	-46.978	-78.2576	-40.5894	-65.8864	-80.9448	-84.8846	-36.9115	-40.2781		34	18.304	12.2449	3.94883	7.48733	8.70428	2.3186	-6.97112	1.32795	0.0470603								34	-55.0494	-25.3927	-83.8908	-76.6421	-35.127	-50.6426	-56.594		34	1.93119	12.1302	0.167136
									34.5	-64.0523	-39.5078	-67.3924	-22.3208	-77.9641	-81.4419	-84.5392	-27.4204	-52.5287		34.5	12.47	10.3186	3.07479	9.5435	6.34421	20.2521	-8.06042	0.483487	5.01546								34.5	-47.7867	-34.0838	-84.6165	-70.2463	-19.6697	-50.2778	-49.3916		34.5	4.65285	11.4632	-2.60697
									35	-73.874	-50.5796	-67.8726	-48.6939	-80.0977	-78.95	-84.3741	-46.3058	-55.1495		35	17.937	16.0748	-2.35414	9.78102	5.47014	0.375399	-8.34921	3.13701	-2.16142								35	10.5672	-33.4402	-83.688	-69.0131	-30.705	-31.093	-76.4245		35	-6.15694	10.2171	-0.936845
									35.5	-64.6277	-51.9015	-74.6478	-58.2628	-74.6847	-84.7117	-85.3139	-37.4258	-35.5569		35.5	-4.05096	5.08526	-7.52959	10.6658	6.65934	12.9975	-13.6935	3.71119	0.185302								35.5	-50.0159	-23.0879	-84.7656	-66.2886	-30.1441	-46.9468	-74.331		35.5	3.37133	11.3235	-1.69433
									36	-69.615	-55.4288	-64.2139	-37.6634	-65.7472	-76.7995	-84.1245	-25.7264	-56.9737		36	13.8654	1.07469	3.68509	7.2436	5.19012	17.2595	-9.09391	-1.69903	20.5945								36	-30.6874	-41.4105	-83.4363	-70.1761	-43.095	-20.5645	-84.9493		36	1.51688	9.66756	1.18837
									36.5	-70.7178	-60.124	-69.801	-35.2042	-64.4358	-83.2515	-84.0562	-35.2652	-54.2583		36.5	13.0517	4.87008	0.049617	8.70323	5.22391	8.54848	-10.4935	0.19361	5.1931								36.5	-49.1764	-30.9257	-82.1203	-75.7729	-34.0978	-63.4946	-74.0201		36.5	3.81737	6.43285	-2.71555
									37	-63.0109	-62.1004	-78.535	-38.5683	-66.5878	-81.8449	-83.232	-23.1426	-54.6338		37	22.6804	5.00315	-2.04855	9.70767	2.85776	22.7354	-8.58828	3.39619	-2.71127								37	-83.1234	-70.1846	-30.5272	-51.9271	-82.7665		-82.7665		37	1.65338	6.90084	1.69301
									37.5	-71.9957	-49.8242	-62.6915	-59.0783	-69.1602	-80.5906	-87.4408	-41.9331	-56.4763		37.5	12.3619	6.38282	3.83245	14.3932	5.31733	11.6793	-10.2836	-3.60985	-2.00012								37.5	-85.4111	-79.0394	-52.9602	-56.9295	-78.6815		-78.6815		37.5	-1.45627	7.03316	2.47131
									38	-61.7121	-51.1008	-70.6897	-54.5915	-64.944	-79.542	-87.1196	-20.9792	-57.2591		38	-22.8014	2.70075	-0.383307	18.011	4.36594	-5.80936	-9.14249	3.81285	-2.87549								38	-86.254	-82.9069	-46.7593	-57.4907	-43.3305		-43.3305		38	3.68711	8.57561	1.35311
									38.5	-69.5051	-43.9592	-77.3547	-41.289	-60.5599	-76.4475	-86.2639	-34.0667	-59.4171		38.5	-23.6474	4.69133	-1.31233	16.3993	1.71624	33.0215	-7.36969	4.96879	2.03265								38.5	-84.6098	-73.4996	-35.3242	-43.0846	-79.9924		-79.9924		38.5	-0.714783	7.30582	0.0547684
									39	-68.278	-52.4964	-66.9655	-35.1036	-49.2186	-86.0848	-82.1807	-36.1078	-38.5671		39	0.269848	15.4213	4.96613	15.1692	13.077	-4.92669	-10.8187	4.60209	-2.46596								39	-84.5553	-68.8368	-11.2986	-55.3514	-50.7388		-50.7388		39	-6.06497	5.32769	-1.26079
									39.5	-55.5576	-42.6649	-71.3741	-72.2494	-75.791	-88.2652	-86.3259	-35.9632	-51.3431		39.5	-0.141896	4.45694	-6.1703	15.34	7.30289	13.2326	-9.74565	-3.84214	1.19735								39.5	-82.389	-65.5701	-21.129	-55.5944	-51.8383		-51.8383		39.5	-1.0482	6.57971	-1.31636
[truncated: 4 more columns]

## Sheet: Fig.5 Supplement 1 Values
	5.1B			5.1B
	INDUCTION SPIKING			RAMP
	RAMP PARADIGM			CTA (spikes/100ms)
	CONTROL	CTA		n = 3/7 cells
	n = 9 cells	n = 7 cells		Time (s)	Cell 1 - LTD	Cell 2 - LTD	Cell 3 - LTD
	LTD = 0	LTD = 3		0	0	0	0
	LTP = na	LTP = na		1	0	0	0
	no change = na	no change = na		2	5.3	0	0.714286
				3	1.6	1	0.357143
				4	1.7	0	0.785714
				5	1.1	0	0.5
				6	1.35	0	0.714286
				7	0.95	0	0.928571
				8	0	0	0
				9	0	0	0
				10	0	0	0
	5.1C					5.1C
	CONTROL					CTA
	n = 9 cells					n = 7 cells
	% CHANGE	PAIRED-PULSE RATIO	COEFFICIENT OF VARIATION	DECAY TAU		% CHANGE	PAIRED-PULSE RATIO	COEFFICIENT OF VARIATION	DECAY TAU
	-35.3315	1.11579	0.129041	0.0127545		-47.1104	0.956603	0.138803	0.00546954
	-54.503	1.27117	0.20499	0.00551662		-69.1403	1.02	0.311546	0.0145486
	-67.2223	1.51643	0.163739	0.00855533		-43.7575	0.841222	0.344442	0.00468258
	-48.3983	1.33816	0.117992	0.00897324		-28.6224	1.4967	0.161152	0.00804658
	-71.921	1.17489	0.225625	0.00897529		-83.3018	1.03138	0.10009	0.00808673
	-35.4091	0.903785	0.138086	0.0107647		-71.235	0.851553	0.178341	0.00758824
	-70.6313	1.12546	0.188636	0.012818		-31.5245	1.01574	0.169316	0.00778343
	-82.7653	1.11826	0.198404	0.0125217
	-84.2919	1.44609	0.250931	0.00528541

## Sheet: Fig.5 Statistics
	PANEL	SAMPLE SIZE	STATISTICAL TEST	TEST STATISTICS	p-VALUE
	5B, Distribution of plasticity induction	Control, n = 9 cells; CTA, n = 7 cells	3x2 Chi Square	chi square = 0, df = 2	1
	PANEL	SAMPLE SIZE	EFFECT SIZE	D Mean [CI, lower limit, upper limit]	p-VALUE
	5C, Paired-pulse ratio: Control, pre vs. post	Control-LTD, n = 9 cells	Paired permutation t-test	-0.31 [95%, -0.42, -0.19]	0
	5C, Coefficient of variation: Control, pre vs. post	Control-LTD, n = 9 cells	Paired permutation t-test	0.02 [95%, -0.03, 0.06]	0.3334
	5E, Paired-pulse ratio: CTA, pre vs. post	CTA-LTD, n = 7 cells	Paired permutation t-test	-0.35 [95%, -0.48, -0.14]	0.0296
	5E, Coefficient of variation: CTA, pre vs. post	CTA-LTD, n = 7 cells	Paired permutation t-test	0.04 [95%, 0.01, 0.08]	0.0314
	PANEL	SAMPLE SIZE	STATISTICAL TEST	TEST STATISTICS	p-VALUE
	5.1B Distribution of induction spiking	Control, n = 9 cells CTA, n = 7 cells	2x2 Chi Square	chi square = 2.35, df = 1	0.1253
	5.1C, Initial PPR/induced plasticity correlation	Control, n = 9 cells	Spearman rank order correlation	rs = -0.3431	0.366
		CTA, n = 7 cells	Spearman rank order correlation	rs = 0.1622	0.7283
	5.1C, Initial CV/induced plasticity correlation	Control, n = 9 cells	Spearman rank order correlation	rs = -0.8536	0.0034
		CTA, n = 7 cells	Spearman rank order correlation	rs = 0.1786	0.7017
	5.1C, Initial Decay tau/induced plasticity correlation	Control, n = 9 cells	Spearman rank order correlation	rs = 0.2760	0.4722
		CTA, n = 7 cells	Spearman rank order correlation	rs = -0.2191	0.6369
