# Supplementary material for: LTD at amygdalocortical synapses as a novel mechanism for hedonic learning
Source: eLife. 2020 Nov 10;9:e55175. doi: 10.7554/eLife.55175 (PMC7655100; doi:10.7554/eLife.55175)
Supplement: Figure 6—source data 1. — Excel worksheet tabs are labeled to indicate the specific figure. Each data table is labeled to indicate the specific figure panel. The statistics worksheet indicates specific tests and values applied to each data set in the figure and supplements. [file elife-55175-fig6-data1.xlsx]

## Sheet: Fig.6 Values
	6C - GFP CONTROL										6G					6G
	CONSUMPTION (ml)							CONSUMPTION (ml)			INITIAL SUCROSE PREFERENCE					AVERSION INDEX
	HABITUATION - H2O				CONDITIONING			TEST DAY			(Average H2O)/(C1 sucrose)					(H2O - sucrose)/(H2O + sucrose)
	DAY 1	DAY 2	DAY3	DAY 4	SUCROSE #1	DAY 6 - H2O	SUCROSE #2	SUCROSE	H2O		GFP Control	Paired 20hz	Unpaired 20Hz	Ramp		GFP Control	Paired 20hz	Unpaired 20Hz	Ramp
	7.1	9.5	9.4	6.6	14	7.3	15.5	11.8	0.94		1.7284	1.50928	2.07626	1.10312		-0.852433	0.109677	-0.951902	-0.965328
	4.4	7.7	7.4	8.4	10.8	10.7	13.2	15.3	1.4		1.43681	1.53846	3.27722	1.42379		-0.832335	-0.417598	-0.632317	-0.769746
	5.5	6.02	5.17	6.04	9.09		9.01	12.17	0.34		1.61744	1.8513	1.58052	1.20575		-0.945643	0.254745	-0.00573066	-0.870712
	6.06	4.47	5.25	6.28	11.05	5.9	11.32	9.71	0.61		2.00363	0.756969	1.26095	1.39624		-0.881783	-0.287442	-0.881832	-0.865019
	5.06	4.85	7.26	8.63	15.21	8.07	14.64	14.66	0.44		2.35814	1.93047	1.2843	1.62015		-0.941722	0.451966	-0.533013	-0.863558
	5.22	5.1	6.65	7.21	6.6	6.49	9.45	9.46	0.71		1.09181	2.14326		1.06969		-0.860374	-0.383991		-0.882199
	7.28	8.53	7.49	9.23	11.96	9.79	10.96	11.46	0.74		1.38479	1.40171				-0.878689	-0.689734
	7.54	7.6	7.1	6.99	14.1	9.15	14.06	11.67	0.96		1.98918	1.01981				-0.847981	-0.732777
	6D - PAIRED 20HZ OPTO
	CONSUMPTION (ml)							CONSUMPTION (ml)
	HABITUATION - H2O				CONDITIONING			TEST DAY
	DAY 1	DAY 2	DAY3	DAY 4	SUCROSE #1	DAY 6 - H2O	SUCROSE #2	SUCROSE	H2O
	4.7	11.4	7.5	7.8	12.2	10.1	12.3	6.9	8.6
	8.44	5.78	7.03	7.73	11.16	9.07	11.69	10.15	4.17
	5.35	8.19	6.46	7.09	12.45	6.94	10.01	3.73	6.28
	5.48	7.46	6.68	5.85	4.82	9.55	13.44	6.92	3.83
	9.62	8.81	7.01	6.2	15.27	6.61	16.62	4.25	11.26
	7.14	5.2	9.12	7.02	15.26	7.52	11.37	11.93	5.31
	6.58	7.59	8.9	7.35	10.66	6.91	12.9	11.11	2.04
	5.56	6.37	6.65	8.68	6.95	9.8	10.56	8.3	1.28
	6E - NON-PAIRED 20HZ OPTO
	CONSUMPTION (ml)							CONSUMPTION (ml)
	HABITUATION - H2O				CONDITIONING			TEST DAY
	DAY 1	DAY 2	DAY3	DAY 4	SUCROSE #1	DAY 6 - H2O	SUCROSE #2	SUCROSE	H2O
	8.08	12.39	7.99	8.78	19.33	10.53	15.35	17.45	0.43
	4.42	5.32	4.71	6.58	17.23	4.63	10.56	9.9	2.23
	6.16	6.5	6.36	7.68	10.55	4.94	11.52	7.02	6.94
	7.2	5.7	8.77	6.88	9	7.65	11.52	12.74	0.8
	9.09	6.68	7.23	6.37	9.43	9.18	12.62	12.77	3.89
	6F - RAMP OPTO
	CONSUMPTION (ml)							CONSUMPTION (ml)
	HABITUATION - H2O				CONDITIONING			TEST DAY
	DAY 1	DAY 2	DAY3	DAY 4	SUCROSE #1	DAY 6 - H2O	SUCROSE #2	SUCROSE	H2O
	9.91	5.87	9.56	8.02	9.2	7.73	14.42	10.77	0.19
	4.51	3.77	6.86	8.15	8.29	6.28	8.82	13.22	1.72
	5	4.22	4.54	4.32	5.45	3.48	6.93	7.09	0.49
	7.62	9.19	5.52	6.92	10.21	6.64	10.21	9.81	0.71
	5.17	5.07	3.85	4.97	7.72	4.72	10.33	10.79	0.79
	6.03	3.98	4.07	4.43	4.95	5.35	6.88	7.19	0.45

## Sheet: Fig.6 Supplemental 1 Values
	6.1A,B
	GFP CONTROL		PAIRED 20HZ OPTO		NON-PAIRED 20HZ OPTO		RAMP OPTO
	AVERAGE H2O	SUCROSE #1	AVERAGE H2O	SUCROSE #1	AVERAGE H2O	SUCROSE #1	AVERAGE H2O	SUCROSE #1
	8.15	14	7.85	12.2	9.31	19.33	8.34	9.2
	6.975	10.8	7.245	11.16	5.2575	17.23	5.8225	8.29
	5.6825	9.09	6.7725	12.45	6.675	10.55	4.52	5.45
	5.515	11.05	6.3675	4.82	7.1375	9	7.3125	10.21
	6.45	15.21	7.91	15.27	7.3425	9.43	4.765	7.72
	6.045	6.6	7.12	15.26			4.6275	4.95
	8.1325	11.96	7.605	10.66
	7.3075	14.1	6.815	6.95

## Sheet: Fig.6 Statistics
	PANEL		SAMPLE SIZE	STATISTICAL TEST	D Mean [CI, lower limit, upper limit]	p-VALUE
	6C, GFP Control	Conditioning: C1 vs. C2	N = 8 rats	Paired permutation t-test	0.67ml [95%, -0.17, 1.65]	0.232
		Test day: H2O vs. sucrose	N = 8 rats	Paired permutation t-test	-11.26ml [95%, -12.72, -10.13]	0
	6D, Paired 20Hz	Conditioning: C1 vs. C2	N = 8 rats	Paired permutation t-test	1.27ml [95%, -0.88, 4.13]	0.4094
		Test day: H2O vs. sucrose	N = 8 rats	Paired permutation t-test	-2.57ml [95%, -5.79, 1.85]	0.2402
	6E, Unpaired 20Hz	Conditioning: C1 vs. C2	N = 5 rats	Paired permutation t-test	-0.79ml [95%, -4.60, 2.17]	0.6822
		Test day: H2O vs. sucrose	N = 5 rats	Paired permutation t-test	-9.12ml [95%, -13.52, -3.97]	0.067
	6F, Paired Ramp	Conditioning: C1 vs. C2	N = 6 rats	Paired permutation t-test	1.96ml [95%, 0.86, 3.69]	0.0586
		Test day: H2O vs. sucrose	N = 6 rats	Paired permutation t-test	-9.09ml [95%, -10.54, -7.49]	0
	PANEL		SAMPLE SIZE	STATISTICAL TEST	TEST STATISTICS	p-VALUE
	6G, Sucrose preference	All groups (C1/Average H2O)	N = 8, N= 8, N= 6, N = 5	One-Way Anova	F (3,23) = 1.47	0.2489
	6G, Aversion Index	Aversion Index, all groups	N = 8, N= 8, N= 6, N = 5	One-Way Anova	F (3,23) = 8.97	0.000405
		GFP Control vs. Paired 20Hz	N = 8 rats, N =8 rats	Tukey HSD	Q = 6.58	0.001
		GFP Control vs. Unpaired 20Hz	N = 8 rats, N = 5 rats	Tukey HSD	Q = 2.41	0.3464
		GFP Control vs. Paired Ramp	N = 8 rats, N = 6 rats	Tukey HSD	Q = 0.09	0.9
		Paired 20Hz vs. Unpaired 20Hz	N = 8 rats, N = 5 rats	Tukey HSD	Q = 3.33	0.1151
		Paired 20Hz vs. Paired Ramp	N = 8 rats, N = 6 rats	Tukey HSD	Q = 5.96	0.0017
		Unpaired 20Hz vs. Paired Ramp	N = 5 rats, N = 6 rats	Tukey HSD	Q = 2.18	0.4302
	6.1A, Average H2O	All groups	N = 8, N= 8, N= 6, N = 5	One-Way Anova	F (3,23) = 1.63	0.2099
	PANEL		SAMPLE SIZE	STATISTICAL TEST	D Mean [CI, lower limit, upper limit]	p-VALUE
	6.1B, GFP Control	Average H2O vs. C1 sucrose	N = 8 rats	Paired permutation t-test	4.73ml [95%, 3.01, 6.40]	0.0096
	6.1B, Paired 20Hz	Average H2O vs. C1 sucrose	N = 8 rats	Paired permutation t-test	3.86ml [95%, 1.55, 5.90]	0.0128
	6.1B, Unpaired 20Hz	Average H2O vs. C1 sucrose	N = 5 rats	Paired permutation t-test	5.96ml [95%, 2.40, 9.60]	0
	6.1B, Paired Ramp	Average H2O vs. C1 sucrose	N = 6 rats	Paired permutation t-test	1.74ml [95%, 0.87, 2.52]	0
